# Supplementary material
Source: Research Square preprint supplement (doi:10.21203/rs.3.rs-10070649/v1)
Supplement: Supplementary file 2 [file e1600f6aef66c8f79f23cbfc.xlsx]

## Sheet: Read me
Supplementary Data — Sustained background wind and coral bleaching severity
This workbook contains the two analysis datasets underlying the study, as derived by the authors. Table S1 (SAF) is the event-resolved dataset adapted from Safaie et al. (2018); all predictors are z-standardized (mean 0, s.d. 1) model-ready inputs and the response is the ordinal Safaie bleaching index. Table S2 (GLO) is the spatially gridded dataset derived from the Global Coral-Bleaching Databas…
Dataset	Variable (file name)	Description	Units	Standardized	Used in
S1 SAF	Latitude	Site latitude (standardized)	z	Yes	Geographic covariate
S1 SAF	Bleaching_prevalence	Bleaching severity, ordinal Safaie index	0–4 classes	No	Response variable
S1 SAF	DHW_30	Degree Heating Weeks (30-day window)	z	Yes	Thermal; Base model; Shapley (Thermal)
S1 SAF	DTR_30	Diurnal temperature range (30-day)	z	Yes	Thermal; Base model
S1 SAF	Acute_1	Acute thermal-stress anomaly	z	Yes	Thermal; Base model
S1 SAF	ROTC	Rate of temperature change (heating rate)	z	Yes	Thermal; Base model
S1 SAF	TT	Thermal trajectory	z	Yes	Thermal; Base model (replaced by MWS_12 in TT→Wind model)
S1 SAF	Depth	Reef depth	z	Yes	Base model; Shapley (Depth)
S1 SAF	Wind_6m_mean_z	Mean wind speed, 6-month antecedent	z	Yes	Wind candidate
S1 SAF	Wind_12m_mean_z	Mean wind speed, 12-month (MWS_12)	z	Yes	Primary wind predictor; Base+wind; Shapley (Wind)
S1 SAF	Wind_mean_1993_2020_z	Mean wind speed, 1993–2020 climatology	z	Yes	Wind candidate
S1 SAF	TCPower_6m_scaled_z	Tropical-cyclone power, 6-month	z	Yes	Cyclone candidate
S1 SAF	TCPower_12m_scaled_z	Tropical-cyclone power, 12-month	z	Yes	Cyclone candidate
S1 SAF	TCPower_1993_2020_scaled_z	Tropical-cyclone power, 1993–2020	z	Yes	Cyclone candidate
S2 GLO	latitude	Site latitude	degrees	No	Predictor (geographic); locator
S2 GLO	longitude	Site longitude	degrees	No	Predictor (circular lon_sin/lon_cos); locator
S2 GLO	realm_name	Marine Ecoregions of the World realm	—	No	Grouping (FE / random intercept; within-region tests)
S2 GLO	EventDate	Survey date	date	No	Metadata / temporal locator
S2 GLO	bleaching_categorical	Bleaching severity class (5=Low, 30=Moderate, 75=Severe)	% class	No	Response variable
S2 GLO	tsa_dhw	Thermal Stress Anomaly DHW	°C-weeks	No	Thermal; primary TSA metric; Shapley
S2 GLO	tsa_dhw_standard_deviation	TSA DHW standard deviation	°C-weeks	No	Thermal; rotated TSA candidate
S2 GLO	tsa_dhwmax	TSA DHW maximum	°C-weeks	No	Thermal; rotated TSA candidate
S2 GLO	tsa_dhwmean	TSA DHW mean	°C-weeks	No	Thermal; rotated TSA candidate
S2 GLO	sst_pc1	SST climatology, principal component 1	PC score	No	Robust predictor (PC1)
S2 GLO	sst_pc2	SST climatology, principal component 2	PC score	No	Predictor
S2 GLO	sst_pc3	SST climatology, principal component 3	PC score	No	Predictor
S2 GLO	wind_mean_6m	Mean wind speed, 6-month antecedent	m s⁻¹	No	Wind candidate
S2 GLO	wind_mean_12m	Mean wind speed, 12-month	m s⁻¹	No	Wind candidate
S2 GLO	wind_mean_1993_2020	Mean wind speed, 1993–2020 (MWS_6 reported)	m s⁻¹	No	Primary wind predictor; Shapley (Wind)
S2 GLO	tcpower_6m_400km	Tropical-cyclone power within 400 km, 6-month	J (relative)	No	Cyclone candidate
S2 GLO	tcpower_12m_400km	Tropical-cyclone power within 400 km, 12-month	J (relative)	No	Cyclone candidate
S2 GLO	tcpower_1993_2020_400km	Cumulative cyclone power 1993–2020, 400 km	J (relative)	No	Cyclone predictor (TCP_1993-2020)
S2 GLO	distance_to_shore	Distance to nearest shoreline	m	No	Robust predictor
S2 GLO	exposure	Wave exposure class (0=protected,1=intermediate,2=exposed)	class	No	Robust predictor
S2 GLO	turbidity	Mean turbidity (Kd490-scaled)	m⁻¹ (rel.)	No	Predictor; wind×turbidity interaction
S2 GLO	omega_0m	Surface aragonite saturation state (Ωarag)	dimensionless	No	Carbonate test (Fig. 4); BUD model

## Sheet: Table S1 - SAF
Table S1 | SAF dataset — event-resolved, adapted from Safaie et al. 2018 (n = 81). Predictors z-standardized; response = ordinal Safaie bleaching index (0–4).
Latitude	Longitude	Bleaching_prevalence	DHW_30	DTR_30	Acute_1	ROTC	TT	Depth	Wind_6m_mean_z	Wind_12m_mean_z	Wind_mean_1993_2020_z	TCPower_6m_scaled_z	TCPower_12m_scaled_z	TCPower_1993_2020_scaled_z
-19.1715	146.847	4	0.250154	-0.622494	1.22977	-1.46412	1.17146	0.378799	-2.41829	-3.20072	0.450119	0.509868	0.913517	1.0115
-18.5719	146.483	4	0.878636	0.333783	1.22977	0.0830814	1.17146	-0.309154	-1.23148	-1.3754	-0.816294	0.513319	1.03916	1.18905
-18.5463	146.488	1	-0.443327	-1.05678	-0.803118	0.0197336	-0.384085	0.65398	-1.39283	-1.29966	-0.816294	0.568964	1.18247	1.19654
-20.2557	148.812	1	-0.443327	-0.78386	-0.803118	-0.160877	-0.384085	-0.194495	-0.583244	-0.687513	0.7506	0.278142	0.359281	1.00267
-18.806	147.669	1	-0.443327	-0.721698	-0.803118	-0.0871552	-0.384085	0.814502	0.0381662	0.55689	0.602335	-0.498102	1.31595	1.54711
-23.2015	150.97	1	-0.377588	-0.774919	-0.803118	-0.18581	-0.384085	0.539321	1.38075	0.676218	-0.240898	-0.498102	-0.789607	-0.317699
22.2	38.9	4	-0.00633148	-0.685812	1.22977	-0.0199617	-0.384085	-0.65313	-1.15257	-1.3794	-3.19555	-0.498102	-0.789607	-0.999808
22.2	38.9	4	-0.416375	-0.628029	-0.803118	-0.0199617	-0.384085	-0.65313	-1.15257	-1.3794	-3.19555	-0.498102	-0.789607	-0.999808
-23.0864	150.905	0	-0.439316	-0.158225	-0.803118	-0.335671	-0.384085	-0.561403	0.839092	0.668441	0.250917	-0.498102	1.35253	-0.192413
-23.0864	150.905	4	-0.443327	-0.339056	-0.803118	-0.335671	-0.384085	-0.561403	0.839092	0.668441	0.250917	-0.498102	1.35253	-0.192413
-23.4384	151.918	4	1.10944	-0.708499	1.22977	0.0232846	2.727	0.172413	0.289277	0.498137	0.659699	-0.400235	-0.735639	-0.304037
-18.6521	147.722	0	-0.443327	-0.735765	-0.803118	0.0232846	-0.384085	0.172413	-0.0184542	0.263775	0.602335	1.89176	0.907193	1.58031
-23.0864	150.905	4	-0.443327	-0.697264	-0.803118	0.0232846	-0.384085	0.172413	1.42914	0.695942	0.250917	-0.498102	-0.789607	-0.192413
-23.4384	151.918	4	2.77883	-0.652638	1.22977	0.0232846	1.17146	0.172413	0.174289	0.522924	0.659699	-0.498102	-0.789607	-0.304037
-23.2015	150.97	1	2.44667	4.17975	1.22977	0.275185	4.28255	-0.882448	0.153884	0.148067	-0.240898	-0.498102	-0.789607	-0.317699
5.86953	-162.075	1	7.19376	4.73685	1.22977	0.275185	2.727	-0.882448	0.760351	1.01479	0.729813	-0.498102	-0.789607	-0.998848
-3.98833	39.7503	0	0.260503	3.32294	-0.803118	0.275185	-0.384085	-0.882448	-0.837723	-0.373223	0.509186	-0.498102	-0.789607	-0.999808
-18.4443	146.993	1	0.300464	0.181783	1.22977	-0.0574461	-0.384085	-0.630199	-0.538848	0.113289	0.025023	1.27815	1.17253	1.37997
-18.447	146.989	3	0.556152	0.0990564	1.22977	-0.0574461	-0.384085	-0.630199	-0.538848	0.113289	0.025023	1.26464	1.17142	1.38016
-23.1548	150.904	1	-0.413416	-0.433878	-0.803118	0.622298	-0.384085	3.13061	0.832047	0.689162	-0.240898	-0.498102	1.3978	-0.226221
-18.2589	147.381	1	-0.259889	-0.466237	1.22977	0.120646	-0.384085	0.40173	-0.0920116	0.19738	0.497252	2.07169	0.907096	1.50671
-18.2567	147.381	3	1.18479	-0.430728	1.22977	0.120646	-0.384085	0.40173	-0.0920116	0.19738	0.497252	2.07751	0.908082	1.50718
-11.4409	143.034	4	-0.443327	0.0566073	-0.803118	-0.264516	-0.384085	0.0118905	-0.560071	-0.0881501	0.713317	-0.313242	-0.726644	-0.00246735
5.88618	-162.126	2	-0.408151	-0.372951	-0.803118	2.17472	-0.384085	-0.928311	1.43777	0.708596	0.875425	-0.498102	-0.789607	-0.998816
5.87093	-162.075	2	-0.405469	-0.361668	-0.803118	2.1703	-0.384085	-0.928311	1.31659	0.648803	0.729813	-0.498102	-0.789607	-0.998846
-23.2005	150.971	0	-0.172297	-0.207795	1.22977	-0.399938	-0.384085	-0.469676	1.38075	0.676218	-0.240898	-0.498102	-0.789607	-0.317763
-18.5463	146.488	4	0.333647	-0.705945	1.22977	-1.43188	1.17146	0.493457	-0.751996	-0.443109	-0.816294	-0.498102	-0.659048	1.19654
24.638	-82.862	4	-0.15651	-0.691894	1.22977	0.76177	-0.384085	-0.492608	-0.46261	-0.307923	-1.8073	-0.498102	-0.789607	-0.0153554
24.627	-81.11	4	0.0601489	-0.142653	1.22977	0.76177	-0.384085	-0.492608	0.0341679	0.288593	-0.755221	-0.19279	0.315932	-0.355449
24.638	-82.862	3	-0.196771	-0.22071	1.22977	0.76177	-0.384085	-0.492608	-0.718828	-0.306624	-1.8073	-0.498102	-0.594995	-0.0153554
-11.4413	143.034	4	-0.415865	0.106848	1.22977	-0.563934	2.727	-0.882448	-0.560071	-0.0881501	0.713317	-0.313242	-0.726644	-0.00246482
-23.4384	151.918	4	0.699197	0.547519	1.22977	-0.563934	1.17146	-0.882448	1.00944	0.786131	0.659699	-0.498102	-0.789607	-0.304037
-3.98833	39.7503	1	-0.359436	0.133246	-0.803118	-0.676636	-0.384085	-0.538472	-0.209654	-0.253861	0.509186	-0.498102	-0.789607	-0.999808
-18.5464	146.488	1	-0.224817	0.0755303	-0.803118	-0.519066	-0.384085	0.493457	-0.751996	-0.443109	-0.816294	-0.498102	-0.659048	1.19643
-18.8316	147.635	1	-0.443327	-0.50413	-0.803118	-0.486006	-0.384085	3.49752	0.0381662	0.55689	0.602335	-0.498102	1.34668	1.52119
-23.2015	150.97	0	-0.443327	-0.0574988	-0.803118	2.56894	-0.384085	0.562253	0.832047	0.689162	-0.240898	-0.498102	1.43783	-0.317699
-18.2742	147.382	0	-0.443327	0.0174365	-0.803118	2.15922	-0.384085	0.057754	-0.0920116	0.19738	0.497252	2.03074	0.90037	1.49721
-23.2015	150.97	3	-0.443327	-0.156663	-0.803118	2.15922	-0.384085	0.057754	-0.412293	-0.959175	-0.240898	-0.498102	-0.760715	-0.317699
-18.5464	146.488	4	0.115732	-0.539043	1.22977	-1.07903	1.17146	0.057754	-1.23148	-1.3754	-0.816294	0.569578	1.05423	1.19643
-18.5464	146.488	2	0.109483	0.124305	1.22977	-1.99465	4.28255	-0.561403	-1.23148	-1.3754	-0.816294	0.569578	1.05423	1.19643
-16.425	145.993	1	-0.194301	0.85024	-0.803118	0.253205	-0.384085	-0.928311	-0.20952	0.150368	0.617693	1.61246	2.45035	1.55633
-16.3834	145.562	1	-0.272685	-0.367884	1.22977	-0.756172	-0.384085	0.745707	-1.11636	-1.20997	0.450055	0.924919	1.75553	1.06925
5.871	-162.11	0	-0.443327	-0.82359	-0.803118	-0.809842	-0.384085	3.47459	1.63942	1.24818	0.729813	-0.498102	-0.789607	-0.998838
5.88618	-162.126	0	-0.443327	-0.911243	-0.803118	-0.809842	-0.384085	3.47459	0.774144	1.05773	0.875425	-0.498102	-0.789607	-0.998816
25.012	-80.376	1	-0.442203	-0.756374	-0.803118	-0.809842	-0.384085	3.47459	-0.422362	-0.0993698	-0.718412	-0.498102	-0.546206	-0.553392
5.8715	-162.107	0	-0.443327	-0.82359	-0.803118	-0.790414	-0.384085	0.0348223	0.179705	0.577899	0.729813	-0.498102	-0.789607	-0.998837
5.86933	-162.111	0	-0.443327	-0.911243	-0.803118	-0.790414	-0.384085	0.0348223	0.179705	0.577899	0.729813	-0.498102	-0.789607	-0.99884
-18.4448	146.993	2	-0.442203	-0.756374	-0.803118	-0.790414	-0.384085	0.0348223	-0.538848	0.113289	0.025023	1.27723	1.17261	1.37993
5.88133	-162.042	0	-0.349539	1.57303	-0.803118	0.833792	-0.384085	-0.538472	0.212868	0.628661	0.867515	-0.498102	-0.789607	-0.998838
25.012	-80.376	0	0.10315	1.22521	1.22977	0.833792	-0.384085	-0.538472	-0.141678	0.01421	-0.718412	-0.498102	-0.789607	-0.553392
5.8715	-162.107	1	-0.113453	0.91505	-0.803118	0.833792	-0.384085	-0.538472	1.63942	1.24818	0.729813	-0.498102	-0.789607	-0.998837
5.86953	-162.075	1	0.6542	1.07679	1.22977	0.833792	-0.384085	-0.538472	0.179705	0.577899	0.729813	-0.498102	-0.789607	-0.998848
5.88133	-162.042	0	-0.443327	0.47739	-0.803118	-0.791287	-0.384085	-0.355017	1.7253	1.30912	0.867515	-0.498102	-0.789607	-0.998838
5.8715	-162.107	0	-0.432469	0.74264	-0.803118	-0.791287	-0.384085	-0.355017	1.31659	0.648803	0.729813	-0.498102	-0.789607	-0.998837
5.8715	-162.107	0	-0.43656	0.142033	-0.803118	-0.791287	-0.384085	-0.355017	0.760351	1.01479	0.729813	-0.498102	-0.789607	-0.998837
5.87093	-162.075	2	-0.175832	0.324323	-0.803118	-0.791287	-0.384085	-0.355017	0.760351	1.01479	0.729813	-0.498102	-0.789607	-0.998846
5.871	-162.11	0	-0.443327	-0.314119	-0.803118	-0.800587	-0.384085	0.0348223	1.31659	0.648803	0.729813	-0.498102	-0.789607	-0.998838
5.871	-162.11	0	-0.422926	0.604094	-0.803118	-0.800587	-0.384085	0.0348223	0.760351	1.01479	0.729813	-0.498102	-0.789607	-0.998838
5.88618	-162.126	0	-0.443327	-0.394319	-0.803118	-0.800587	-0.384085	0.0348223	0.199046	0.643428	0.875425	-0.498102	-0.789607	-0.998816
5.87093	-162.075	1	-0.40319	-0.377157	-0.803118	-0.800587	-0.384085	0.0348223	0.179705	0.577899	0.729813	-0.498102	-0.789607	-0.998846
5.86933	-162.111	0	-0.443327	-0.460404	-0.803118	-0.729186	-0.384085	-0.194495	1.31659	0.648803	0.729813	-0.498102	-0.789607	-0.99884
5.871	-162.11	2	-0.443327	-0.709678	-0.803118	-0.729186	-0.384085	-0.194495	0.179705	0.577899	0.729813	-0.498102	-0.789607	-0.998838
5.88133	-162.042	0	-0.443327	-0.586261	-0.803118	-1.48669	-0.384085	0.0806858	0.786944	1.07556	0.867515	-0.498102	-0.789607	-0.998838
5.88133	-162.042	0	-0.443327	-0.635908	-0.803118	-1.48669	-0.384085	0.0806858	1.43079	0.698262	0.867515	-0.498102	-0.789607	-0.998838
5.86953	-162.075	1	-0.443327	-0.622425	-0.803118	-1.48669	-0.384085	0.0806858	1.31659	0.648803	0.729813	-0.498102	-0.789607	-0.998848
5.88618	-162.126	1	-0.443159	-0.545448	-0.803118	-1.48669	-0.384085	0.0806858	1.72267	1.30308	0.875425	-0.498102	-0.789607	-0.998816
-19.2011	146.821	4	0.499549	0.616493	1.22977	-0.0266624	1.17146	-0.51554	-2.41829	-3.20072	0.450119	0.447747	0.870376	0.998347
-23.2005	150.971	1	0.123521	1.02387	1.22977	-0.0266624	-0.384085	-0.51554	0.832047	0.689162	-0.240898	-0.498102	1.43716	-0.317763
-18.5463	146.488	4	0.400264	-0.676141	1.22977	0.325248	-0.384085	0.057754	-1.23148	-1.3754	-0.816294	0.568964	1.05419	1.19654
-18.6116	146.484	3	0.508674	0.857904	1.22977	0.325248	-0.384085	0.057754	-1.23148	-1.3754	-0.816294	0.400378	1.00385	1.18571
-18.5464	146.488	1	-0.125717	-0.155638	1.22977	0.325248	-0.384085	0.057754	-0.751996	-0.443109	-0.816294	-0.498102	-0.659048	1.19643
-18.5718	146.483	4	0.499549	0.616493	1.22977	-0.0266624	1.17146	-0.51554	-1.23148	-1.3754	-0.816294	0.512906	1.03912	1.18912
-18.4443	146.993	1	0.123521	1.02387	1.22977	-0.0266624	-0.384085	-0.51554	-0.610235	-0.345562	0.025023	-0.498102	-0.655505	1.37997
-16.4267	145.995	4	-0.211644	-0.692746	1.22977	0.218253	-0.384085	0.65398	-0.20952	0.150368	0.617693	1.61752	2.45692	1.55591
24.456	-81.877	3	-0.321914	-0.153723	-0.803118	0.762801	-0.384085	-0.882448	-0.16482	0.0743262	-1.12419	0.557646	0.0305122	-0.204648
24.627	-81.11	2	-0.028864	0.226915	1.22977	1.13674	-0.384085	-0.882448	0.459411	0.320686	-0.755221	5.99447	1.32601	-0.355449
25.012	-80.376	4	-0.177418	0.214993	-0.803118	1.13674	-0.384085	-0.882448	-0.00986782	0.236635	-0.718412	-0.429344	1.78503	-0.553392
22.2	38.9	4	-0.436277	-0.110294	-0.803118	2.55233	-0.384085	-0.90538	-1.15257	-1.3794	-3.19555	-0.498102	-0.789607	-0.999808
22.2	38.9	4	-0.442568	-0.322327	-0.803118	2.56061	-0.384085	-0.90538	-1.15257	-1.3794	-3.19555	-0.498102	-0.789607	-0.999808
-18.4448	146.993	1	-0.432646	0.00636656	-0.803118	0.509592	-0.384085	-0.538472	-0.610235	-0.345562	0.025023	-0.498102	-0.655505	1.37993
-19.1722	146.848	1	-0.435702	-0.469643	-0.803118	1.29592	-0.384085	0.65398	-2.41829	-3.20072	0.450119	0.51007	0.913525	1.01129

## Sheet: Table S2 - GLO
Table S2 | GLO dataset — gridded, derived from the Global Coral-Bleaching Database (n = 1,195). Raw physical units; response = bleaching severity class (5/30/75).
latitude	longitude	realm_name	EventDate	bleaching_categorical	tsa_dhw	tsa_dhw_standard_deviation	tsa_dhwmax	tsa_dhwmean	sst_pc1	sst_pc2	sst_pc3	wind_mean_6m	wind_mean_12m	wind_mean_1993_2020	tcpower_6m_400km	tcpower_12m_400km	tcpower_1993_2020_400km	distance_to_shore	exposure	turbidity	omega_0m
-4.9025	151.062	Central Indo-Pacific	1998-08-15	30	0	1.6	9.92	0.78	0.889602	-2.29459	0.323423	1.6718	1.62721	3.48946	0	0	4.79421e+06	706.63	1	0.0425	3.92211
-5.2	150.517	Central Indo-Pacific	1998-08-15	30	0	1.81	9.07	1.02	0.790153	-2.319	0.212935	1.46457	1.73017	3.79823	0	0	8.49277e+06	3276.02	0	0.0395	3.92211
7.7221	81.7278	Western Indo-Pacific	1998-05-15	5	6.2	1.27	8.97	0.5	1.48158	-0.642795	-0.819537	4.47315	5.83822	5.78953	4.13179e+06	1.1355e+08	4.23527e+09	976.53	2	0.0686	3.80567
18.453	-64.626	Tropical Atlantic	2005-10-15	75	6.94167	0.85	7.37333	0.246667	1.13452	0.983177	0.620353	6.48432	6.86843	7.0259	0	0	3.42604e+10	325.68	2	0.0489	4.00777
17.824	-64.449	Tropical Atlantic	2005-11-15	75	5.76	0.68	5.75	0.16	1.23143	0.918507	0.634906	6.58415	6.66625	7.17095	520574	520574	3.65691e+10	14660.2	2	0.0359	4.0133
17.624	-63.272	Tropical Atlantic	2005-10-15	75	5.54	0.81	6.8	0.21	1.24308	0.898665	0.609939	6.12063	6.56383	7.11372	567216	567216	3.71755e+10	1422.68	1	0.0344	4.01832
12.05	122.9	Central Indo-Pacific	1998-07-15	75	8.98	2.07	15.32	0.69	1.46145	0.395671	-0.414678	5.37029	5.30526	5.59272	0	1.42094e+08	3.10781e+10	26216.7	0	0.0565	3.7669
17.811	-64.63	Tropical Atlantic	2005-10-15	75	6.89	0.77	6.89	0.22	1.2299	0.919344	0.621974	6.35632	6.73637	7.19209	0	0	3.38634e+10	2399.36	2	0.0372	4.00777
26.7343	127.789	Central Indo-Pacific	2007-06-28	30	0	1.20714	10.6643	0.321429	-0.868847	2.52259	-0.0594808	7.28662	7.27184	7.32228	0	2.09107e+08	9.86363e+10	99.55	2	0.0346	3.57139
19.95	-76.4167	Tropical Atlantic	2003-11-15	5	0	0.97	7.4	0.33	1.57592	0.686607	0.114343	4.89753	5.12978	5.32666	0	0	7.01815e+09	1861.33	2	0.0307	3.95028
-9.4167	46.4167	Western Indo-Pacific	1998-05-15	75	4.61167	1.23167	8.27833	0.455	-1.20625	-0.767449	-0.198762	5.43191	6.63982	6.48923	0	0	1.11698e+09	1311.04	0	0.0412	3.79389
17.637	-64.862	Tropical Atlantic	2005-10-15	75	7.05	0.85	7.04	0.24	1.28906	0.873662	0.60918	6.35632	6.73637	7.19209	0	0	3.5003e+10	5369.78	1	0.0466	4.00777
13.389	-81.418	Tropical Atlantic	2005-11-15	5	1.06	1.21	8.88	0.4	1.59847	0.615533	0.824888	6.15507	6.62742	7.01988	1.4266e+09	1.4266e+09	1.05327e+10	4044.63	0	0.0407	3.72896
27.83	-93.83	Temperate Northern Atlantic	2006-01-15	5	0	0.35	2.76	0.08	-1.31186	2.90045	-0.75253	6.57868	6.18571	6.55145	6.34425e+08	6.47098e+08	1.91999e+10	188875	2	0.0451	3.52995
24.79	-80.8897	Tropical Atlantic	1999-05-15	30	0	0.98	6.42	0.39	-0.0780248	1.83578	-0.626679	7.04876	6.50349	6.46198	0	1.77295e+09	1.30575e+10	2905.8	0	0.21242	3.90301
19.7321	-80.0463	Tropical Atlantic	2002-06-15	5	0	0.87	7.67	0.29	1.34183	0.837332	0.0638174	6.92584	6.85934	6.4879	0	2.72762e+08	1.15912e+10	3650.63	1	0.0262	3.90209
18.378	-67.485	Tropical Atlantic	2005-12-15	75	0	0.72	4.5	0.2	1.36917	0.820472	0.490519	6.30024	6.5495	6.31756	2.06266e+07	2.06266e+07	1.77506e+10	304.27	2	0.0299	3.99539
20.352	-86.883	Tropical Atlantic	2005-11-15	30	6.915	0.965	6.9375	0.2675	1.35453	0.802411	0.400233	6.96132	7.05787	6.77804	1.37552e+10	1.37552e+10	2.71853e+10	1066.9	2	0.0268	3.79592
-16.7745	179.2	Central Indo-Pacific	2005-10-13	30	0	0.95	8.1	0.31	-0.932386	-1.05385	0.0370515	6.86521	6.75811	6.36731	0	0	1.11748e+10	6081.11	0	0.0612	4.00191
21.799	-84.522	Tropical Atlantic	2005-09-15	5	3.57	0.84	6.08	0.25	1.19844	0.924291	-0.034948	5.82087	6.60065	6.57524	6.48995e+08	6.54254e+08	1.67498e+10	965.19	0	0.031	3.84372
27.908	-93.596	Temperate Northern Atlantic	2005-10-15	30	4.31	0.38	4.31	0.06	-1.38552	2.96095	-0.781277	4.98228	6.20221	6.47445	9.06743e+08	9.06743e+08	1.95356e+10	195281	2	0.0459	3.52995
18.3833	-64.4833	Tropical Atlantic	2005-09-15	75	5.08	1.05	11.92	0.25	1.14672	0.974843	0.628353	6.2045	6.63345	7.04292	0	9.77112e+08	3.39185e+10	409.79	0	0.0422	4.0133
17.463	-63.2227	Tropical Atlantic	1999-12-07	5	1.02	0.53	3.88	0.14	1.26879	0.880357	0.61304	7.06458	7.0025	7.11372	1.10399e+10	1.10399e+10	3.30381e+10	17761.9	1	0.0442	3.99859
-0.7998	-90.1042	Tropical Eastern Pacific	1998-03-15	75	30.44	5.24	37.84	1.61	-2.7264	0.080728	0.663697	4.44404	5.14833	4.69801	0	0	0	1834.21	0	0.072	3.12155
-0.2779	-90.5162	Tropical Eastern Pacific	1998-03-15	75	26.89	4.82	33.35	1.75	-2.54465	-0.0511458	0.627344	3.94761	4.56019	4.91982	0	0	0	2779.76	2	0.0722	3.1437
9.5167	138.167	Central Indo-Pacific	1998-09-15	5	1.84	1.66	11.59	0.8	2.09451	0.188686	0.345207	5.39403	6.25891	6.29776	0	9.90739e+07	2.13328e+10	248.28	0	0.0249653	3.86772
26.9474	-80.0319	Tropical Atlantic	2011-08-17	5	3.55	0.99	6.08	0.31	0.250102	1.62579	-0.207203	5.15581	6.1014	6.26398	1.39981e+08	3.39183e+08	2.52195e+10	3903	2	0.0605478	3.88532
12.078	-68.2158	Tropical Atlantic	1998-09-15	30	0	0.865	6.96333	0.26	1.15823	0.931021	1.06419	6.77379	7.01598	7.53646	0	0	2.50103e+09	1674.85	2	0.0344	3.82443
17.885	-66.9517	Tropical Atlantic	2017-10-26	5	0	0.65	4.53	0.16	1.38123	0.817943	0.56967	6.86949	6.87796	7.13058	1.65313e+09	1.65313e+09	1.73771e+10	5096.08	2	0.0442	3.99539
13.506	-81.367	Tropical Atlantic	2005-11-15	5	2.75	1.28	10.11	0.38	1.59227	0.620524	0.831814	6.19179	6.64158	7.07732	1.68979e+09	1.68979e+09	1.16414e+10	12505.2	1	0.0562423	3.76004
17.463	-63.2227	Tropical Atlantic	1999-12-07	5	1.02	0.53	3.88	0.14	1.26879	0.880357	0.61304	7.06458	7.0025	7.11372	1.10397e+10	1.10397e+10	3.30381e+10	16864.2	2	0.0442	3.99859
24.7224	-82.8505	Tropical Atlantic	2009-09-02	5	0	0.77	9.22	0.16	-0.331118	2.10936	-0.567491	4.66614	6.02528	5.94572	1.00211e+07	7.69544e+07	1.94575e+10	10490	2	0.0607	3.87219
12.2235	93.0209	Western Indo-Pacific	2016-05-07	75	1.7	1.37	10.5	0.43	1.08691	-1.35777	-0.766632	4.5963	5.43611	5.72181	0	0	3.2562e+09	19.48	0	0.0584	3.65219
24.6791	-83.036	Tropical Atlantic	2007-09-26	30	0	0.65	5.61	0.15	-0.231656	2.03317	-0.514159	4.94114	6.21532	6.01527	9.88422e+07	9.88422e+07	2.05141e+10	12605	2	0.0527	3.87219
25.1639	-80.2373	Tropical Atlantic	2008-09-17	5	0	0.55	3.92	0.14	0.166426	1.66662	-0.422115	6.01169	6.77833	6.34839	3.22734e+08	5.29175e+08	1.21584e+10	11153	2	0.0478	3.91656
25.0881	-77.4737	Tropical Atlantic	1998-08-15	75	1.39	0.66	4.28	0.18	0.264508	1.68735	-0.134535	5.26797	5.64774	5.92082	0	0	1.78895e+10	2563.78	0	0.0385	3.9497
18.6	-87.7	Tropical Atlantic	2007-07-15	30	0	0.93	7.43	0.3	1.34624	0.780272	0.391053	6.4738	6.56788	6.9134	1.47166e+08	1.47166e+08	2.45083e+10	3614.18	1	0.027453	3.76935
16.3333	-86.4667	Tropical Atlantic	1998-09-15	30	2.6	1.34	8.5	0.47	1.48816	0.66013	0.457738	4.41569	4.50747	6.03675	0	0	1.95041e+10	716.63	2	0.0361	3.75279
19.9613	-75.871	Tropical Atlantic	2003-09-15	5	0	0.68	5.31	0.22	1.57505	0.673175	0.0967033	5.0516	5.03984	5.41246	0	2.51893e+08	8.42705e+09	633.53	2	0.0176	3.95028
24.6293	-82.803	Tropical Atlantic	2012-09-15	30	0	0.62	6.02	0.14	-0.254625	2.0485	-0.535666	5.11123	6.25614	5.94572	6.47884e+08	6.50177e+08	1.94024e+10	6110	2	0.0722	3.87219
22.7006	-79.0078	Tropical Atlantic	2004-11-01	5	0	1.02	6.6	0.41	0.646352	1.27114	-0.145371	6.88933	7.48066	6.23853	3.17516e+08	3.17516e+08	1.37412e+10	4204.93	2	0.0682	3.9363
24.9378	-80.4716	Tropical Atlantic	2010-09-07	5	0	1.23	14.75	0.29	0.0895275	1.72508	-0.487405	5.7667	6.5059	6.48004	1.134e+08	1.134e+08	1.17693e+10	7093	2	0.0804327	3.91656
12.0812	-68.8955	Tropical Atlantic	2013-10-23	30	3.3375	0.8	6.62	0.2375	1.15568	0.934984	1.07022	8.1889	8.09774	8.33866	0	0	2.36895e+09	340.2	1	0.0363	3.81525
32.251	-64.804	Tropical Atlantic	2005-08-15	5	0	0.62875	5.21625	0.1525	-1.78756	3.23272	0.515511	6.47722	7.17465	7.27545	5.80586e+08	9.45937e+08	2.15729e+10	906.25	2	0.0544	3.78605
-9.33	50.73	Western Indo-Pacific	1998-02-15	75	1.44	1.43	10.4	0.64	-1.12715	-0.818002	-0.0682245	7.12305	7.60234	7.40762	0	0	1.01941e+10	59.23	2	0.0425	3.78415
25.3409	-78.0933	Tropical Atlantic	2013-09-08	5	0	0.65	3.93	0.22	0.132786	1.71131	-0.347411	5.45862	5.68102	5.26726	1.29703e+08	1.13867e+09	1.75275e+10	4615.38	1	0.0508	3.93984
13.516	-81.349	Tropical Atlantic	2005-11-15	5	0	1.25	11.73	0.37	1.58909	0.623556	0.833925	6.19179	6.64158	7.07732	1.56513e+09	1.56513e+09	1.12542e+10	14011.7	1	0.0562423	3.76004
12.064	93.0589	Western Indo-Pacific	2016-05-09	75	3.96	1.78	10.57	0.6	1.03545	-1.41848	-0.767413	4.61868	5.4767	5.78093	0	0	3.034e+09	693.51	2	0.0489	3.65219
12.2014	-83.0731	Tropical Atlantic	2003-06-15	5	1.17	2.01	14.3	0.72	1.68724	0.470274	0.685833	5.88271	6.10078	6.17331	0	0	4.81289e+09	2389.05	2	0.0602	3.67476
21.6457	-72.4746	Tropical Atlantic	1999-08-15	5	0	0.86	5.12	0.31	1.0169	1.09638	0.410492	6.5261	6.97447	6.9769	0	7.90332e+08	2.09151e+10	131.87	0	0.0576	4.00495
7.2143	134.227	Central Indo-Pacific	1998-09-15	75	11.13	1.85	15.5	0.77	2.22852	0.0448351	0.330486	4.3762	5.23686	5.58451	0	7.16973e+06	5.03754e+09	2655.55	0	0.0624	3.85079
24.685	-80.9224	Tropical Atlantic	2008-09-24	5	1.45	0.83	5.34	0.29	0.0255623	1.76736	-0.563346	6.24107	6.92242	6.46198	4.70594e+08	6.1694e+08	1.32789e+10	8270	2	0.0881	3.90301
28.4681	129.626	Central Indo-Pacific	2005-07-02	30	0	1.57	10.77	0.51	-1.10548	2.71529	0.0651657	7.60657	8.05943	7.30074	0	4.13596e+09	6.11062e+10	441.87	0	0.0381485	3.5487
26.1294	127.799	Central Indo-Pacific	2008-08-30	5	0	1.04	10.1	0.26	-0.699052	2.42399	-0.1448	6.07214	7.29255	7.35157	2.19351e+07	9.5086e+08	9.24884e+10	849.16	0	0.0495	3.60278
-18.9	178.1	Central Indo-Pacific	1999-06-15	30	0	1.06	7.82	0.35	-1.15975	-0.902266	0.124086	6.59152	6.9106	7.26361	0	0	9.34419e+09	11918.7	2	0.0341	3.94811
-18.1017	179.263	Central Indo-Pacific	2016-03-08	30	3.34	0.94	6.26	0.37	-1.08483	-0.971565	0.0987321	6.56112	7.19728	6.78301	7.45704e+08	7.45704e+08	9.35605e+09	4873.83	2	0.08	3.98144
-17.5717	178.988	Central Indo-Pacific	2016-03-09	5	3.05	0.91	6.49	0.4	-1.05318	-0.978186	0.0955124	6.17906	7.03291	6.65799	2.90107e+09	2.90107e+09	1.21164e+10	2167.35	0	0.0548589	3.98144
-9.5364	50.9956	Western Indo-Pacific	1998-04-15	30	12.51	1.76	14.13	0.69	-1.15206	-0.789976	-0.0445314	5.97554	7.6833	7.47068	0	0	1.21369e+10	204.6	0	0.514259	3.78057
-9.4476	46.3991	Western Indo-Pacific	1998-04-15	30	4.38	1.2	7.1	0.42	-1.20688	-0.767025	-0.200751	5.32085	6.60185	6.48923	0	0	1.11957e+09	336.01	2	0.04	3.79389
-17.7397	168.294	Central Indo-Pacific	2004-02-03	5	0	0.98	10.8	0.29	-0.881166	-1.07299	0.2712	7.21295	7.38859	7.32451	0	0	2.94728e+10	524.95	0	0.0343	3.90988
-17.0667	178.595	Central Indo-Pacific	2016-03-13	5	6.33	1.06	7.79	0.35	-0.93435	-1.04582	0.0886795	6.81528	7.71934	7.12141	2.04397e+09	2.04397e+09	1.2629e+10	12462.1	2	0.0569	4.00191
-9.2126	51.0359	Western Indo-Pacific	1998-04-15	75	4.54	1.48	9.76	0.57	-1.08749	-0.837197	-0.0669116	5.74203	7.53566	7.3501	0	0	6.69881e+09	403.69	1	0.0803	3.78415
22.55	-78.04	Tropical Atlantic	2003-10-15	5	0	0.86	6.83	0.27	0.662707	1.2829	-0.0932563	6.22547	6.27397	6.37819	0	3.59131e+06	1.67163e+10	14053.2	1	0.0346153	3.94825
-7.0113	52.7348	Western Indo-Pacific	1998-04-15	75	1.22	0.83	4.34	0.32	-0.753796	-1.14855	-0.213104	5.23273	6.94933	6.52164	0	0	7.65708e+08	378.43	0	0.0513	3.79172
18.605	-87.2483	Tropical Atlantic	2000-07-14	5	0	0.96	6.34	0.3	1.35084	0.803343	0.443066	7.23523	6.98605	6.91539	0	8.04309e+07	2.19765e+10	6106.44	2	0.0339	3.78611
16.5175	-87.9666	Tropical Atlantic	2004-08-10	5	0	1.39	9.89	0.64	1.37586	0.629577	0.150242	6.81164	6.2121	5.33364	0	3.88586e+06	1.1329e+10	10497	2	0.061	3.74429
12.3	-81.717	Tropical Atlantic	2005-09-15	5	6.43	1.86	18.21	0.56	1.65004	0.555694	0.77167	5.13187	6.03919	6.36025	0	0	4.39313e+09	19577	2	0.0287	3.68501
13.54	120.76	Central Indo-Pacific	1998-08-15	75	4.41	1.76	13.57	0.52	1.48339	0.319432	-0.309424	2.23375	3.22628	5.12211	0	7.86059e+07	3.06004e+10	7975.02	0	0.0725	3.73959
16.31	119.77	Central Indo-Pacific	1998-08-15	75	3.38	1.37	9.09	0.5	1.59003	0.119246	-0.477117	3.65087	4.28776	5.43011	8.38576e+07	4.8402e+08	4.74186e+10	1038.27	2	0.0305	3.71587
10.5766	72.6271	Western Indo-Pacific	2016-04-30	75	0	0.8	5.61	0.24	0.521773	-2.05153	-0.633386	3.52976	4.5849	5.08672	0	2.54981e+07	3.02745e+09	1226.93	2	0.0524	3.79912
9.0889	118.227	Central Indo-Pacific	1998-08-15	75	1.22	1.06	9.56	0.29	1.86625	-0.202776	-0.304776	3.27242	4.11523	5.04401	0	5.95331e+07	3.4444e+09	7376.04	0	0.0648	3.75276
7.4417	134.3	Central Indo-Pacific	1998-09-15	75	7.32	1.56	13.04	0.6	2.20841	0.0592847	0.320997	4.42598	5.28546	5.70765	0	8.90904e+06	5.6168e+09	17938.8	2	0.0636	3.85079
-9.7951	159.8	Central Indo-Pacific	2000-03-15	5	0	1.44	14.28	0.44	0.379638	-1.95307	0.0333638	5.2733	5.40889	6.19226	0	0	3.19633e+09	1428.83	1	0.0476	3.94343
-9.795	159.8	Central Indo-Pacific	2000-03-15	5	0	1.44	14.28	0.44	0.379638	-1.95307	0.0333638	5.2733	5.40889	6.19226	0	0	3.19615e+09	1385.65	2	0.0476	3.94343
24.4512	-82.1557	Tropical Atlantic	2007-10-11	30	1.2	0.93	10.39	0.27	-0.115161	1.91793	-0.524915	5.39429	6.47545	6.19421	4.27244e+07	4.27244e+07	1.77651e+10	10747	2	0.0543	3.89426
17.4648	-62.9667	Tropical Atlantic	1999-12-15	5	1.2	0.9325	8.5675	0.2525	1.26166	0.890518	0.65157	7.0953	7.01192	7.14653	9.99612e+09	9.99612e+09	3.26869e+10	77.68	1	0.0309	3.99859
18.468	-66.098	Tropical Atlantic	2005-12-15	30	3.67	0.83	7.17	0.24	1.19538	0.954524	0.675042	7.05625	7.10462	7.31244	6.23162e+06	6.23162e+06	2.43202e+10	204.36	2	0.0584	4.00184
9.706	-75.866	Tropical Atlantic	2005-08-15	5	4.22	1.26	10.34	0.5	1.98559	0.260973	0.1849	4.61271	5.39632	4.65948	0	0	4.58541e+08	1750.68	0	0.0974	3.67094
21.4893	-72.2243	Tropical Atlantic	1999-08-15	5	0	0.83	7.78	0.23	0.990593	1.10219	0.359494	6.60507	7.07852	7.00527	0	8.15442e+08	2.12241e+10	2885.58	0	0.0366	3.99986
21.8343	-72.341	Tropical Atlantic	2007-08-10	30	0	0.7	5.21	0.22	0.910164	1.14773	0.291558	6.8515	6.75642	6.94871	0	1.7669e+06	1.94708e+10	377.45	0	0.0714	4.00495
-1.2239	-90.5017	Tropical Eastern Pacific	1998-03-15	75	33.26	4.97	38.64	1.49	-2.87078	0.215187	0.529396	4.89794	5.18712	4.2309	0	0	0	2775.36	2	0.0692	3.11761
24.5696	-82.925	Tropical Atlantic	2016-09-14	30	0	0.79	8.53	0.19	-0.173275	1.9863	-0.493848	5.3296	6.37348	6.18967	1.48165e+08	1.48165e+08	1.89632e+10	6545	2	0.0571	3.87219
-13.5002	47.8825	Western Indo-Pacific	2016-04-18	75	4.44	0.91	6.25	0.31	-0.56	-1.3671	-0.333252	4.32043	4.20051	3.79297	0	0	7.46776e+09	8768.03	1	0.0628	3.77298
21.0757	-79.4677	Tropical Atlantic	2001-08-26	5	0	0.97	6.35	0.33	1.07688	0.998021	-0.230048	5.28707	6.03618	5.84616	0	5.25449e+07	9.97444e+09	4473.7	2	0.0397	3.92602
12.0126	93.0833	Western Indo-Pacific	2016-05-13	75	6.95	1.86	17.46	0.53	1.0077	-1.44899	-0.769176	4.61868	5.4767	5.78093	0	0	2.98066e+09	5527.57	2	0.047913	3.65219
-7.01	52.73	Western Indo-Pacific	1998-02-15	75	1.22	0.83	4.34	0.32	-0.753796	-1.14855	-0.213104	6.45367	6.75641	6.52164	0	0	7.66349e+08	44.27	0	0.0513	3.79172
17.8607	-87.9732	Tropical Atlantic	2005-06-12	5	0	1.28	8.3	0.55	1.27619	0.695199	0.135075	5.91962	5.62413	6.17492	0	0	2.11899e+10	3023.83	2	0.0434	3.75838
-4.96	119.28	Central Indo-Pacific	2010-05-15	75	0	1.38	8.62	0.72	0.414574	-1.99275	0.225066	4.16552	5.0339	5.02776	0	0	0	1069.52	0	0.0707	3.80183
21.6533	-79.9278	Tropical Atlantic	2001-08-15	5	0	0.65	4.1	0.19	1.13298	0.999947	-0.18081	5.32462	5.8366	5.87383	0	4.1635e+07	1.03347e+10	4075.76	2	0.0684	3.92042
6.48331	117.893	Central Indo-Pacific	2010-06-17	5	5.45	1.3	7.18	0.65	2.00755	-0.130713	-0.299254	4.90726	4.99693	4.50504	0	0	7.04572e+08	3615.58	1	0.0757321	3.77292
-17.9167	178.583	Central Indo-Pacific	2000-05-15	30	4.96	1.63	8.07	0.72	-1.11717	-0.911541	0.137773	6.03195	6.60748	6.72706	2.37019e+08	2.37019e+08	1.02757e+10	195.59	0	0.138428	3.98144
23.2422	-80.5878	Tropical Atlantic	2001-05-25	5	0	1.44	8	0.64	0.560945	1.30907	-0.217677	7.60495	6.85148	6.10226	0	8.31562e+06	1.52504e+10	2312.34	1	0.10194	3.90998
17.8935	-62.8551	Tropical Atlantic	2018-08-03	5	0	0.95	5.89	0.27	1.16598	0.959454	0.678353	7.88408	7.79233	7.29883	2.27067e+07	6.8315e+09	3.91295e+10	308.69	0	0.0333934	4.01832
18.3408	-65.0825	Tropical Atlantic	2003-09-27	5	0	0.8	9.51	0.18	1.20404	0.935441	0.610968	7.45093	7.15208	7.03153	1.47274e+06	1.47274e+06	2.84481e+10	32.49	0	0.0500907	4.00777
17.767	-64.828	Tropical Atlantic	2006-04-15	75	0	1.14	10.26	0.28	1.26254	0.893192	0.604438	7.28847	6.8224	7.19209	2.40606e+06	2.40606e+06	3.23751e+10	256.32	2	0.0352	4.00777
12.9932	-61.2757	Tropical Atlantic	2005-02-15	5	0	1.06	10.62	0.35	1.35161	0.813804	0.904672	6.2455	6.83704	7.2196	7.51835e+08	9.05556e+08	9.05013e+09	48.15	0	0.0508	3.91063
-8.23847	125.612	Central Indo-Pacific	2017-06-17	5	0	2.04	12.61	0.91	0.307736	-1.66258	0.470108	5.28275	4.97265	4.41002	1.261e+07	1.261e+07	5.59851e+08	402.5	0	0.046	3.82408
-5.235	151.023	Central Indo-Pacific	1999-04-15	5	0	1.62	10.02	0.59	0.839786	-2.22575	0.339341	0.83972	0.943553	3.47317	0	0	1.95433e+07	1443.13	1	0.0444	3.92211
24.8947	-77.5401	Tropical Atlantic	2008-08-09	5	0	0.4	2.85	0.1	0.282689	1.67206	-0.144894	5.96779	6.14341	5.92082	0	7.76911e+08	1.70498e+10	11707.5	0	0.140706	3.93984
17.914	-67.223	Tropical Atlantic	2003-10-15	75	0	0.69	5.86	0.19	1.39772	0.804263	0.512186	7.04351	7.02018	7.01206	1.95272e+07	1.95272e+07	1.66259e+10	3566.74	2	0.0593	3.99539
19.7141	-79.9578	Tropical Atlantic	1999-06-15	5	0	0.69	4.48	0.21	1.34222	0.836482	0.0635837	6.55912	6.65683	6.4879	0	2.86017e+08	1.1859e+10	902.72	1	0.0266	3.90209
10.883	-68.212	Tropical Atlantic	2005-12-15	5	9.03	1.48	15.4	0.43	1.04088	1.01955	1.0939	6.69614	6.88079	6.98243	1.16948e+07	1.16948e+07	9.79597e+08	65.69	0	0.0863	3.78938
9.87	122.37	Central Indo-Pacific	1998-08-15	75	8.08	1.575	12.3875	0.5325	1.67569	0.179707	-0.246006	3.59657	4.3316	5.52428	0	2.09548e+07	8.96722e+09	427.77	2	0.0478514	3.7708
9.4277	-78.5918	Tropical Atlantic	2002-06-15	5	0	2.11	17.02	0.71	1.642	0.505231	0.462353	7.03157	6.19356	5.7966	0	0	5.8344e+08	25.53	0	0.0873	3.59991
19.654	-80.104	Tropical Atlantic	2005-08-15	30	0	0.6	4.67	0.17	1.34581	0.83506	0.0696824	5.94532	6.63065	6.4879	1.6491e+08	2.26004e+09	1.21422e+10	427.29	2	0.0268	3.90209
16.33	-88.126	Tropical Atlantic	2005-10-15	30	5.83	1.8	10.42	0.81	1.37223	0.589107	0.0595598	6.01708	6.029	5.1659	4.4509e+07	4.4509e+07	1.23336e+10	25011.6	2	0.104762	3.72694
-17.9813	-38.6606	Tropical Atlantic	2005-04-05	5	0	0.65	4.6	0.15	-1.30635	-0.946519	0.520317	6.43247	6.45941	6.20724	0	0	2.32861e+08	3715.91	2	0.0821	3.96834
21.9311	-77.5378	Tropical Atlantic	2001-06-15	5	0	1.74	9.43	0.66	0.796606	1.20562	0.11595	7.51275	7.28712	6.40713	0	3.3678e+07	1.38825e+10	2743.6	2	0.0391	3.94547
26.64	-77.0393	Tropical Atlantic	1999-08-15	5	1.29	0.64	4.13	0.19	0.0431486	1.82761	-0.0742405	5.58366	6.14997	6.24687	0	3.69373e+08	3.50923e+10	1192.13	2	0.0422	3.91771
19.6437	-156.016	Eastern Indo-Pacific	2008-12-06	5	0	0.9	7.65	0.27	0.52492	1.40025	1.21049	5.6	5.74896	5.81858	0	0	1.79557e+09	264.97	2	0.0235	3.74578
24.3124	124.104	Central Indo-Pacific	2016-10-09	30	7.92	1.11	9.28	0.33	-0.157096	1.88438	-0.305661	5.9382	7.44983	7.67109	7.70641e+08	7.70641e+08	9.06557e+10	937.73	2	0.110684	3.62713
-18.7125	-174.108	Eastern Indo-Pacific	2013-07-08	5	0	1.13	9.58	0.38	-1.15397	-0.896738	0.25666	6.6253	6.92639	7.02083	0	0	7.18017e+09	625.2	0	0.0296	3.99961
-22.6229	43.2573	Western Indo-Pacific	2016-03-17	75	1.06	1.35	9.56	0.53	-1.40097	-0.505892	-0.263509	6.30837	6.78289	7.03974	0	0	1.06655e+10	4500.74	2	0.0966	3.70075
-22.12	43.2	Western Indo-Pacific	2008-08-15	5	0	1.09	7.71	0.36	-1.30455	-0.56676	-0.277691	7.38762	7.02124	6.74393	3.40605e+08	4.19966e+08	1.22558e+10	2535.55	2	0.108471	3.71653
-17.17	178.229	Central Indo-Pacific	2016-03-12	5	1.44	1.01	9.38	0.41	-0.931448	-1.03361	0.0705213	6.992	7.79837	7.24105	1.52879e+09	1.52879e+09	1.24109e+10	11889.1	2	0.0439	3.99514
15.8726	-61.31	Tropical Atlantic	2012-12-17	5	0.44	0.868	7.062	0.264	1.29305	0.862342	0.826081	6.27329	6.92203	7.01636	9.80409e+08	9.80409e+08	1.81233e+10	658.06	0	0.0304	3.98686
16.43	-61.54	Tropical Atlantic	2007-04-15	5	0	0.83	6.9	0.22	1.27522	0.880624	0.76028	6.96955	6.88091	6.7634	0	2.28342e+07	2.11826e+10	321.37	0	0.0354833	3.98193
16.4312	-61.5429	Tropical Atlantic	2007-04-27	5	0	0.75	5.34	0.21	1.27522	0.880624	0.76028	6.96955	6.88091	6.7634	0	2.28057e+07	2.1193e+10	655.61	0	0.0355	3.98193
11.137	-60.84	Tropical Atlantic	2005-11-15	75	3.11	1.21	11.46	0.41	1.32759	0.831917	0.860254	5.86042	6.32902	6.83608	9.48167e+08	9.48167e+08	4.74617e+09	832.09	0	0.0748	3.84926
11.223	-60.784	Tropical Atlantic	2005-10-15	75	1.14	0.94	6.25	0.27	1.32362	0.836819	0.855728	5.8031	6.33949	6.83608	1.09885e+09	1.09885e+09	5.24416e+09	341.6	2	0.0842	3.84926
11.132	-60.79	Tropical Atlantic	2005-11-15	75	4.40857	1.23429	9.98857	0.451429	1.33089	0.830923	0.853274	5.86042	6.32902	6.83608	9.70846e+08	9.70846e+08	4.75235e+09	255.93	2	0.212072	3.84926
14.447	-60.905	Tropical Atlantic	2005-12-15	75	7.92	1.02	8.57	0.29	1.34354	0.822004	0.866157	6.57331	6.82195	7.32999	9.7999e+07	9.7999e+07	1.3072e+10	521.4	0	0.0366	3.93797
17.96	-66.769	Tropical Atlantic	2005-12-15	75	1.28	0.54	4.21	0.13	1.36275	0.829527	0.584293	6.65767	6.69121	7.30154	1.70644e+07	1.70644e+07	1.8061e+10	1825.31	2	0.102425	3.99539
21.5933	-81.9235	Tropical Atlantic	2004-07-21	30	0	1.22	10.52	0.38	1.01257	0.971659	-0.39229	6.37395	6.447	6.25659	0	0	1.82662e+10	1402.37	2	0.0582	3.89238
13.3153	-81.3743	Tropical Atlantic	2019-03-16	5	0	1.24	10.54	0.39	1.59791	0.615964	0.82225	7.22667	7.17854	7.0204	0	0	8.80229e+09	1002.43	0	0.0344	3.72896
16.1411	-88.2441	Tropical Atlantic	2007-04-04	5	0	1.64	10.84	0.74	1.35639	0.547197	-0.0326258	5.77964	6.17518	5.1659	0	0	1.06014e+10	951.61	2	0.0592	3.72694
10.0622	125.134	Central Indo-Pacific	2010-05-13	5	0	1.892	15.722	0.792	1.66348	0.365557	-0.0116697	5.78537	5.99753	5.10825	2.62042e+07	5.53101e+07	1.69892e+10	117.38	0	0.0573	3.79033
10.0669	125.135	Central Indo-Pacific	2010-01-22	5	0.26	1.892	15.722	0.792	1.66348	0.365557	-0.0116697	6.13767	5.92911	5.10825	2.62006e+07	6.89141e+07	1.70457e+10	26.83	0	0.0582	3.79033
10.0669	125.134	Central Indo-Pacific	2010-05-14	5	0	1.892	15.722	0.792	1.66348	0.365557	-0.0116697	5.78537	5.99753	5.10825	2.61805e+07	5.54038e+07	1.70434e+10	61.32	0	0.0582	3.79033
10.0232	125.068	Central Indo-Pacific	2006-11-30	5	0	1.86	15.32	0.76	1.66399	0.369156	-0.0167717	6.29213	5.75877	5.49229	8.72205e+07	1.6353e+08	1.6246e+10	4610.66	0	0.0525	3.79033
10.0113	125.016	Central Indo-Pacific	2006-09-09	5	0	1.91	14.86	0.78	1.66954	0.365793	-0.0267679	5.78793	5.57734	5.49229	4.6792e+07	9.02407e+07	1.59307e+10	238.89	0	0.0513578	3.79033
10.0201	125.009	Central Indo-Pacific	2007-08-29	5	4.62	1.91	14.86	0.78	1.66954	0.365793	-0.0267679	5.24074	5.65864	5.49229	0	1.62037e+08	1.60173e+10	391.46	0	0.0513578	3.79033
10.25	-75.63	Tropical Atlantic	2005-09-15	30	1.53	2.18	27.4	0.66	1.79998	0.481922	0.292206	4.45226	5.73837	5.78788	0	0	6.99313e+08	906.55	0	0.100186	3.67094
10.155	-75.803	Tropical Atlantic	2005-08-15	5	5.32	1.65	10.94	0.67	1.82888	0.433046	0.282035	4.78309	5.74625	5.78788	0	0	6.74212e+08	1168.7	0	0.104665	3.67094
12.1961	93.0847	Western Indo-Pacific	2016-05-10	75	3.53	1.35	10.13	0.47	1.06843	-1.37549	-0.768587	4.5963	5.43611	5.72181	0	0	3.13959e+09	93.68	0	0.0468	3.65219
-10.2846	166.27	Central Indo-Pacific	2010-06-06	5	1.12875	1.475	10.5475	0.6675	0.303679	-1.91124	0.122958	5.05967	6.24949	6.16017	0	0	1.87402e+09	2212.89	0	0.0837	3.95989
5.29	73.11	Western Indo-Pacific	2008-01-15	5	0	1.09	8.73	0.32	0.842592	-1.79868	-0.774737	5.23448	4.95602	5.01496	0	0	3.09004e+08	334.52	0	0.0745	3.88657
11.9453	102.283	Central Indo-Pacific	2006-11-13	5	0	1.12	7.8	0.32	1.33097	-1.41433	-0.903137	6.09073	5.15886	5.01448	0	0	8.08291e+08	3641.79	2	0.0606	3.64837
-2.94125	135.667	Central Indo-Pacific	2010-07-23	5	0	2.27	13.69	1.02	1.5587	-0.808319	1.30962	3.5602	3.90828	3.7033	0	0	2.51415e+06	555.29	0	0.0907	3.87358
-3.10183	135.623	Central Indo-Pacific	2010-07-20	30	0	1.49	11.31	0.56	1.40328	-1.01815	1.22964	3.51508	3.84385	3.82992	0	0	1.24994e+07	410.27	0	0.088	3.87358
21.3034	-71.2231	Tropical Atlantic	1999-08-15	5	0	0.62	5.94	0.14	0.989514	1.13374	0.545436	6.91282	7.30016	7.24671	0	1.00507e+09	2.25085e+10	293.95	0	0.0539	4.00824
-18.6223	178.555	Central Indo-Pacific	2000-04-15	5	5.88	1.02	7.15	0.35	-1.19581	-0.882701	0.136016	5.92724	6.8838	6.82662	2.47102e+08	2.47102e+08	8.3117e+09	13341.9	0	0.0403	3.9548
18.1334	-76.3308	Tropical Atlantic	2000-08-11	5	0	1.136	8.698	0.33	1.52028	0.720022	0.488645	6.84983	6.99395	6.90079	0	1.95342e+08	1.08508e+10	286.97	2	0.0309	3.91706
-7.93487	156.945	Central Indo-Pacific	2016-03-15	30	0	2.12667	18.83	0.763333	0.484225	-2.0563	-0.00166769	4.95105	5.99079	5.49839	0	8.96067e+07	6.19545e+08	164.13	0	0.0459	3.93665
-7.8414	157.078	Central Indo-Pacific	2016-03-17	30	0.5275	1.6725	15.2025	0.79	0.492886	-2.04037	0.0089138	4.63379	5.39873	5.19161	0	1.06922e+08	5.97028e+08	136.94	0	0.0389	3.93665
-17.1114	179.101	Central Indo-Pacific	2002-02-15	5	1.23	0.91	9.96	0.26	-0.979381	-1.0364	0.0641585	6.03181	6.2056	6.70512	0	0	1.23316e+10	37.34	0	0.0558	4.00191
13.292	-59.663	Tropical Atlantic	2005-09-15	75	0	0.88	7.8	0.25	1.36099	0.804658	0.905526	6.18027	6.41092	7.36315	2.56119e+08	2.56119e+08	9.63646e+09	1499.36	0	0.0383	3.9168
21.8302	-72.1725	Tropical Atlantic	2007-08-07	5	0	0.86	4.4	0.34	0.824714	1.17745	0.220871	6.8515	6.75642	6.94871	0	0	1.9506e+10	1795.92	2	0.0377	4.00495
20.8982	-79.0953	Tropical Atlantic	2001-08-15	5	0	1.01	6.26	0.37	1.09457	0.977312	-0.250164	4.86754	5.61083	5.66319	0	6.92113e+07	8.63636e+09	515.79	2	0.0336	3.92602
25.3331	-80.1504	Tropical Atlantic	2011-10-03	30	2.2	0.62	5.05	0.18	0.153682	1.66873	-0.422177	5.33935	6.19638	6.34839	1.61479e+08	1.67115e+08	1.2431e+10	9404	2	0.0482	3.91656
12.1863	-83.0684	Tropical Atlantic	2003-06-15	5	1.17	2.01	14.3	0.72	1.69047	0.473387	0.696872	5.88271	6.10078	6.17331	0	0	4.7854e+09	784.96	0	0.0602	3.67476
-28.8645	114.001	Temperate Australasia	2005-09-13	5	0	2.88	31.68	0.85	-3.12112	0.367971	1.25162	8.04937	8.24611	8.32457	0	0	5.48387e+08	9.47	0	0.0638	3.44341
27.2948	33.8307	Western Indo-Pacific	2008-03-20	5	0	1.74	11.28	0.63	-0.486633	2.22635	0.660915	6.46094	5.93014	6.12961	0	0	0	3856.15	1	0.047	3.63516
24.5402	-77.6821	Tropical Atlantic	1998-08-15	5	0	0.66	5	0.18	0.359193	1.61802	-0.0546105	4.92583	5.669	5.47467	0	0	1.49669e+10	4647.5	0	0.0445	3.93984
-18.2203	177.713	Central Indo-Pacific	2003-07-23	5	0	0.81	5.44	0.26	-0.915258	-1.09127	0.0937996	7.48578	7.91221	7.24594	5.34916e+07	2.42317e+08	1.01523e+10	620.76	2	0.0338	3.97467
-16.391	179.168	Central Indo-Pacific	2004-12-09	5	0	1.16	6.51	0.52	-0.531249	-1.28326	0.0523508	6.89956	6.60222	6.20395	0	3.85645e+07	9.49053e+09	72.46	0	0.126798	4.01618
14.5211	-61.0962	Tropical Atlantic	2009-05-24	5	0	0.7	7.26	0.14	1.37509	0.803055	0.824474	8.03569	7.33403	7.32999	0	0	1.26966e+10	85.78	0	0.0376	3.96338
17.563	-87.475	Tropical Atlantic	2005-10-15	30	3.13	0.91	6.21	0.3	1.38885	0.755374	0.447418	5.75412	6.26745	6.65626	2.0593e+08	2.0593e+08	2.85026e+10	11404.3	2	0.0297	3.77385
17.93	-67.096	Tropical Atlantic	2005-12-15	30	0	0.56	3.74	0.16	1.38642	0.813672	0.540463	6.52119	6.63256	7.13058	2.16391e+07	2.16391e+07	1.74376e+10	267.66	2	0.165553	3.99539
-16.1502	-145.82	Eastern Indo-Pacific	2005-07-27	5	0	1.18	8.52	0.37	-0.26852	-1.6628	-0.115168	6.2785	6.31186	6.48661	0	0	3.72339e+08	1417.92	0	0.0538	4.09482
19.3577	-81.1358	Tropical Atlantic	1999-06-15	5	0	0.81	5.44	0.27	1.39081	0.801305	0.156305	6.89928	6.97905	6.69822	0	5.3925e+08	1.41322e+10	456.47	2	0.0293	3.87473
5.20214	114.769	Central Indo-Pacific	2016-05-20	5	1.07	0.7	5.55	0.2	1.83641	0.176505	-0.334275	5.89277	5.05332	4.93474	0	0	9.27901e+08	27759	2	0.0929	3.76691
7.81192	98.7711	Western Indo-Pacific	2006-09-21	5	0	1.5	11.46	0.6	1.23396	-1.48172	-1.02856	5.0998	5.27946	5.04661	0	707629	5.66587e+08	18.17	0	0.0924	3.70503
25.3929	-78.1294	Tropical Atlantic	2013-09-08	5	0	0.71	4.71	0.24	0.0971896	1.72396	-0.394116	5.54568	5.81202	5.40286	1.29844e+08	1.15516e+09	1.76382e+10	6988.14	1	0.0759	3.93984
12.5929	-81.7408	Tropical Atlantic	2018-10-14	5	6.76	1.24	9.75	0.38	1.63403	0.576483	0.792329	6.52381	7.05284	6.49164	0	0	4.54896e+09	2529.77	0	0.0308	3.71843
17.7879	-71.6658	Tropical Atlantic	2004-07-15	5	0	0.57	4.98	0.13	1.55664	0.689268	0.628319	9.09072	8.38162	8.38256	0	5.06369e+08	7.46764e+09	607.1	0	0.0363	3.95643
18.1334	-76.3308	Tropical Atlantic	2000-08-11	5	0	1.136	8.698	0.33	1.52028	0.720022	0.488645	6.84983	6.99395	6.90079	0	1.95346e+08	1.0851e+10	273.962	2	0.0309	3.91706
11.326	-74.128	Tropical Atlantic	2005-11-15	5	0.835	1.84	15.26	0.5825	1.05671	1.01728	0.632288	6.80216	8.41619	7.70744	0	0	1.01299e+09	71.42	0	0.2574	3.73012
20.6268	-78.5966	Tropical Atlantic	2001-08-15	5	1	1.06	7.1	0.4	1.1365	0.925563	-0.296497	4.95106	5.56435	5.58384	0	8.65716e+07	8.26562e+09	1491.66	2	0.226681	3.92602
10.234	-75.746	Tropical Atlantic	2006-02-15	5	0	1.59	12.02	0.63	1.81419	0.458344	0.286387	6.11056	5.44682	5.78788	0	0	7.0468e+08	607.86	1	0.0879	3.67094
19.7472	-79.7236	Tropical Atlantic	2000-06-15	5	0	0.77	4.86	0.27	1.35261	0.828524	0.071017	6.42012	6.61621	6.43414	0	9.21971e+07	1.15876e+10	83.14	2	0.0263001	3.90209
3.61964	73.3724	Western Indo-Pacific	2019-09-12	5	0	1.12	8.85	0.35	1.01882	-1.66485	-0.808001	4.19314	4.31187	4.95243	0	0	6.22682e+07	8082.42	0	0.0871	3.88709
21.4543	-79.6459	Tropical Atlantic	2001-08-27	5	0	0.81	8.39	0.2	0.971478	1.0776	-0.326052	5.30248	5.91443	5.85332	0	3.85718e+07	9.51974e+09	6815.55	2	0.0449	3.91317
26.3554	126.854	Central Indo-Pacific	2013-08-30	30	1.78	1.36	12.53	0.37	-0.65143	2.34914	-0.163655	6.53765	7.4722	7.58587	1.29094e+08	1.90441e+09	1.18189e+11	1869.53	2	0.044	3.59598
20.7879	-156.991	Eastern Indo-Pacific	2009-05-03	5	0	1.17	10.51	0.3	0.427709	1.47807	1.19772	7.76343	7.52002	7.41824	0	0	1.73973e+09	21.81	2	0.0244	3.74922
19.9592	-155.86	Eastern Indo-Pacific	2008-11-22	5	0	1.14	15.39	0.22	0.476831	1.43623	1.22919	5.46872	5.67521	6.37257	0	0	1.76083e+09	157.16	2	0.0268	3.74578
24.6144	124.307	Central Indo-Pacific	2009-08-24	30	1.5	1.28	11.51	0.37	-0.205527	1.91592	-0.316017	6.96192	7.50387	7.66954	2.70922e+08	1.92941e+09	8.72416e+10	730.63	2	0.0516	3.60258
24.4846	124.124	Central Indo-Pacific	2009-04-28	5	0	1.65	10.78	0.59	-0.182229	1.8856	-0.319979	8.38078	7.59365	7.67808	0	2.62414e+09	8.87501e+10	497.84	1	0.0506	3.62713
-22.7865	43.3346	Western Indo-Pacific	2016-03-20	75	0	1.2	6.3	0.46	-1.41808	-0.497127	-0.255915	6.45226	6.83562	7.17877	0	0	9.8219e+09	1751.8	2	0.0643	3.70075
-22.7396	43.3162	Western Indo-Pacific	2016-03-20	75	0	1.39	9.76	0.46	-1.41362	-0.499696	-0.260793	6.45226	6.83562	7.17877	0	0	1.00452e+10	2481.23	2	0.0811	3.70075
15.9772	108.501	Central Indo-Pacific	2004-06-01	5	0	1.33	8.75	0.53	0.023287	1.69749	-0.544441	5.47414	5.82293	5.90799	0	1.7323e+08	2.02004e+10	30.51	0	0.140158	3.63583
-22.4401	43.2391	Western Indo-Pacific	2016-03-21	75	1.27	1.26	9.42	0.44	-1.36887	-0.524108	-0.265657	6.30837	6.78289	7.03974	0	0	1.1588e+10	3090.15	2	0.0688	3.71653
-18.9197	-159.847	Eastern Indo-Pacific	2005-08-26	5	0	1.52	15.93	0.49	-0.804965	-1.25666	0.179289	7.10916	7.1076	6.86797	0	1.61661e+09	6.50445e+09	1090.4	2	0	4.05894
-18.82	-159.78	Eastern Indo-Pacific	2005-08-24	5	0	1.6	15.54	0.53	-0.782291	-1.27475	0.159908	7.09226	7.06814	6.84496	0	1.59328e+09	6.99974e+09	735.05	2	0.0232	4.05894
-18.1599	177.428	Central Indo-Pacific	2012-06-03	5	0	0.875	5.0175	0.3075	-0.83581	-1.13355	0.0524356	7.2975	7.29257	7.33767	3.68076e+07	3.68076e+07	1.17497e+10	936.6	2	0.0365	3.96798
22.0705	121.508	Central Indo-Pacific	2016-04-30	30	0	1.01571	7.90571	0.35	0.509423	1.09419	-0.420499	9.15777	8.11663	8.43457	0	7.8164e+08	6.59243e+10	112.54	2	0.036	3.65319
11.793	-66.895	Tropical Atlantic	2005-10-15	5	1.37	0.92	6.5	0.26	1.02901	1.04039	1.04023	6.24535	6.50388	7.29895	3.88671e+07	3.88671e+07	2.16185e+09	46.54	0	0.14688	3.83345
-9.4833	147.183	Central Indo-Pacific	1999-04-15	75	0	2.07333	18.9033	0.76	-0.904428	-0.96415	-0.12288	5.24626	7.06353	7.3581	0	0	2.14913e+09	906.82	0	0.119202	3.90637
21.485	-71.508	Tropical Atlantic	2005-11-15	75	4.85	0.76	4.99	0.19	0.958821	1.13806	0.503793	6.75155	6.77451	7.04988	2.15161e+08	2.15161e+08	2.11823e+10	244.22	2	0.0362	3.99986
12.1658	-68.3267	Tropical Atlantic	1999-02-05	30	0	0.85	6.39	0.25	1.18088	0.913598	1.05902	6.53439	6.83841	7.76178	0	0	2.7366e+09	449.28	0	0.0357784	3.82443
18.332	-64.626	Tropical Atlantic	2006-01-15	30	1.3	1.19	12.05	0.35	1.15818	0.965722	0.616167	6.9063	6.68028	7.063	0	0	3.26685e+10	9.83	0	0.0348	4.00777
16.2399	-61.2852	Tropical Atlantic	2008-01-12	5	0	1.07	7.91	0.32	1.25563	0.889761	0.822322	6.84466	7.03938	7.14383	2.67585e+08	2.67585e+08	1.96944e+10	637.66	2	0.0421165	3.98686
23.1275	-82.425	Tropical Atlantic	2004-06-06	5	0	0.87	6.86	0.25	0.897645	1.11641	-0.117122	7.92787	7.32544	6.2046	0	1.74493e+06	1.4622e+10	200.86	2	0.0313	3.89547
-10.305	151.052	Central Indo-Pacific	1996-02-15	5	1.78	1.37	8.81	0.52	-0.446015	-1.27954	0.241704	4.5907	5.62529	6.27635	0	1.14727e+08	2.36086e+09	123.64	0	0.0648	3.9169
13.078	-59.615	Tropical Atlantic	2006-01-15	30	0	1	10.79	0.28	1.36383	0.801674	0.908733	6.73889	6.73454	7.36692	4.66981e+06	3.17841e+08	8.88979e+09	240.42	0	0.0367587	3.9168
18.4343	-69.6252	Tropical Atlantic	2004-07-15	5	0	0.695	4.61	0.225	1.34772	0.82062	0.641844	7.52959	7.0672	6.70788	0	2.10268e+08	1.22423e+10	430.05	2	0.0341	3.97339
18.267	-68.783	Tropical Atlantic	2005-10-15	30	4.04	0.6425	4.2675	0.2025	1.33627	0.828527	0.585814	6.38958	6.88821	7.03149	1.64925e+06	1.64925e+06	1.40305e+10	795.16	1	0.0340433	3.98121
18.2675	-68.7858	Tropical Atlantic	2005-10-08	30	3.49	0.63	4.06	0.21	1.33627	0.828527	0.585814	6.38958	6.88821	7.03149	1.65073e+06	1.65073e+06	1.40711e+10	1098.33	2	0.0340433	3.98121
-10.227	150.887	Central Indo-Pacific	1996-02-15	5	1.39	1.36	9.1	0.54	-0.430171	-1.29643	0.163777	4.5907	5.62529	6.27635	0	1.37303e+08	2.18645e+09	317.02	0	0.0695	3.9169
-10.202	150.864	Central Indo-Pacific	1996-02-15	75	2.32	1.46	10.98	0.56	-0.430171	-1.29643	0.163777	3.86587	4.81069	5.82601	0	1.42928e+08	2.12921e+09	2671.76	0	0.0497	3.9169
-15.3773	168.131	Central Indo-Pacific	2008-06-19	5	0	1.4	12.8	0.38	-0.41804	-1.42171	0.0654658	6.50918	6.7595	6.78914	6.53272e+08	6.53272e+08	2.18536e+10	180.71	0	0.029	3.95679
-10.237	150.698	Central Indo-Pacific	1996-02-15	75	1.39	1.47	11.15	0.58	-0.429547	-1.30231	0.0984945	3.86587	4.81069	5.82601	0	2.11014e+08	2.2217e+09	2177.55	0	0.0447	3.9169
18.056	-67.869	Tropical Atlantic	2005-12-15	30	0.171667	0.708333	4.66167	0.22	1.34244	0.84285	0.564191	6.39266	6.65317	6.94418	3.50924e+07	3.50924e+07	1.50319e+10	414.55	2	0.0335	3.98849
20.3368	-87.0307	Tropical Atlantic	2006-02-02	5	0	0.7225	5.0175	0.205	1.34208	0.808495	0.414573	7.46644	7.04324	6.77804	9.85535e+09	1.06647e+10	2.41907e+10	1035.7	0	0.026	3.79592
17.2261	-87.6047	Tropical Atlantic	2004-08-06	30	0	1.24	8.25	0.44	1.39347	0.728929	0.391242	7.00661	6.5033	6.46531	0	9.18756e+06	2.1695e+10	1047.29	0	0.0397	3.74429
-8.79475	115.527	Central Indo-Pacific	2019-03-29	5	0	1.92	14.35	0.74	-0.265149	-1.53603	0.208794	4.58142	5.42866	5.6655	0	0	3.84865e+08	55.56	2	0.0885	3.78259
-9.968	150.842	Central Indo-Pacific	1996-02-15	75	0	1.44	10.18	0.53	-0.368212	-1.35083	0.0429747	3.77131	4.85168	5.22924	0	1.18764e+08	1.84757e+09	1060.12	0	0.0459	3.9169
21.597	-82.067	Tropical Atlantic	2005-07-15	5	0.87	1.1375	7.3475	0.44375	0.984943	0.986565	-0.420402	6.03622	6.39747	6.25659	2.59783e+08	3.04561e+09	1.791e+10	723.83	0	0.142936	3.89238
-15.9321	-145.881	Eastern Indo-Pacific	2005-07-28	5	0	0.99	9.02	0.31	-0.229397	-1.69163	-0.114867	6.29324	6.32767	6.49625	0	0	3.43256e+08	256.4	2	0.0516	4.09482
18.181	-67.237	Tropical Atlantic	2005-12-15	30	0	0.5	3.48	0.13	1.41258	0.78377	0.400646	6.35354	6.57881	6.77649	1.94935e+07	1.94935e+07	1.773e+10	5782.04	2	0.0775	3.99539
9.10861	-81.5564	Tropical Atlantic	2005-03-13	5	0	3.12	22.2	1.43	1.7713	0.290985	0.521593	5.6235	5.1436	5.12529	0	0	5.18133e+08	495.21	2	0.0728	3.5707
-8.53264	119.644	Central Indo-Pacific	2020-08-15	5					-0.0225079	-1.57967	0.462749	4.13128	4.17352	4.70676	0	0	4.27131e+08	463.78	0	0	3.79681
18.4742	-77.393	Tropical Atlantic	2006-01-01	75	0	1.51	9.17	0.55	1.56244	0.697189	0.377148	6.40828	6.47858	6.46286	3.72334e+08	3.72334e+08	8.23845e+09	505.38	2	0.0277	3.90605
-4.45889	130.029	Central Indo-Pacific	2019-10-13	5	0	1.76	9.18	0.91	-0.157532	-1.3788	0.122188	6.39092	5.49385	5.30544	5.702e+07	5.702e+07	1.13679e+08	10614.5	2	0.0446	3.84785
18.4987	-77.6389	Tropical Atlantic	2012-09-19	5	0	1.03	7.5	0.32	1.58862	0.674708	0.348684	6.39284	6.09504	6.27698	6.24773e+07	6.24773e+07	8.27415e+09	654.49	2	0.0263299	3.89472
-4.59722	129.668	Central Indo-Pacific	2016-04-30	5	1.31	1.77	12.58	0.79	-0.139092	-1.41003	0.111715	3.4788	4.76262	5.30013	0	0	1.43846e+08	3402.58	2	0.0413	3.8469
9.18172	123.258	Central Indo-Pacific	2014-12-14	5	0	2.28	15.66	0.86	1.64419	0.512262	0.155421	4.70266	4.75051	5.04737	1.30571e+08	1.54504e+08	6.98071e+09	137.71	0	0.047	3.78242
-14.259	-169.501	Eastern Indo-Pacific	2002-03-15	5	4.29	3.06	17.45	1.8	0.0838097	-1.87975	0.034149	6.14127	6.50115	6.59376	0	0	7.42925e+09	281.15	2	0.0235	4.09397
18.314	-78.356	Tropical Atlantic	2005-11-15	30	3.14	1.03	6.96	0.33	1.65078	0.623075	0.277145	6.24301	6.10437	6.12011	3.6621e+08	3.6621e+08	1.21844e+10	1844.99	1	0.0294	3.89472
-14.212	-169.455	Eastern Indo-Pacific	2002-05-15	5	5.60857	1.56	10.8543	0.647143	0.0948906	-1.89065	0.0325692	5.90635	6.57121	6.59376	0	0	8.15527e+09	75.47	2	0.0234	4.09857
9.38342	-76.2281	Tropical Atlantic	2017-06-18	5	0	1.42	9.68	0.61	1.79703	0.39694	0.269412	5.22193	4.7647	5.06546	0	5.61437e+06	3.72354e+08	4174.51	2	0.0883	3.63078
18.5053	-73.3408	Tropical Atlantic	2016-01-17	30	0	1.21	11.02	0.35	1.67022	0.627913	0.349125	4.59354	4.89325	6.20979	0	0	7.2539e+09	131.97	2	0.0308	3.96614
8.70469	-83.8667	Tropical Eastern Pacific	2009-02-05	30	0	0.73	4.88	0.21	0.566387	-1.89523	-0.651448	3.98814	3.81362	3.76382	0	2.77794e+07	2.37083e+08	171.78	2	0.0782	3.55234
11.5827	92.5681	Western Indo-Pacific	2016-05-19	75	0	1.3	8.61	0.44	0.943218	-1.5296	-0.772904	4.82269	5.7771	6.10754	0	0	4.06633e+09	550.97	0	0.0729	3.65219
-5.08947	119.317	Central Indo-Pacific	2008-11-08	5	0	1.83	16.68	0.83	0.365196	-1.93007	0.238458	6.43789	5.89776	5.02776	0	0	575886	690	0	0.0847	3.80183
-0.563583	130.519	Central Indo-Pacific	2018-07-06	5	0	2.22	11.82	1.15	0.74462	-1.83897	0.912008	4.71984	4.37006	4.54505	0	0	0	60.01	0	0.148625	3.85216
-0.548028	130.522	Central Indo-Pacific	2018-07-02	5	0	2.22	11.82	1.15	0.794068	-1.7709	0.976526	4.71984	4.37006	4.54505	0	0	0	1800.16	0	0.148625	3.85216
4.55858	118.615	Central Indo-Pacific	2014-03-23	5	0	1.62	13.14	0.83	1.93559	-0.463493	-0.259736	4.60686	3.83064	4.1823	0	0	1.21885e+08	237.19	0	0.113039	3.78338
4.17622	118.307	Central Indo-Pacific	2014-03-26	5	0	0.97	4.81	0.45	2.00684	-0.52209	-0.224335	4.78174	4.01078	4.15338	0	0	8.02107e+07	15725.1	2	0.0858	3.78461
5.70503	115.628	Central Indo-Pacific	2015-08-27	5	1.27	1.6	15.01	0.55	1.92081	0.0977828	-0.371116	3.93612	4.69362	4.24864	0	1.66635e+06	1.14623e+09	2345.9	0	0.147629	3.76403
-8.11472	156.878	Central Indo-Pacific	2005-10-20	30	0	1.28	11.51	0.51	0.445142	-2.03384	-0.0231572	7.66264	6.7396	5.49839	0	0	7.14661e+08	148.76	0	0.0502	3.93665
-8.13276	157.158	Central Indo-Pacific	2016-03-23	30	0	1.66	11.88	0.58	0.446317	-1.99656	-0.00199918	4.80248	5.81893	5.62817	0	1.01241e+08	7.18018e+08	10.97	0	0.0429	3.93665
-8.11311	157.174	Central Indo-Pacific	2016-03-23	30	0	1.74	13.55	0.58	0.446317	-1.99656	-0.00199918	4.53542	5.37325	5.54731	0	1.06105e+08	7.16516e+08	353.72	0	0.0435	3.93665
-7.88505	157.151	Central Indo-Pacific	2016-03-18	75	2.82	1.89	14.31	0.94	0.484856	-2.02611	0.0101655	4.53542	5.37325	5.54731	0	1.15367e+08	5.98784e+08	81.07	0	0.0391	3.93665
-7.86354	157.128	Central Indo-Pacific	2016-03-18	30	1.09	1.91	16	0.91	0.488908	-2.03295	0.0103211	4.35648	4.98554	4.90897	0	1.12263e+08	5.97223e+08	97.6	0	0.0399	3.93665
5.33197	163.039	Central Indo-Pacific	2004-08-03	5	0	1.48	10.46	0.52	2.35646	0.061881	0.562447	5.78327	5.65752	5.94596	0	0	2.92779e+09	623.21	2	0.025	3.89076
-7.84359	157.097	Central Indo-Pacific	2016-03-17	75	0.5275	1.6725	15.2025	0.79	0.492886	-2.04037	0.0089138	4.63379	5.39873	5.19161	0	1.1041e+08	5.98785e+08	213.84	0	0.0384678	3.93665
17.1515	-88.0466	Tropical Atlantic	2006-07-21	5	0	1.5	12.51	0.57	1.2908	0.684649	0.113181	6.42345	5.99541	5.86509	0	5.08185e+08	1.82298e+10	6078.93	2	0.137561	3.74429
-14.255	-170.63	Eastern Indo-Pacific	2001-03-15	5	0.19	1.38	11.99	0.518571	0.0778036	-1.87675	0.0319663	6.18284	6.56954	6.53424	0	0	4.4807e+09	135.78	0	0.0266	4.08905
19.0242	-68.8889	Tropical Atlantic	2009-12-13	5	1.06	1.26	12.48	0.33	1.1273	1.00523	0.735304	6.41401	6.87703	6.81091	5.62587e+07	5.62587e+07	1.61449e+10	1489.97	2	0.0665	3.99996
7.35736	116.972	Central Indo-Pacific	2017-05-06	5	0	1.27	7.79	0.56	1.83515	0.15015	-0.296308	5.27306	5.2175	5.43206	1.15973e+07	1.15973e+07	1.63684e+09	2605.91	0	0.102953	3.7615
18.8931	-87.6267	Tropical Atlantic	1999-09-22	5	5.56333	0.996667	7.52	0.353333	1.3428	0.791185	0.416668	5.47271	5.47271	7.00246	0	6.66381e+08	2.06539e+10	931.92	2	0.0384	3.76935
18.44	-77.1603	Tropical Atlantic	2012-07-12	5	0	0.9825	7.52	0.2625	1.55175	0.70684	0.407655	7.11645	6.69924	6.70469	0	4.15385e+07	8.30223e+09	990.4	2	0.0289	3.90605
17.6308	-63.215	Tropical Atlantic	1999-12-15	5	0	0.98	9.42	0.25	1.24256	0.898639	0.617389	7.14874	7.02864	7.1627	1.38653e+10	1.38653e+10	3.71212e+10	137.57	2	0.030371	4.01832
13.7886	42.8063	Western Indo-Pacific	2008-07-19	5	0	2.11	13.86	0.93	1.01848	0.933974	-1.20324	6.62567	7.23119	7.25188	0	0	1.79803e+07	1691.85	0	0.147876	3.62087
26.5947	-78.3833	Tropical Atlantic	2013-04-24	5	0	0.56	4.1425	0.155	0.192615	1.70735	-0.208252	6.86331	6.28354	5.9769	1.72059e+09	1.75794e+09	4.55e+10	827.25	0	0.0472	3.90823
24.8355	-80.6377	Tropical Atlantic	2003-07-29	5	0	0.9	7.11	0.27	0.0386382	1.7551	-0.536293	5.79702	6.13257	6.55015	0	2.4525e+06	1.19797e+10	6055.31	2	0.148915	3.90301
18.3647	-69.0242	Tropical Atlantic	2004-10-24	30	1.07	0.75	5.1	0.24	1.34443	0.82419	0.5944	7.10255	7.17432	7.01613	2.99876e+09	3.09757e+09	1.50427e+10	367.57	0	0.0345	3.98121
19.8417	-87.4375	Tropical Atlantic	1999-08-20	5	1.18	0.76	5.44	0.25	1.24315	0.817921	0.271152	6.21126	6.29505	6.61305	0	2.023e+08	1.82902e+10	979.87	2	0.0495	3.79592
19.1542	-87.5333	Tropical Atlantic	1999-10-02	5	5.21333	1.01	7.02333	0.33	1.31925	0.80563	0.406104	5.80977	5.80977	6.84873	0	5.99443e+08	1.71911e+10	784.15	2	0.0326	3.76935
19.2862	-81.3911	Tropical Atlantic	1999-06-15	5	0	0.74	5.89	0.19	1.41714	0.78089	0.200121	6.92797	7.00365	6.68396	0	6.33349e+08	1.54998e+10	17.58	2	0.0287	3.87473
18.2696	-76.6898	Tropical Atlantic	2000-08-10	5	0	0.97	7.32	0.23	1.52903	0.720932	0.462428	7.67981	7.53736	7.30399	0	2.03603e+08	9.80513e+09	326.86	2	0.0357	3.90605
28.8158	48.7739	Western Indo-Pacific	2006-09-01	5	0	2.6	21.73	0.77	-2.58521	4.23411	-2.15679	3.09647	4.30222	4.1873	0	0	0	214.66	1	0.122415	3.62208
-17.5827	178.848	Central Indo-Pacific	2011-04-18	5	0	1.39	12.54	0.5	-1.06924	-0.956488	0.114229	5.75439	6.37473	6.61485	1.03719e+07	1.03719e+07	1.27653e+10	5872.71	0	0.0457	3.98144
-22.1254	43.1976	Western Indo-Pacific	2006-06-06	5	0	1.08	7.59	0.36	-1.29658	-0.575491	-0.278612	6.64493	6.73331	6.87466	2.98237e+07	2.98237e+07	1.22952e+10	2986.46	0	0.0746	3.71653
12.256	109.205	Central Indo-Pacific	2010-05-15	5	8.78	2.46	13.03	1.28	0.679818	0.829523	-0.349037	6.23585	6.9676	7.24868	8.71404e+06	3.72805e+08	1.49638e+10	734.1	0	0.0965	3.6762
19.7704	-70.5183	Tropical Atlantic	2006-08-28	75	0	0.79	5.8	0.24	1.12394	1.01058	0.80425	7.94833	7.73674	7.39191	4.67212e+07	1.03071e+08	1.2544e+10	128.53	2	0.0615	3.99858
12.8699	-61.1946	Tropical Atlantic	2005-11-12	75	3.96	1.11	9.23	0.37	1.34568	0.817644	0.908772	6.112	6.43353	7.17709	3.66261e+08	3.66261e+08	8.54671e+09	75.12	0	0.0501	3.91063
16.802	-87.86	Tropical Atlantic	2005-11-15	5	5.2	1.52	9.21	0.67	1.38115	0.672409	0.252976	5.41567	5.54703	5.69927	3.66596e+08	3.66596e+08	1.54941e+10	8489.72	0	0.115931	3.74429
21.8625	-81.33	Tropical Atlantic	2001-03-16	5	0	1.02	7.67	0.31	0.999856	1.03974	-0.389301	6.8051	5.96893	6.05891	4.16447e+07	4.16447e+07	1.56263e+10	17430.2	2	0.0638	3.90672
21.7384	-81.0962	Tropical Atlantic	2001-03-15	5	0	0.88	7.13	0.24	1.12277	0.998645	-0.222954	6.70509	5.94583	6.00907	4.35275e+07	4.35275e+07	1.33493e+10	27625.5	2	0.0868	3.90672
18.02	-76.2688	Tropical Atlantic	2008-08-15	5	0	1.24	11.75	0.33	1.52465	0.713706	0.518843	7.40977	7.63012	7.50781	0	1.38948e+09	1.10965e+10	308.24	1	0.0413	3.91706
10.01	125.01	Central Indo-Pacific	2008-01-15	30	0	1.85	14.77	0.73	1.66954	0.365793	-0.0267679	5.85458	5.52776	5.49229	1.15716e+08	1.15716e+08	1.59185e+10	880.09	0	0.0513578	3.79033
11.3413	123.752	Central Indo-Pacific	2008-05-04	5	0	2.42	19.46	1.02	1.48321	0.413625	-0.321269	5.11759	4.37295	4.55398	4.6826e+07	4.6826e+07	3.00869e+10	5149.25	0	0.0813	3.77904
11.5744	92.594	Western Indo-Pacific	2016-05-18	75	1.02	1.3	10.25	0.43	0.943218	-1.5296	-0.772904	4.82269	5.7771	6.10754	0	0	4.01341e+09	91.45	0	0.0784	3.65219
4.25044	118.627	Central Indo-Pacific	2015-12-07	5	0	1.07	8.3	0.44	1.9493	-0.369075	-0.173189	3.83555	4.17661	4.10442	0	4.57289e+06	8.12066e+07	178.3	0	0.0866	3.78864
4.02583	72.8057	Western Indo-Pacific	2011-09-14	5	1.38	1.07	10	0.3	1.14015	-1.51993	-0.783898	4.68502	4.86435	4.96686	0	0	8.52927e+07	588.01	0	0.0832	3.88709
0.0433333	119.873	Central Indo-Pacific	2007-07-17	5	0	1.94667	13.3567	0.823333	2.30933	-0.462037	0.0142119	4.30499	4.33128	4.07917	0	0	0	277.61	0	0.0467	3.80609
24.1774	-76.4331	Tropical Atlantic	2012-08-17	5	0	0.76	5.3	0.23	0.379666	1.56993	-0.137806	5.93276	6.06807	5.91768	0	2.04305e+09	1.61333e+10	488.07	2	0.0376	3.96672
8.71589	-83.8695	Tropical Eastern Pacific	2009-02-06	30	0	0.85	8.07	0.24	0.566387	-1.89523	-0.651448	3.98814	3.81362	3.76382	0	2.79153e+07	2.38489e+08	124.45	2	0.064	3.55234
24.6621	-82.7778	Tropical Atlantic	2012-09-11	30	0	0.85	9.02	0.2	-0.318355	2.09722	-0.566336	5.11123	6.25614	5.94572	6.65759e+08	6.67997e+08	1.97217e+10	9498	2	0.0564	3.87219
26.3535	-76.978	Tropical Atlantic	1999-08-15	5	0	0.45	4.09	0.1	0.0748533	1.82817	-0.0334035	5.42142	6.01065	6.19215	0	3.2696e+08	3.51856e+10	476.48	2	0.0404	3.93717
20.505	-86.758	Tropical Atlantic	2005-12-15	5	0.21	0.772	6.492	0.226	1.34397	0.805099	0.394297	6.9413	6.97525	6.82184	1.475e+10	1.48817e+10	2.76781e+10	643.84	2	0.0281	3.80288
22.633	-78.646	Tropical Atlantic	2005-10-15	75	5.85	1.12	8.73	0.4	0.620491	1.28543	-0.171849	6.30169	6.76245	6.16773	4.96969e+08	4.96969e+08	1.58019e+10	632.31	2	0.0418	3.9363
-17.916	177.2	Central Indo-Pacific	2000-04-15	30	0	0.88	6.67	0.29	-0.7461	-1.16496	-0.00720172	5.76084	6.91984	7.20244	2.31488e+08	2.31488e+08	1.59506e+10	6218.58	2	0.052	3.96798
20.2586	-87.3854	Tropical Atlantic	2009-09-08	5	3.4975	1.19	9.8975	0.365	1.31692	0.813202	0.414627	6.00027	6.966	6.92304	0	0	1.98334e+10	917.71	2	0.0301	3.79592
19.6879	-79.8941	Tropical Atlantic	2000-06-15	5	0	0.85	6.27	0.28	1.35339	0.829137	0.0752341	6.487	6.66559	6.4879	0	1.72711e+08	1.17357e+10	235.34	1	0.0276	3.90209
9.153	-82.075	Tropical Atlantic	2005-11-15	75	9.316	3.322	21.614	1.738	1.80442	0.249503	0.480816	4.37349	4.64397	4.1096	1.22577e+07	1.22577e+07	5.38408e+08	1619.24	0	0.150854	3.5707
20.587	-78.4653	Tropical Atlantic	2001-08-15	5	0	1.1	6.17	0.42	1.15388	0.914017	-0.292081	5.23779	5.85265	5.69484	0	8.91153e+07	9.04138e+09	1458.51	2	0.148487	3.93838
24.3505	-76.5892	Tropical Atlantic	2008-07-27	5	0	0.69	5.21	0.2	0.32708	1.60186	-0.22645	6.00051	5.9714	5.91768	0	6.59022e+08	1.6243e+10	372.81	0	0.0374	3.95698
24.1746	-76.4336	Tropical Atlantic	2008-07-26	30	0	0.76	5.3	0.23	0.379666	1.56993	-0.137806	6.00051	5.9714	5.91768	0	5.78981e+08	1.61173e+10	393.52	0	0.0376	3.96672
23.6334	-75.3524	Tropical Atlantic	2008-07-25	5	0	0.7	5.88	0.26	0.544442	1.48055	0.144427	6.35701	6.37992	6.23149	0	3.20616e+08	2.24889e+10	963.86	0	0.0362	3.97575
-7.94788	157.186	Central Indo-Pacific	2016-03-21	30	1.03	1.91	17.76	0.74	0.478616	-2.01859	0.0119996	4.53542	5.37325	5.54731	0	1.15843e+08	6.22875e+08	26.38	0	0.0405	3.93665
-7.91001	157.172	Central Indo-Pacific	2016-03-18	30	2.82	1.89	14.31	0.94	0.478616	-2.01859	0.0119996	4.53542	5.37325	5.54731	0	1.16209e+08	6.00096e+08	94.24	0	0.0417	3.93665
32.347	-64.928	Tropical Atlantic	2005-10-15	5	1.01	0.48	3.86	0.11	-1.79562	3.23779	0.525917	5.87863	7.23577	7.30884	6.26242e+08	6.26242e+08	2.44999e+10	6233.71	0	0.0722	3.78605
-24.1114	152.711	Temperate Australasia	2013-02-02	5	0	1.05	7.64	0.33	-2.47642	0.204215	0.503	7.11062	7.62017	7.40946	0	0	2.08147e+09	182.28	0	0.0503	3.64227
-21.9555	43.2091	Western Indo-Pacific	2003-08-15	75	0	1.12	7.56	0.41	-1.2739	-0.590348	-0.290054	7.21363	7.02025	6.74393	1.71577e+08	3.5378e+08	1.13637e+10	164	0	0.0976	3.71653
-21.1217	43.1933	Western Indo-Pacific	2003-08-26	5	0	1.03	10.7	0.31	-1.08312	-0.767023	-0.370358	6.66027	6.52098	6.25929	3.29217e+07	3.22869e+08	1.22889e+10	38456.2	2	0.0393	3.73006
18.331	-65.333	Tropical Atlantic	2005-09-15	75	2.08	0.57	5.35	0.12	1.19841	0.939056	0.603076	6.02179	6.59478	7.02479	0	1.63443e+09	2.81297e+10	77.33	0	0.0503	4.00777
15.959	-61.322	Tropical Atlantic	2011-12-20	5	0	0.66	5.22	0.2	1.28456	0.869055	0.818817	6.31552	6.68649	7.05564	1.3529e+09	1.3529e+09	1.83088e+10	345.63	0	0.0305	3.98686
16.7622	-62.2242	Tropical Atlantic	2005-01-14	5	0	1.08	10.88	0.31	1.27321	0.873709	0.704795	6.674	7.1707	7.0525	7.28496e+08	7.28496e+08	2.42917e+10	39.42	0	0.0289325	4.00358
11.219	-74.241	Tropical Atlantic	2005-12-15	5	0	1.44	9.09	0.44	1.18485	0.929558	0.540651	7.50645	8.37586	7.70744	1.41309e+06	1.41309e+06	9.63676e+08	77.41	0	0.101142	3.73012
21.751	-82.007	Tropical Atlantic	2005-07-15	5	0	1.39	12.67	0.52	0.772196	1.08261	-0.647759	5.79652	6.1398	5.94463	2.69901e+08	2.92458e+09	1.69298e+10	6454.99	0	0.183925	3.89238
17.3	-87.5	Tropical Atlantic	1998-09-15	75	1	1.21	9.59	0.42	1.40013	0.736236	0.422501	5.68517	6.00732	6.46531	0	0	2.2853e+10	11125.7	2	0.0334	3.74429
15.98	-86.4675	Tropical Atlantic	2006-12-11	5	2.56	1.68	10.65	0.62	1.50606	0.621846	0.381177	4.65571	4.57487	4.80897	0	0	1.67505e+10	226.38	0	0.0602	3.75279
16.0897	-88.299	Tropical Atlantic	2005-08-04	5	5.54	1.81	13.04	0.83	1.34864	0.528636	-0.0644518	5.71066	5.86465	4.8943	1.34846e+07	1.34846e+07	1.00944e+10	2815.76	0	0.0978	3.72694
16.2071	-88.5104	Tropical Atlantic	2004-08-12	5	0	1.97	13.21	0.94	1.35628	0.509876	-0.0819602	5.41353	4.87442	4.4552	0	0	1.03512e+10	230.14	0	0.0995	3.71382
9.397	-79.832	Tropical Atlantic	2005-08-15	30	0	1.8925	16.185	0.6425	1.69162	0.472565	0.600854	4.75548	5.51098	5.26979	0	0	6.34446e+08	158.03	2	0.0752	3.59
9.405	-79.86	Tropical Atlantic	2005-08-15	30	0	1.8925	16.185	0.6425	1.69472	0.471354	0.60607	4.75548	5.51098	5.26979	0	0	6.40174e+08	264.34	2	0.0826	3.59
-8.7495	115.895	Central Indo-Pacific	2020-02-26	5					-0.0576854	-1.76043	0.156224	4.59524	5.5072	5.87037	0	0	4.42553e+08	128.78	0	0	3.78259
-8.30417	116.137	Central Indo-Pacific	2014-10-29	5	0	1.41	10.55	0.67	0.232914	-1.97915	0.136785	5.34543	4.98472	5.4268	0	2.93792e+07	2.25759e+08	4772.18	2	0.0441	3.78506
9.822	-75.891	Tropical Atlantic	2005-08-15	30	2.21	1.47	14.4	0.64	1.95956	0.293244	0.201304	4.56652	5.36414	5.15882	0	0	5.17736e+08	4569.6	1	0.0954	3.67094
10.2649	124.195	Central Indo-Pacific	2004-07-13	5	0	2.67	18.2	1.24	1.78109	0.255997	-0.206258	2.05224	2.0452	2.11837	3.89895e+08	6.47016e+08	1.60246e+10	2964.58	0	0.187276	3.78374
11.1286	72.7346	Western Indo-Pacific	2016-05-06	75	4	0.74	6.35	0.22	0.494873	-2.05527	-0.596501	3.82783	4.83557	5.13507	0	3.81695e+07	3.89129e+09	238.38	2	0.0488	3.79912
6.70228	116.364	Central Indo-Pacific	2012-10-26	5	0	1.09	7.32	0.34	1.64725	0.398694	-0.443485	5.13374	5.60331	5.51051	0	3.69193e+07	1.40288e+09	408.94	0	0.0844	3.75683
10.9172	72.2992	Western Indo-Pacific	2016-05-03	75	1.15	0.64	4.55	0.18	0.516593	-2.05704	-0.60579	3.90278	4.86253	5.28145	0	4.0142e+07	3.25332e+09	2279.91	2	0.0768167	3.7998
4.10433	73.4265	Western Indo-Pacific	2011-09-05	5	0	1.06	8.15	0.35	1.02411	-1.64326	-0.804566	4.75914	4.93983	5.07318	0	0	1.12047e+08	2060.25	0	0.0886	3.88709
4.14092	118.18	Central Indo-Pacific	2013-11-06	5	0	0.97	6.15	0.42	2.01037	-0.661979	-0.292569	3.54086	3.95952	4.15338	0	1.68219e+06	7.80472e+07	16812.9	0	0.0892	3.78461
-8.04992	157.196	Central Indo-Pacific	2016-03-22	30	1.24	1.5	10.53	0.61	0.460427	-2.00632	0.00480255	4.53542	5.37325	5.54731	0	1.10362e+08	6.85856e+08	36.08	0	0.0436	3.93665
21.2994	-79.585	Tropical Atlantic	2001-08-15	5	0	0.76	6.18	0.27	1.01002	1.04686	-0.284219	5.20909	5.90453	5.80358	0	5.18994e+07	9.36052e+09	23836.1	2	0.143701	3.91317
9.5753	-78.6761	Tropical Atlantic	2002-06-15	5	0	1.6	15.28	0.51	1.6612	0.486419	0.476934	7.13454	6.36789	5.89019	0	0	7.00464e+08	424.8	0	0.0595	3.64022
32.337	-64.672	Tropical Atlantic	2005-08-15	5	0	0.56	3.59	0.14	-1.79937	3.23968	0.515319	6.47722	7.17465	7.27545	5.33356e+08	8.72481e+08	2.03315e+10	134.93	2	0.0436	3.78605
24.5677	-81.3845	Tropical Atlantic	2011-08-23	5	1.86	0.86	5.63	0.28	-0.0190355	1.8081	-0.565864	5.72111	6.44597	6.47955	1.16428e+07	4.87334e+08	1.68775e+10	6028	2	0.121001	3.90301
12.2583	-68.4275	Tropical Atlantic	1999-02-04	30	0	0.7	4.9	0.22	1.2007	0.902053	1.03955	6.85061	7.2557	7.96923	0	0	3.02435e+09	722.38	0	0.0373	3.82443
17.1384	-87.5989	Tropical Atlantic	1999-10-06	5	2.23	1.16	9.67	0.46	1.4044	0.719774	0.396366	5.95943	6.43156	6.46531	722873	1.79628e+09	2.03225e+10	5891.34	2	0.079	3.74429
18.1964	-78.1046	Tropical Atlantic	2015-05-12	5	0	0.7	4.1	0.22	1.68782	0.598038	0.348233	6.22298	6.0587	6.14652	0	0	1.20926e+10	2026.46	2	0.041	3.89472
-4.58806	145.894	Central Indo-Pacific	2008-09-23	5	0	2.4425	16.1275	1.2125	0.43624	-2.07978	0.40381	5.82642	5.72904	4.63003	0	0	0	408.95	1	0.0434	3.90873
7.20878	117.469	Central Indo-Pacific	2017-05-03	5	0	1.31	8.65	0.68	1.89235	0.0681804	-0.264359	5.05378	4.74281	4.99008	1.1337e+07	1.1337e+07	1.34038e+09	13928.1	2	0.056	3.7615
27.1038	-80.1209	Tropical Atlantic	2006-09-22	5	1.3975	0.825	5.315	0.27	-0.00289186	1.82751	-0.14675	5.13453	6.31459	6.26398	1.74592e+08	2.31961e+09	2.37291e+10	1182.39	2	0.119275	3.88532
25.3138	-78.0829	Tropical Atlantic	2013-09-09	5	0	0.95	7.27	0.31	0.132786	1.71131	-0.347411	5.45862	5.68102	5.26726	1.30268e+08	1.12587e+09	1.75535e+10	4394.61	1	0.051	3.93984
18.5241	-77.8795	Tropical Atlantic	2000-08-15	5	0	1.02	7.25	0.27	1.60865	0.656327	0.317056	6.29187	6.5413	6.20184	0	1.98432e+08	8.62629e+09	322.78	2	0.038	3.91264
18.4686	-78.1225	Tropical Atlantic	2000-08-15	5	0	1.41	11.38	0.43	1.63348	0.63471	0.283263	6.29187	6.5413	6.20184	0	2.19475e+08	9.64717e+09	1026.44	2	0.0292938	3.89472
-8.18631	125.638	Central Indo-Pacific	2004-11-15	5	0	1.62	11.5	0.75	0.318569	-1.66877	0.472562	5.43528	5.391	4.45862	0	0	5.44748e+08	478.73	0	0.0489	3.82408
26.5614	-76.9495	Tropical Atlantic	1999-08-16	5	0	0.7	5.59	0.18	0.0638665	1.83128	-0.0254775	5.42698	5.95439	6.31016	0	3.72248e+08	3.55901e+10	1156.5	2	0.0401811	3.91771
-14.6634	145.691	Central Indo-Pacific	2003-04-06	5	0	1.35	10.3	0.41	-1.22789	-0.548597	0.217193	7.48582	7.91553	7.87422	0	0	1.35807e+10	48230.7	2	0.0393	3.86181
-18.1338	179.323	Central Indo-Pacific	2002-02-15	5	1.03	0.86	7.22	0.31	-1.08084	-0.974801	0.0982094	6.55377	6.82765	6.84741	0	6.93056e+07	9.29996e+09	2144.45	0	0.0375	3.98144
11.325	-60.616	Tropical Atlantic	2005-11-15	75	6.22	1.2325	9.18	0.445	1.33066	0.83212	0.853454	5.86438	6.33455	6.97044	1.31304e+09	1.31304e+09	5.9921e+09	545.92	2	0.0643	3.84926
26.4969	54.0476	Western Indo-Pacific	2004-08-14	5	0	1.45	14	0.41	-0.49694	2.63574	-2.06523	3.90473	4.23783	4.04428	0	0	634040	940.91	1	0.167193	3.63395
-13.0028	48.4976	Western Indo-Pacific	2016-04-14	75	2.86	1.19	9.39	0.47	-0.530552	-1.38726	-0.331818	4.81466	4.91414	4.39776	0	0	7.00945e+09	24.2	0	0.0608	3.77624
22.2583	-81.1812	Tropical Atlantic	2004-06-21	5	0	5.8	40.44	2.48	1.04005	1.0727	-0.29598	5.53346	5.45058	5.41046	0	0	1.61613e+10	1414.07	0	0.0588	3.90672
-4.35	55.65	Western Indo-Pacific	1998-02-15	75	1.06	0.69	5.53	0.21	-0.321957	-1.52495	-0.0927158	5.56152	5.87615	5.67899	0	0	3.25861e+08	117.05	1	0.0434	3.80988
20.587	-78.4653	Tropical Atlantic	2001-08-15	5	0	1.1	6.17	0.42	1.15388	0.914017	-0.292081	5.23779	5.85265	5.69484	0	8.91173e+07	9.04134e+09	1474.51	2	0.148487	3.93838
25.6035	56.3487	Western Indo-Pacific	2007-03-08	5	0	1.58	10.54	0.61	-0.0992504	2.08263	-2.04456	4.34403	3.93276	3.89359	0	0	2.29344e+08	515.17	0	0.18734	3.63147
-14.9756	-147.636	Eastern Indo-Pacific	2013-06-21	5	1.53	1.06	7.93	0.41	-0.10353	-1.77664	-0.198647	6.47913	6.73112	6.50367	0	0	4.86871e+08	434.07	0	0.0424	4.10027
-14.173	-169.634	Eastern Indo-Pacific	2002-03-15	30	1.32	1.24	7.69	0.49	0.105172	-1.89339	0.0404433	6.07417	6.44981	6.56981	0	0	7.59891e+09	370.6	2	0.024534	4.09397
8.71711	-83.8739	Tropical Eastern Pacific	2009-02-04	5	0	0.85	8.07	0.24	0.566387	-1.89523	-0.651448	3.98814	3.81362	3.76382	0	2.79877e+07	2.38534e+08	393.43	2	0.064	3.55234
-8.13675	125.642	Central Indo-Pacific	2004-11-23	5	0	1.61	9.86	0.71	0.331654	-1.67774	0.476863	5.43528	5.391	4.45862	0	0	5.24945e+08	446.41	0	0.045	3.82408
11.214	72.7798	Western Indo-Pacific	2016-05-07	75	3.28	0.68	4.69	0.18	0.48979	-2.05294	-0.591257	3.82783	4.83557	5.13507	0	3.96255e+07	4.01272e+09	395.35	2	0.0429	3.79912
11.2072	72.7497	Western Indo-Pacific	2016-05-08	75	3.28	0.68	4.69	0.18	0.497274	-2.05142	-0.595516	3.82783	4.83557	5.13507	0	4.02154e+07	4.02785e+09	1928.24	0	0.053	3.79912
11.1332	72.7195	Western Indo-Pacific	2016-05-06	75	4	0.74	6.35	0.22	0.494873	-2.05527	-0.596501	3.82783	4.83557	5.13507	0	3.86722e+07	3.90982e+09	401.02	2	0.0488	3.79912
10.1448	73.6656	Western Indo-Pacific	2016-05-11	75	3.87	0.64	4.18	0.2	0.455251	-2.04164	-0.611706	3.72847	4.62415	4.96709	0	1.09844e+07	2.63742e+09	181.15	2	0.0815	3.82303
10.073	73.6495	Western Indo-Pacific	2016-05-13	75	4.7	0.74	4.69	0.21	0.462068	-2.04305	-0.615756	3.72797	4.64082	4.96565	0	1.06692e+07	2.58671e+09	156.77	2	0.0388	3.82303
5.96778	116.013	Central Indo-Pacific	2015-11-23	5	0	1.3	9.15	0.48	1.88698	0.147955	-0.395106	4.21238	4.85648	4.34107	0	2.74418e+06	1.19305e+09	60.3	0	0.100016	3.76403
5.71694	115.635	Central Indo-Pacific	2015-08-25	5	0	1.31	12.79	0.49	1.92081	0.0977828	-0.371116	3.93612	4.69362	4.24864	0	1.67766e+06	1.15797e+09	906.03	0	0.156829	3.76403
19.9157	-71.5991	Tropical Atlantic	2004-08-15	5	0	0.84	5.92	0.24	1.23603	0.940096	0.660468	9.13028	8.27526	7.49162	2.62458e+06	1.46054e+08	1.05368e+10	1294.43	2	0.226577	3.98997
21.6766	-158.045	Eastern Indo-Pacific	2009-06-28	30	0	1.24	9.13	0.31	0.199423	1.6335	1.32377	7.26854	7.07381	7.34609	0	0	1.59767e+09	503.17	2	0.0319	3.74756
23.8467	-75.1233	Tropical Atlantic	2008-07-24	5	0	0.77	6.81	0.19	0.632215	1.43029	0.282823	6.49942	6.54011	6.3995	0	2.48936e+08	2.36302e+10	416.51	0	0.0442	3.97575
9.576	-78.8732	Tropical Atlantic	2002-06-15	5	0	1.78	14.89	0.64	1.65067	0.496884	0.4776	7.13454	6.36789	5.89019	0	0	7.10454e+08	900.7	0	0.0987	3.64022
12.4661	43.3854	Western Indo-Pacific	2005-03-17	5	0	2	14.7	0.94	1.1963	0.650307	-0.974041	5.93819	5.42551	5.76604	0	0	8.32131e+07	51.17	0	0.100464	3.64899
-17.25	178.566	Central Indo-Pacific	2000-04-15	75	1.61	0.83	7.4	0.29	-1.01267	-0.997216	0.105729	5.4255	6.337	6.79823	8.37171e+07	8.37171e+07	1.39209e+10	12821.7	0	0.0527	4.00191
11.335	-74.076	Tropical Atlantic	2010-09-15	75	8.13	1.87	12.86	0.65	1.02788	1.03736	0.66377	7.15832	8.33922	8.94396	0	0	1.01309e+09	506.31	2	0.0881	3.73012
17.507	-88.0474	Tropical Atlantic	2005-09-21	30	8.76	1.16	8.84	0.45	1.27852	0.675004	0.0999432	5.25072	5.69231	6.14991	3.7507e+07	3.7507e+07	2.10851e+10	2079.81	2	0.0545	3.75838
12.3091	-82.9878	Tropical Atlantic	2003-06-15	5	0	1.85	15.01	0.61	1.68234	0.488411	0.721242	5.88271	6.10078	6.17331	0	0	5.10064e+09	874.29	0	0.0472	3.67476
20.0357	145.225	Central Indo-Pacific	2001-08-15	30	0	1.26	13.03	0.37	1.2485	0.872306	-0.0187714	5.83795	6.61329	6.63362	1.40731e+09	1.50354e+09	4.05445e+10	197.95	2	0.023	3.85871
3	73.5	Western Indo-Pacific	1998-05-15	75	5.8	1.16	8.99	0.4	1.03292	-1.67905	-0.791169	4.36058	4.158	4.90913	0	0	2.89207e+07	10487.8	0	0.0575	3.88387
2.89342	73.4032	Western Indo-Pacific	2019-09-10	30	0	1.18	9.57	0.38	1.05913	-1.65572	-0.794834	4.34159	4.38573	4.90913	0	0	2.63009e+07	2501.5	0	0.0656	3.88546
5.0167	72.9167	Western Indo-Pacific	1998-05-15	75	5.14	1.09	7.34	0.37	0.980631	-1.69385	-0.804231	4.37655	4.38642	5.0141	0	0	2.14896e+08	896.31	0	0.0596	3.88657
13.2153	120.528	Central Indo-Pacific	2016-06-12	5	0	0.755	4.8725	0.215	1.85247	-0.332105	-0.454774	3.97988	4.71215	4.92186	7.64414e+08	8.24068e+08	2.65416e+10	924.24	2	0.0368916	3.74624
12.6664	120.413	Central Indo-Pacific	2005-12-02	30	0	2.03	14.49	0.9	1.95856	-0.288531	-0.366932	5.53903	4.69266	4.09551	7.04495e+06	3.38115e+08	2.47683e+10	320.2	0	0.044	3.73889
12.6677	120.41	Central Indo-Pacific	2005-12-01	5	0	2.03	14.49	0.9	1.95856	-0.288531	-0.366932	5.53903	4.69266	4.09551	7.05083e+06	3.37729e+08	2.47756e+10	668.97	2	0.0419	3.73889
25.8371	-80.1055	Tropical Atlantic	2014-09-19	30	2.13	0.56	4.16	0.18	0.205511	1.62824	-0.36555	4.94119	5.93635	6.1188	6.66252e+07	6.66252e+07	1.49034e+10	1367	2	0.0684	3.90491
32.481	-64.699	Tropical Atlantic	2005-07-15	5	0	0.48	4.11	0.1	-1.8296	3.25932	0.536484	7.35088	7.319	7.36356	0	3.48637e+08	2.37061e+10	10247.6	2	0.0541	3.78605
24.4587	-82.2061	Tropical Atlantic	2007-10-11	30	1.73	0.88	7.88	0.26	-0.120438	1.92425	-0.519671	5.39429	6.47545	6.19421	4.42237e+07	4.42237e+07	1.7572e+10	10967	2	0.0856	3.89426
21.1706	-86.7298	Tropical Atlantic	2009-09-10	5	1.12	0.67	5.17	0.2	1.18799	0.882779	0.397274	5.78507	6.94354	6.72991	0	1.767e+07	2.09367e+10	3834.72	1	0.062	3.80288
20.1	-87.464	Tropical Atlantic	2005-06-15	30	0	2.6	31.6	0.83	1.28904	0.810207	0.355451	7.13216	6.80266	6.89213	6.53919e+07	5.81959e+08	1.94484e+10	984.12	2	0.0366	3.79592
24.3126	123.916	Central Indo-Pacific	2008-11-23	5	0	0.9	7.01	0.28	-0.122239	1.85023	-0.308499	7.24024	7.71649	7.67109	3.70254e+09	3.70254e+09	8.93726e+10	774.16	0	0.10565	3.62713
-14.9302	145.675	Central Indo-Pacific	2004-03-03	5	1.06	1.21	7.71	0.48	-1.2758	-0.48907	0.221821	6.51081	7.52259	7.81901	1.14498e+07	1.14498e+07	1.16822e+10	35161.9	0	0.0949	3.86181
11.888	-64.65	Tropical Atlantic	2005-08-15	5	0	1.31	15.01	0.36	0.922836	1.11577	1.08501	6.13055	6.06875	6.67865	9.62896e+07	2.33366e+09	4.47206e+09	2819.54	0	0.0675	3.8506
22.4875	-73.1333	Tropical Atlantic	2004-03-22	5	0	0.77	6.02	0.19	0.90367	1.1978	0.390838	6.87108	6.90356	6.75018	4.80477e+07	4.80477e+07	2.20591e+10	3521.84	2	0.0272	3.99648
19.34	-69.48	Tropical Atlantic	2005-10-15	30	6.59	0.89	6.59	0.26	1.1415	0.991695	0.776501	7.19326	7.22463	6.75426	1.0797e+07	1.0797e+07	1.51154e+10	1736.32	2	0.0413039	3.99996
19.7605	-70.5206	Tropical Atlantic	2006-08-28	75	0	0.79	5.8	0.24	1.12394	1.01058	0.80425	7.94833	7.73674	7.39191	4.62993e+07	1.02692e+08	1.24798e+10	95.45	2	0.0615	3.99858
-17.5698	177.082	Central Indo-Pacific	2004-12-03	5	0	0.9	6.8	0.3	-0.67243	-1.20095	-0.0406564	7.68253	7.35539	6.67859	0	8.71554e+07	1.83748e+10	867.01	0	0.04	3.96798
-12.7473	48.6708	Western Indo-Pacific	2016-04-13	75	5.65	1.35	9.02	0.54	-0.636464	-1.29197	-0.28413	5.04629	5.27464	4.67568	0	0	6.86492e+09	100.82	0	0.0794	3.77472
15.285	-62.274	Tropical Atlantic	2005-11-15	75	8.34	0.79	8.34	0.16	1.35921	0.823876	0.766702	6.13359	6.35967	6.93369	3.23393e+07	3.23393e+07	1.43902e+10	91552.8	2	0.0365	3.95796
26.2431	55.1565	Western Indo-Pacific	2017-02-11	5	0	1.21	11.63	0.34	-0.359273	2.45079	-1.89769	4.23878	3.99316	4.11197	0	0	7.40535e+07	201.19	1	0.212014	3.63286
20.832	-86.874	Tropical Atlantic	2005-09-15	5	4.57667	0.843333	6.61667	0.23	1.31124	0.818724	0.405039	6.1693	6.85195	6.71562	3.29636e+08	3.29636e+08	2.58109e+10	1260.64	2	0.0305	3.80288
18.517	-67.098	Tropical Atlantic	2005-11-15	30	7.29	0.91	9.86	0.24	1.32506	0.851195	0.536612	6.68446	6.77551	6.86376	1.48969e+07	1.48969e+07	2.0024e+10	192.39	2	0.043	4.01381
21.2994	-79.585	Tropical Atlantic	2001-08-15	5	0	0.76	6.18	0.27	1.01002	1.04686	-0.284219	5.20909	5.90453	5.80358	0	4.53092e+07	9.36042e+09	16829.1	2	0.143701	3.91317
15.9542	-86.5178	Tropical Atlantic	2003-08-10	5	0	1.7	9.1	0.65	1.50511	0.617723	0.368483	4.61012	4.42381	4.80897	285255	2.50831e+06	1.58627e+10	1137.39	0	0.0787	3.74002
13.6592	122.792	Central Indo-Pacific	2014-10-26	5	1	2.24	20.9	0.8	1.26995	0.365335	-0.569598	3.51582	3.73337	3.93678	2.21241e+09	2.30992e+09	4.4768e+10	89.87	0	0.0683	3.75522
-8.50936	116.857	Central Indo-Pacific	2014-03-04	5	0	1.17	6.57	0.46	0.102525	-1.85073	0.252146	5.19351	5.39931	4.81888	0	0	3.75484e+08	48.12	0	0.0646	3.78582
-8.49553	116.881	Central Indo-Pacific	2014-03-04	5	0	1.38	10.6	0.65	0.128011	-1.86853	0.246109	5.12104	5.42681	5.76272	0	0	3.5272e+08	15.72	0	0.109109	3.78827
-8.49308	116.868	Central Indo-Pacific	2014-03-04	5	0	1.38	10.6	0.65	0.128011	-1.86853	0.246109	5.19351	5.39931	4.81888	0	0	3.536e+08	48.55	0	0.0774	3.78827
18.1365	-78.0383	Tropical Atlantic	2008-11-17	5	0	0.81	6.1	0.25	1.6876	0.597101	0.365198	5.9992	6.03073	6.14652	7.52601e+08	8.91732e+08	1.22499e+10	1329.59	2	0.0348	3.89472
10.0647	125.135	Central Indo-Pacific	2010-07-06	5	3.038	1.892	15.722	0.792	1.66348	0.365557	-0.0116697	5.11065	5.62416	5.10825	0	2.62207e+07	1.70191e+10	36.9	0	0.0582	3.79033
16.0167	146.067	Central Indo-Pacific	2001-07-15	5	1.14	1.25	10.12	0.43	1.67319	0.549067	0.157055	6.29506	6.79079	6.96059	0	1.56623e+09	4.03832e+10	604.72	2	0.0217	3.89822
9.38844	-76.1726	Tropical Atlantic	2017-06-17	5	1.11	1.59	11.79	0.66	1.81108	0.3901	0.266803	5.22193	4.7647	5.06546	0	4.90718e+06	3.69618e+08	94.27	0	0.121296	3.63078
11.2128	123.125	Central Indo-Pacific	2008-04-02	30	0	3.59	25.24	1.64	1.595	0.231923	-0.334931	4.65667	3.74351	4.11321	4.72401e+07	4.72401e+07	2.3721e+10	372.46	0	0.0731	3.77215
10.5219	124.673	Central Indo-Pacific	2006-08-08	5	0	1.75	13.28	0.78	1.77366	0.309775	-0.228871	5.1174	5.16049	3.80843	6.12419e+07	8.76145e+07	2.12423e+10	72.83	0	0.057	3.78605
10.55	124.66	Central Indo-Pacific	2008-07-15	5	2.52	1.87	16.06	0.74	1.77366	0.309775	-0.228871	5.18177	5.52609	3.80843	4.0747e+08	5.03733e+08	2.16512e+10	443.19	0	0.0466	3.78605
12.4589	43.4109	Western Indo-Pacific	2005-03-16	5	0	2	14.7	0.94	1.20152	0.638385	-0.960055	5.93819	5.42551	5.76604	0	0	8.48271e+07	85.99	0	0.100464	3.64899
23.9476	-77.3867	Tropical Atlantic	1998-08-15	5	1.05	0.63	5.3	0.13	0.481755	1.5304	-0.0485185	5.41325	5.54314	5.72817	0	0	1.28931e+10	13500.6	0	0.0404	3.95698
24.14	-74.45	Tropical Atlantic	1998-06-15	5	0	0.8	6.82	0.23	0.605004	1.44462	0.255131	6.39792	6.21972	6.47661	0	0	2.93554e+10	1912.76	2	0.0333	3.98435
14.1973	120.584	Central Indo-Pacific	2016-05-01	5	0	1.4775	12.6575	0.5275	1.52583	0.258389	-0.324108	6.31479	5.93153	6.35575	5.54524e+08	7.26213e+08	3.13441e+10	81.01	1	0.0955	3.73959
-23.32	151.98	Central Indo-Pacific	2006-03-15	5	39.1	11.96	42.21	10.21	-2.5672	0.292523	0.481801	6.66398	7.27207	7.14866	0	0	2.35709e+09	2092.14	2	0.0731	3.68072
22.5285	114.61	Central Indo-Pacific	2005-10-29	5	0.871429	1.76143	12.8543	0.681429	-1.70284	2.99471	-0.642257	6.97893	7.51991	7.22277	1.31954e+08	1.31954e+08	3.1242e+10	123.98	0	0.236973	3.58535
-21.98	152.48	Central Indo-Pacific	2006-03-15	5	3.02	0.79	6	0.26	-2.16426	0.0479722	0.39743	6.61814	7.19977	6.93743	0	0	8.06598e+09	128459	0	0.0736	3.71774
15.9031	108.54	Central Indo-Pacific	2004-05-31	5	0	1.14	8.77	0.39	0.0259815	1.69276	-0.535578	6.07884	5.7762	5.90799	0	1.70613e+08	1.9329e+10	74.26	0	0.150123	3.63583
-17	177	Central Indo-Pacific	2009-03-15	30	1.06	0.7	3.97	0.26	-0.586946	-1.2738	0.0416426	5.55162	6.21373	6.5929	0	0	1.37787e+10	13882.8	2	0.0284	3.98843
26.2795	55.3005	Western Indo-Pacific	2017-02-10	5	0	1.3375	13.91	0.355	-0.354285	2.42519	-1.91083	4.23878	3.99316	4.11197	0	0	7.94014e+07	358.45	1	0.149453	3.63286
-13.9385	126.433	Central Indo-Pacific	2016-05-25	30	4.75	1.79	12.45	0.76	-0.336218	-1.10663	-0.328217	4.17581	4.13358	5.20327	0	0	2.10121e+10	2981.93	0	0.173652	3.79837
-14.0361	125.8	Central Indo-Pacific	2016-05-22	30	10.05	2.03	14.65	0.88	-0.273646	-1.22795	-0.292829	4.03948	3.95344	4.54881	0	0	2.26508e+10	8750.96	0	0.160869	3.79837
-14.2472	125.6	Central Indo-Pacific	2016-05-21	30	10.28	2.032	12.506	0.902	-0.248302	-1.25407	-0.284379	4.07465	3.94392	4.32896	0	0	2.22799e+10	519.1	0	0.111007	3.79837
-13.9287	125.636	Central Indo-Pacific	2016-05-22	30	11.22	1.96	11.21	0.96	-0.191967	-1.38706	-0.262117	4.03948	3.95344	4.54881	0	0	2.31649e+10	261.33	0	0.108911	3.79837
3.203	72.919	Western Indo-Pacific	2003-05-15	5	3.02	0.97	7.84	0.33	1.19338	-1.47648	-0.779886	4.70193	5.29983	4.85109	0	0	2.86413e+07	8713.49	0	0.0763	3.88546
-0.69	73.183	Western Indo-Pacific	2003-05-15	5	0	0.87	7.15	0.33	1.19453	-1.61426	-0.889937	4.75273	4.90507	4.79752	0	0	1.34036e+07	52.87	0	0.0387	3.86615
6.02778	116.052	Central Indo-Pacific	2013-07-01	5	0	0.68	5.74	0.2	1.86539	0.175314	-0.398539	4.6297	4.97068	4.34107	2.22761e+07	4.71042e+07	1.21883e+09	137.3	0	0.0848	3.76403
6.07	100.059	Central Indo-Pacific	2002-08-15	5	0	1.83	19.43	0.62	1.69181	-1.08675	-1.03951	4.07136	5.18474	4.57927	0	0	3.9102e+08	395.43	0	0.14141	3.73395
7.39097	117.359	Central Indo-Pacific	2017-05-05	5	0	1.3	10.44	0.56	1.87253	0.0841557	-0.268302	5.1506	4.97093	5.32253	1.24848e+07	1.24848e+07	1.62052e+09	4097.67	0	0.0731	3.7615
24.887	-77.5239	Tropical Atlantic	2008-08-09	30	0	0.53	3.92	0.14	0.282689	1.67206	-0.144894	5.96779	6.14341	5.92082	0	7.71779e+08	1.71186e+10	11614	0	0.140706	3.93984
10.8136	119.661	Central Indo-Pacific	2012-09-08	5	0	1.11	7.3	0.33	1.72099	0.0193569	-0.41455	4.82743	5.71224	5.67144	0	1.04291e+08	1.32574e+10	2169.55	0	0.0553	3.75182
12.3157	-82.9804	Tropical Atlantic	2003-06-15	5	0	1.85	15.01	0.61	1.68234	0.488411	0.721242	5.88271	6.10078	6.17331	0	0	5.12905e+09	1527.55	2	0.0472	3.67476
12.2656	121.275	Central Indo-Pacific	2013-06-24	30	1.09	1.08	7.07	0.34	1.44679	0.300125	-0.357351	5.59109	5.81184	6.66141	4.65735e+07	3.32978e+08	2.80222e+10	96.79	0	0.0909	3.75245
7.39333	117.344	Central Indo-Pacific	2003-06-18	5	0	1.36	10.58	0.57	1.86952	0.0892522	-0.270463	5.68059	5.88706	5.32253	0	0	1.62741e+09	3045.93	0	0.0731	3.7615
32.33	-64.83	Tropical Atlantic	2003-08-15	5	1.62	0.76	5.44	0.21	-1.79845	3.23929	0.519586	6.50924	7.44542	7.27545	3.59078e+08	3.91125e+08	2.22266e+10	183.82	0	0.0742	3.78605
-20.7377	149.465	Central Indo-Pacific	2016-03-27	30	2.36	0.97	6.86	0.36	-2.29961	0.349723	0.160908	6.8921	7.1723	7.12885	0	0	4.72949e+09	211.24	0	0.0617	3.74379
26.2737	127.969	Central Indo-Pacific	2009-06-15	30	0	1.09	8.32	0.28	-0.786512	2.49412	-0.132892	7.31215	7.02903	7.28728	3.05674e+07	1.29639e+08	9.42025e+10	1948.07	2	0.0427	3.60278
-20.039	148.876	Central Indo-Pacific	2008-06-08	5	0	1.6	10.99	0.61	-2.10101	0.212562	0.149479	7.86173	7.19665	6.85227	1.85569e+06	1.85569e+06	9.07262e+09	562.43	0	0.0584	3.77359
26.3815	126.79	Central Indo-Pacific	2008-05-05	30	0	1.27	11.6	0.37	-0.604702	2.3102	-0.173013	8.03445	7.90126	7.68496	0	8.04614e+09	1.15793e+11	145.52	0	0.0352	3.59598
-16.4122	-38.9908	Tropical Atlantic	2007-11-21	5	0	0.84	6.29	0.31	-1.25453	-1.01713	0.50268	6.52667	6.19571	6.19828	0	0	5.62617e+07	700.15	2	0.149369	3.98699
-16.3903	-38.9769	Tropical Atlantic	2008-03-08	5	0	0.84	6.29	0.31	-1.25063	-1.02014	0.504222	6.32062	6.14125	6.19828	0	0	5.36673e+07	3818.01	2	0.149369	3.98699
-18.737	147.272	Central Indo-Pacific	2003-04-23	5	0	1.3	10.43	0.45	-1.65121	-0.134916	0.19348	6.73215	6.75768	6.93552	5.85444e+06	5.85444e+06	6.24669e+09	56186.8	0	0.0481	3.79346
-16.4245	49.8495	Western Indo-Pacific	2016-05-20	30	1.81	2.32	22.82	0.8	-1.45322	-0.628565	0.0458464	6.27035	6.55089	6.61832	1.42126e+07	1.42126e+07	1.8953e+10	472.87	0	0.0801	3.76322
-19.0383	178.457	Central Indo-Pacific	2011-08-12	5	0	1.01	8.54	0.31	-1.28408	-0.825332	0.157824	6.71197	6.9079	7.11057	5.71999e+07	5.71999e+07	9.01594e+09	397.14	0	0.0472	3.94811
24.4634	123.802	Central Indo-Pacific	2008-08-05	30	0	1.13	7.82	0.42	-0.102536	1.81775	-0.350866	6.84992	8.20367	7.69618	5.36252e+08	7.43162e+09	8.49098e+10	1626.36	1	0.0391	3.62713
24.0753	123.773	Central Indo-Pacific	2008-08-03	30	0	1.25	9.44	0.43	-0.00418137	1.76692	-0.316901	6.83107	8.12144	7.65041	7.50637e+08	9.3203e+09	8.98296e+10	571.99	2	0.0328	3.62713
-17.2898	178.211	Central Indo-Pacific	2004-12-01	5	0	1.19	8.44	0.51	-0.957926	-1.0084	0.0778246	8.1907	7.81779	7.24105	0	1.15529e+08	1.22845e+10	12.01	0	0.0863541	3.99514
-16.02	40.13	Western Indo-Pacific	1999-03-15	5	0	1.52	9.11	0.52	-0.982006	-1.03842	-0.0490531	6.29379	6.47286	6.32802	3.97703e+07	3.97703e+07	1.04822e+10	651.83	2	0.0929	3.77084
-17.283	178.199	Central Indo-Pacific	2004-11-28	5	0	0.94	8.64	0.31	-0.942646	-1.01431	0.0702149	8.38052	7.87136	7.24105	0	1.159e+08	1.23457e+10	134.2	0	0.101117	3.99514
-17.3359	168.411	Central Indo-Pacific	2004-07-29	5	0	1.28	10.09	0.4	-0.813834	-1.12799	0.266555	7.73381	7.46961	7.2751	2.12423e+09	2.12423e+09	3.22031e+10	8264.89	2	0.0338	3.93063
12.4646	-69.9685	Tropical Atlantic	2007-11-17	30	0.2525	0.94	9.1625	0.255	1.06992	1.00703	1.00575	7.99063	8.18169	8.37004	3.59446e+08	3.59446e+08	2.94399e+09	380.02	0	0.044	3.8058
-4.70851	39.4101	Western Indo-Pacific	2016-04-18	30	4.46	1.53	8.64	0.62	-0.823168	-1.21351	-0.0130447	6.51201	6.6904	6.88191	0	0	0	438.45	0	0.05348	3.81853
21.485	-71.527	Tropical Atlantic	2005-11-15	30	4.85	0.76	4.99	0.19	0.958821	1.13806	0.503793	6.75155	6.77451	7.04988	2.16141e+08	2.16141e+08	2.11382e+10	163.14	0	0.0362	3.99986
17.7353	-61.8522	Tropical Atlantic	2003-11-22	5	0	0.77	4.28	0.26	1.15535	0.961918	0.713175	7.18513	7.3022	7.22576	2.37902e+08	2.37902e+08	3.14569e+10	818.9	2	0.0758	4.02291
17.0675	-61.6653	Tropical Atlantic	2003-11-20	30	0.81	0.931667	6.785	0.283333	1.19001	0.935767	0.754973	7.22451	7.24499	7.30441	1.06521e+08	1.06521e+08	2.73645e+10	149.33	2	0.031	4.00358
19.34	-69.499	Tropical Atlantic	2005-10-15	75	3.97	0.74	4.03	0.23	1.1415	0.991695	0.776501	7.19326	7.22463	6.75426	1.0861e+07	1.0861e+07	1.50484e+10	1505.03	2	0.0413039	3.99996
17.711	-64.652	Tropical Atlantic	2005-11-15	30	5.10857	0.855714	7.54143	0.228571	1.25191	0.902783	0.619225	6.60061	6.68188	7.19209	2.34323e+06	2.34323e+06	3.54548e+10	1335.04	1	0.0449	4.00777
19.8761	-71.331	Tropical Atlantic	2006-06-11	5	0	0.91	5.09	0.32	1.19608	0.968381	0.710644	7.98992	8.097	7.07214	0	6.79857e+07	1.08874e+10	3076.41	0	0.045	3.99858
14.7583	-60.96	Tropical Atlantic	2003-11-06	30	1.24	0.9	6.17	0.3	1.33282	0.831993	0.842082	6.7444	7.36484	7.31746	2.82072e+07	2.82072e+07	1.32004e+10	698.65	2	0.0743	3.96338
-16.2301	179.105	Central Indo-Pacific	2004-12-09	5	0	1.11	10.18	0.41	-0.457505	-1.34775	0.0662794	6.87988	6.57845	5.79011	0	3.64435e+07	1.00228e+10	716.11	0	0.067	4.01618
-12.8834	48.6348	Western Indo-Pacific	2016-04-14	75	3.14	1.48	11.82	0.59	-0.576888	-1.34148	-0.300881	4.96795	5.1135	4.2731	0	0	7.02119e+09	206.95	0	0.0845	3.77472
-13.6051	47.8049	Western Indo-Pacific	2016-04-20	75	2.63	1.19	9.09	0.43	-0.557382	-1.37045	-0.33363	4.19604	4.34751	4.14322	0	0	7.66917e+09	891.57	2	0.0855	3.77298
10.9307	-85.7997	Tropical Eastern Pacific	2009-06-21	5	0	3.21	18.12	1.68	1.36557	0.396208	0.126521	6.93781	6.65949	6.66665	0	0	1.38625e+09	12.58	0	0.2411	3.61061
-13.0349	48.5494	Western Indo-Pacific	2016-04-15	75	4.09	1.41	11.65	0.54	-0.520708	-1.3908	-0.321792	4.81466	4.91414	4.39776	0	0	6.92672e+09	366.44	0	0.0766	3.77472
12.5316	124.105	Central Indo-Pacific	2013-05-17	5	1.31	1.81	14.9	0.7	1.24534	0.624325	-0.0236089	6.03381	5.9563	5.5466	3.79681e+07	1.79658e+08	3.6746e+10	3.83	0	0.0541	3.7689
-13.5589	48.0954	Western Indo-Pacific	2016-04-19	75	3.25	1.53	12.31	0.56	-0.478875	-1.43117	-0.305326	4.32043	4.20051	3.79297	0	0	7.69033e+09	211.65	0	0.0757	3.77298
13.412	-81.334	Tropical Atlantic	2005-11-15	5	0	1.27	10.6	0.41	1.59268	0.62051	0.829798	6.19179	6.64158	7.07732	1.57111e+09	1.57111e+09	1.03514e+10	4311.67	2	0.0578	3.72896
21.61	-83.102	Tropical Atlantic	2005-11-15	5	2.29	1.19	9.68	0.43	1.09261	0.92946	-0.271713	6.36998	6.60938	6.37576	9.25289e+08	9.25289e+08	1.56266e+10	3845.47	0	0.276297	3.87703
21.8343	-84.4898	Tropical Atlantic	1999-07-09	5	0	0.99	10.42	0.24	1.18521	0.93015	-0.0507213	6.42547	6.89047	6.57524	0	2.73736e+08	1.64489e+10	128.32	0	0.0317	3.86075
21.583	-81.633	Tropical Atlantic	2005-08-15	30	0	1.07	6.18	0.38	1.06425	0.963871	-0.322408	5.79534	6.36942	6.22745	2.75292e+08	1.07938e+09	1.75181e+10	5328.22	2	0.0468	3.89238
16.0856	-87.0042	Tropical Atlantic	2006-07-20	5	0	1.48	11.34	0.57	1.46746	0.616004	0.276265	7.26472	6.74851	5.49457	0	5.49439e+08	1.26011e+10	1563.65	0	0.0442	3.74002
16.0754	-86.929	Tropical Atlantic	2006-07-28	5	0	1.61	12.71	0.66	1.47695	0.620294	0.30517	7.26472	6.74851	5.49457	0	5.79199e+08	1.29382e+10	580.18	0	0.0487	3.74002
-15.86	-146.214	Eastern Indo-Pacific	2005-07-31	5	0	1.11	6.92	0.44	-0.208687	-1.71376	-0.153463	6.33197	6.33111	6.47847	0	0	3.78733e+08	371.98	2	0.0268	4.09482
-8.47997	119.836	Central Indo-Pacific	2014-04-25	5	1.11	1	5.71	0.42	0.106853	-1.70473	0.451108	4.38682	4.60846	4.70676	4.47412e+07	4.47412e+07	4.14752e+08	142.88	0	0.064	3.79919
14.8092	121.838	Central Indo-Pacific	2012-08-15	5	3.7	1.76	9.34	0.73	1.34423	0.287673	-0.54056	7.3697	7.3697	6.2068	7.90231e+07	1.13495e+09	3.92335e+10	5274.33	2	0.0581	3.74026
18.4306	-72.7897	Tropical Atlantic	2016-01-31	5	0	1.3	9.23	0.43	1.69517	0.612533	0.420412	6.93249	7.41625	6.97329	0	0	6.93817e+09	74.34	0	0.0332	3.94731
15.2072	145.691	Central Indo-Pacific	2001-07-15	30	0	1.37	11.2	0.5	1.73295	0.49525	0.212436	6.51757	6.94393	6.9322	0	1.58537e+09	3.82435e+10	2665.71	1	0.0214	3.90043
-8.3915	119.799	Central Indo-Pacific	2014-04-25	5	2.46	1.19	6.18	0.66	0.216323	-1.88341	0.395311	4.38682	4.60846	4.70676	5.15804e+07	5.15804e+07	3.93581e+08	16.18	0	0.051	3.79919
-14.2369	125.599	Central Indo-Pacific	2016-05-21	75	11.26	2.04	12.51	0.89	-0.231535	-1.28996	-0.278892	4.07465	3.94392	4.32896	0	0	2.22542e+10	61.67	0	0.111007	3.79837
10.4035	122.511	Central Indo-Pacific	2006-08-25	5	0	2.45	15.38	1	1.55969	0.261553	-0.301216	6.37079	7.0148	6.16341	3.41835e+07	1.02192e+08	1.29515e+10	11.33	0	0.0986	3.77727
-8.33732	116.724	Central Indo-Pacific	2016-07-01	75	2.75	1.29	5.89	0.63	0.252435	-1.94582	0.242135	4.08239	4.32487	5.56704	0	0	2.53091e+08	178.18	0	0.0532	3.78827
11.3126	119.665	Central Indo-Pacific	2013-05-08	5	1.05	1.14	8.73	0.36	1.69269	0.175952	-0.294733	4.83338	5.29266	5.56414	3.33173e+08	3.73927e+08	1.66965e+10	63.91	0	0.064	3.75182
11.2617	119.676	Central Indo-Pacific	2013-05-09	30	0	1.11	9.59	0.28	1.68871	0.171441	-0.304916	4.83338	5.29266	5.56414	3.49256e+08	3.88757e+08	1.65579e+10	134.35	0	0.0562	3.75182
11.4836	119.88	Central Indo-Pacific	2013-05-10	5	2.53	1.85	14.85	0.66	1.70639	0.194671	-0.265343	5.391	5.57885	5.97449	2.63921e+08	3.12833e+08	1.90983e+10	382.39	0	0.0571	3.75182
11.4959	119.873	Central Indo-Pacific	2013-05-09	30	2.53	1.85	14.85	0.66	1.70639	0.194671	-0.265343	3.76282	4.69372	5.1927	2.61258e+08	3.10515e+08	1.91766e+10	279.23	0	0.0552	3.75182
11.2369	119.357	Central Indo-Pacific	2013-04-30	5	0	1.42	10.75	0.45	1.69596	0.122948	-0.380764	4.73767	5.31729	5.22644	4.20703e+08	4.53979e+08	1.68676e+10	251.18	0	0.0496	3.7452
10.5422	124.634	Central Indo-Pacific	2008-07-23	5	5.34	1.99	16.51	0.82	1.77597	0.304182	-0.23292	5.18177	5.52609	3.80843	4.01721e+08	4.99517e+08	2.14294e+10	383.03	0	0.0466	3.78605
14.7572	120.239	Central Indo-Pacific	2005-02-21	5	0	4.245	31.7125	1.37	1.70432	-0.0589453	-0.444732	6.2969	6.42355	6.01064	8.40273e+08	1.35481e+09	3.22817e+10	518.24	0	0.0752	3.7244
11.7702	120.137	Central Indo-Pacific	2013-05-26	5	1.17	1.69	14.2	0.65	1.81019	0.110247	-0.254815	6.13484	5.98756	6.21175	1.89746e+08	2.59724e+08	2.13958e+10	81.03	0	0.0652	3.74543
-0.56475	130.519	Central Indo-Pacific	2019-08-23	5	0	2.22	11.82	1.15	0.74462	-1.83897	0.912008	5.61615	5.13378	4.54505	0	0	0	64.02	0	0.148625	3.85216
3.73006	72.7581	Western Indo-Pacific	2013-07-04	5	1.06	1.09	9.69	0.32	1.15245	-1.50669	-0.777291	4.45903	4.47372	4.93019	0	0	6.1354e+07	2934.66	0	0.0765	3.88709
3.43831	73.6004	Western Indo-Pacific	2018-05-18	5	3.49	1.06	8.28	0.38	0.983059	-1.71318	-0.800668	4.90486	4.93777	4.99106	0	0	5.65415e+07	6024.39	0	0.0627	3.88387
3.46594	73.6517	Western Indo-Pacific	2018-05-19	5	1.26	1.11	8.78	0.4	0.964154	-1.72816	-0.803418	4.98849	5.01372	5.10188	0	0	6.20037e+07	11011	0	0.0555	3.88387
4.57022	73.3775	Western Indo-Pacific	2014-09-09	5	0	1	9.59	0.24	1.01356	-1.66332	-0.804364	5.37918	5.15915	5.14869	0	0	1.58415e+08	3877.12	2	0.0828	3.88657
7.353	117.137	Central Indo-Pacific	2017-05-06	5	0	1.77	17.56	0.53	1.85003	0.127946	-0.283942	5.13101	4.93129	5.17935	1.12707e+07	1.12707e+07	1.59245e+09	1298.27	2	0.0969	3.7615
7.20342	116.843	Central Indo-Pacific	2015-09-05	5	0	1.82	19.23	0.6	1.81979	0.187154	-0.322248	4.84164	5.50719	5.58102	0	7.61109e+06	1.53826e+09	32.41	0	0.0647	3.7615
6.37425	116.343	Central Indo-Pacific	2014-07-17	30	0	0.77	7.3	0.21	1.72485	0.330826	-0.448134	4.63235	5.01118	4.42313	0	0	1.20674e+09	232.26	0	0.15947	3.76403
6.85558	116.861	Central Indo-Pacific	2017-04-16	5	0	2.02	23.76	0.56	1.82482	0.13086	-0.398821	5.57742	5.37957	5.63827	7.41792e+06	7.41792e+06	1.27674e+09	302.92	0	0.106235	3.7615
-3.09072	135.563	Central Indo-Pacific	2010-07-28	5	0	1.56	11.86	0.7	1.4142	-1.01305	1.23507	3.51508	3.84385	3.82992	0	0	1.3985e+07	174.1	0	0.0692	3.87358
26.0773	-80.1076	Tropical Atlantic	2016-09-12	75	0	0.63	5.25	0.15	0.321709	1.55494	-0.294086	5.03163	6.29353	6.17464	1.39468e+07	1.7475e+07	1.63641e+10	205	2	0.0473	3.90491
12.3173	121.359	Central Indo-Pacific	2013-06-24	30	3.25	1.5	15.46	0.42	1.3925	0.318121	-0.398617	5.59109	5.81184	6.66141	4.48958e+07	3.52805e+08	2.84964e+10	394.15	0	0.0697	3.75245
32.51	-64.772	Tropical Atlantic	2005-07-15	5	0	0.47	3.51	0.09	-1.8381	3.26501	0.546621	7.35088	7.319	7.36356	0	3.64445e+08	2.40858e+10	16150.9	2	0.0391	3.73318
25.0061	-77.2262	Tropical Atlantic	2008-08-10	30	1.37	0.87	6.56	0.27	0.119288	1.73034	-0.355537	5.94316	6.10975	5.8686	0	6.2216e+08	1.76469e+10	4341.92	0	0.0954	3.9497
25.2223	-78.0327	Tropical Atlantic	2013-09-10	5	0	0.84	7.65	0.24	0.168737	1.70014	-0.294552	5.45862	5.68102	5.26726	1.31351e+08	1.08936e+09	1.80662e+10	5070.37	1	0.0471	3.93984
19.2314	-96.1269	Tropical Atlantic	1999-07-22	5	0	1.76	12.65	0.71	-0.297111	1.97153	-0.405407	7.24352	7.24352	5.98101	7.27546e+07	8.98697e+07	8.26638e+09	1612.82	0	0.180064	3.62327
19.1739	-96.0922	Tropical Atlantic	1999-07-19	5	0	1.62	12.85	0.63	-0.285799	1.96233	-0.392356	5.6034	6.64136	5.62308	6.87124e+07	8.31054e+07	7.95742e+09	171.75	2	0.149659	3.62327
-16.818	179.583	Central Indo-Pacific	2000-04-15	75	0	1.1	7.75	0.39	-0.92216	-1.07775	0.0402235	5.61819	6.67015	6.5234	5.09374e+07	5.09374e+07	1.00625e+10	1578.06	2	0.0399	4.00868
12.5478	124.119	Central Indo-Pacific	2013-09-11	5	10.41	1.87	12.01	0.82	1.24534	0.624325	-0.0236089	4.65235	5.61736	5.5466	1.72366e+08	3.22626e+08	3.74449e+10	103.88	0	0.0442	3.7689
18.003	-67.332	Tropical Atlantic	2005-12-15	5	5.66	0.83	8.47	0.24	1.41325	0.789218	0.47182	6.42889	6.61404	7.01206	2.38935e+07	2.38935e+07	1.59684e+10	12674.5	2	0.0632	3.99539
12.585	-81.686	Tropical Atlantic	2005-09-15	5	6.45	1.31	7.89	0.48	1.6326	0.578282	0.792533	5.21292	6.12098	6.49164	0	0	4.49674e+09	339.12	0	0.0337	3.71843
9.58	-79.67	Tropical Atlantic	2005-09-15	30	0	1.7	12.31	0.53	1.69283	0.467114	0.57581	4.76039	5.58026	5.26979	0	0	7.59273e+08	175.73	2	0.0717	3.63025
11.7557	120.143	Central Indo-Pacific	2013-05-25	5	1.17	1.69	14.2	0.65	1.81019	0.110247	-0.254815	6.13484	5.98756	6.21175	1.92041e+08	2.61299e+08	2.13003e+10	107.04	0	0.0651	3.74543
6.81228	117.36	Central Indo-Pacific	2017-04-23	5	0	1.01	6.42	0.39	1.95438	-0.056242	-0.329689	5.31523	4.92157	5.26243	7.64601e+06	7.64601e+06	9.59907e+08	1099.58	0	0.170737	3.7615
11.81	102.38	Central Indo-Pacific	2008-01-15	75	0	1.45	12.11	0.47	1.29837	-1.44383	-0.908939	5.40746	4.93445	4.75977	0	0	8.64033e+08	152.97	0	0.0632416	3.64837
11.052	103.087	Central Indo-Pacific	2003-02-26	30	0	1.692	15.038	0.488	1.32069	-1.46357	-0.92065	4.46214	5.0512	4.66242	0	0	1.05157e+09	45.67	0	0.113522	3.66345
6.043	99.93	Western Indo-Pacific	2002-08-15	5	0	1.49	18.02	0.4	1.69855	-1.1446	-1.02926	4.07136	5.18474	4.57927	0	0	3.67357e+08	11782.7	0	0.135523	3.73395
26.6372	-77.0385	Tropical Atlantic	1999-08-15	5	1.29	0.64	4.13	0.19	0.0431486	1.82761	-0.0742405	5.58366	6.14997	6.24687	0	3.68936e+08	3.51529e+10	1109.74	2	0.0422	3.91771
25.0943	-77.1407	Tropical Atlantic	2008-08-12	5	1.01	0.68	6.59	0.17	0.109802	1.74004	-0.356091	5.94316	6.10975	5.8686	0	6.22881e+08	1.9379e+10	1626.54	0	0.11668	3.9497
23.2522	119.666	Central Indo-Pacific	2018-06-10	5	0	1.26	9	0.5	-0.717863	2.14181	-0.326916	7.01048	7.34655	7.42044	0	4.15383e+08	4.11627e+10	47.96	0	0.0787	3.61919
26.3192	-80.0723	Tropical Atlantic	2008-09-29	5	0	0.87	6.01	0.24	0.378636	1.52234	-0.25424	5.78296	6.63662	6.312	5.23845e+08	6.37028e+08	1.85034e+10	206	2	0.0439	3.90491
6.94094	117.019	Central Indo-Pacific	2017-04-18	5	0	1.07	8.05	0.37	1.85594	0.0974157	-0.371033	5.50201	5.37962	4.98536	8.36835e+06	8.36835e+06	1.25891e+09	1141.3	0	0.186645	3.7615
8.66267	98.2346	Western Indo-Pacific	2003-11-28	5	0	1.79	15.81	0.55	0.965742	-1.81609	-0.85045	5.75148	5.29773	4.58492	3.20388e+07	3.20388e+07	6.8054e+08	1064.19	1	0.112942	3.69002
11.7804	43.9072	Western Indo-Pacific	2005-03-24	5	0	2.63	13.72	1.8	1.22242	0.520004	-0.832007	5.47194	4.67124	4.84472	0	0	2.03792e+08	56021.3	2	0.0745	3.64602
26.2567	127.403	Central Indo-Pacific	2013-08-14	30	1.24	1.16	9.05	0.35	-0.741352	2.42995	-0.0282013	6.25526	7.28457	7.40653	3.82194e+07	3.99302e+09	1.06357e+11	74.57	2	0.0373281	3.59598
25.0064	125.277	Central Indo-Pacific	2016-09-02	75	10.82	1.33	12.13	0.38	-0.339802	2.04455	-0.264761	5.87875	7.49698	7.6472	3.08185e+07	7.55966e+08	9.55316e+10	8228.82	2	0.0544	3.60966
-23.1506	43.5713	Western Indo-Pacific	2009-04-09	5	0	1.38	9.78	0.52	-1.49045	-0.45099	-0.163665	7.97038	7.89068	7.39606	6.251e+08	6.251e+08	8.45636e+09	4050.31	0	0.158604	3.69979
-16	145.967	Central Indo-Pacific	2016-10-30	5	0	1.37	8.44	0.51	-1.25528	-0.477426	0.236725	7.64452	6.87874	7.37736	0	0	8.63482e+09	53198.1	2	0.0298	3.84805
-6.69964	39.2632	Western Indo-Pacific	2016-05-04	75	2.75	1.6	13.03	0.57	-0.83135	-1.14512	-0.101642	6.70912	6.75848	6.64898	0	0	1.57969e+07	90.14	0	0.0631	3.81366
-9.04844	-35.2	Tropical Atlantic	2006-02-15	5	0	0.93	8.3	0.2	-0.552735	-1.49408	0.0596151	6.41796	6.53028	6.35894	0	0	0	3586.37	2	0.0718	3.94062
24.3655	54.1008	Western Indo-Pacific	2011-09-15	75	5.37	1.86	22.5	0.54	-0.933667	2.92427	-2.67858	4.99182	5.23439	5.02564	0	0	577925	1325.71	0	0.175249	3.62755
26.2972	56.3343	Western Indo-Pacific	2010-10-22	5	0.35	1.35667	14.12	0.37	-0.220974	2.26008	-1.78352	3.48549	3.70273	3.34026	0	0	1.68044e+08	9.08	0	0.237558	3.63147
26.298	56.331	Western Indo-Pacific	2010-10-22	5	0.35	1.35667	14.12	0.37	-0.220974	2.26008	-1.78352	3.48549	3.70273	3.34026	0	0	1.67635e+08	50.09	0	0.263657	3.63147
-13.6043	47.811	Western Indo-Pacific	2016-04-20	75	2.63	1.19	9.09	0.43	-0.557382	-1.37045	-0.33363	4.19604	4.34751	4.14322	0	0	7.65653e+09	909.73	2	0.0855	3.77298
-8.72061	116.021	Central Indo-Pacific	2016-04-23	75	15.94	2.2	18.28	0.69	-0.0759358	-1.72904	0.168659	3.87342	5.26423	5.87037	0	0	4.28698e+08	318.53	0	0.0484	3.78259
-8.71147	115.914	Central Indo-Pacific	2016-04-23	75	11.01	1.75	16.77	0.6	-0.0630574	-1.75063	0.15972	3.87342	5.26423	5.87037	0	0	4.16716e+08	378.05	1	0.0833	3.78259
12.3829	121.452	Central Indo-Pacific	2013-06-26	75	5.53	1.47	16.75	0.36	1.36867	0.310125	-0.433438	6.41305	6.79138	7.00624	4.03091e+07	3.56594e+08	2.81618e+10	127.68	0	0.0569	3.75245
10.2976	124.147	Central Indo-Pacific	2004-07-14	5	0	2.71	19.99	1.29	1.7738	0.269422	-0.189928	2.05224	2.0452	2.11837	3.93374e+08	6.53487e+08	1.62539e+10	3154.55	0	0.0676	3.78374
10.9897	119.297	Central Indo-Pacific	2013-05-04	30	0	2.78667	17.84	0.936667	1.70064	0.108117	-0.413679	4.56747	5.38194	5.23039	5.98985e+08	6.26861e+08	1.4938e+10	240.11	0	0.0671	3.7452
12.9347	92.9558	Western Indo-Pacific	2010-05-15	30	6.17	1.08	7.53	0.33	1.28934	-1.12	-0.723943	4.28103	5.51496	5.59566	0	0	4.01933e+09	635.95	0	0.048	3.63557
5.72631	73.4046	Western Indo-Pacific	2018-08-09	5	0	0.94	6.67	0.35	0.747809	-1.84081	-0.781138	5.27705	5.14773	5.20227	0	9.04357e+07	4.75052e+08	1246.26	0	0.0490335	3.8832
7.18608	116.864	Central Indo-Pacific	2015-09-04	5	1.13	1.04	9.28	0.4	1.82692	0.171491	-0.33242	4.84164	5.50719	5.58102	0	8.16532e+06	1.51796e+09	471.33	0	0.0647	3.7615
7.11925	117.509	Central Indo-Pacific	2017-04-24	5	0	1.29	7.55	0.58	1.90804	0.0477495	-0.264909	5.22306	4.76799	4.6908	1.07864e+07	1.07864e+07	1.22921e+09	19409.5	2	0.0706	3.76638
5.89558	95.2376	Western Indo-Pacific	2016-06-01	75	5.84714	1.52429	13.3843	0.558571	1.2722	-1.40991	-0.829999	5.36622	5.33441	5.6238	0	0	1.94942e+08	85.35	0	0.0617	3.74626
5.77751	95.3369	Western Indo-Pacific	2016-06-02	75	8.74	2.37	23.01	0.78	1.31028	-1.38568	-0.846479	5.53334	5.42273	4.99442	0	0	1.85047e+08	102.68	0	0.0485	3.74626
-8.70067	157.441	Central Indo-Pacific	2007-05-03	5	15.97	2.23	16.26	0.87	0.341589	-1.9023	-0.0496764	5.17402	6.53764	5.99503	2.57844e+06	2.57844e+06	1.08215e+09	839.48	0	0.0394	3.93626
5.82574	95.3783	Western Indo-Pacific	2016-06-03	75	3.41	2.35	22.99	0.81	1.36148	-1.31075	-0.847058	4.98113	5.02325	4.49497	0	0	1.87516e+08	115.45	0	0.0502	3.74626
6.56536	99.3472	Western Indo-Pacific	2018-06-22	5	0	1.9	19.97	0.58	1.52347	-1.29981	-1.05219	3.8953	4.07217	4.38459	0	3.86071e+07	3.883e+08	173.39	0	0.093	3.72077
-2.68389	150.641	Central Indo-Pacific	2008-09-09	5	0	1.77	11.61	0.9	0.843083	-2.37005	0.185355	4.40798	4.58631	4.27468	0	0	0	226.05	0	0.0496	3.92044
-2.56917	150.776	Central Indo-Pacific	2008-09-06	5	0	2.38	17.26	1.09	0.848507	-2.40609	0.154888	4.63514	4.81767	4.39283	0	0	0	56.71	0	0.0417	3.92044
12.9627	100.653	Central Indo-Pacific	2003-11-01	5	0	1.76	16.39	0.55	1.49195	-0.680463	-0.941266	5.70791	5.31067	5.23713	1.23332e+08	1.23332e+08	7.1153e+08	59.25	0	0.163755	3.63351
25.5777	-80.1137	Tropical Atlantic	2014-09-19	30	3.59	0.7	4.69	0.2	0.124685	1.68901	-0.419261	4.93597	5.90783	6.20308	5.31701e+07	5.31701e+07	1.32733e+10	4917	2	0.153626	3.90491
21.1334	-86.7405	Tropical Atlantic	2009-09-10	5	1.09	0.84	6.25	0.27	1.21412	0.868031	0.39892	5.78507	6.94354	6.72991	0	1.72429e+07	2.12826e+10	104.34	1	0.0639	3.80288
7.33883	117.356	Central Indo-Pacific	2003-06-19	30	0	1.49	13.81	0.56	1.877	0.0775547	-0.269926	5.59149	5.8476	5.17935	0	0	1.54321e+09	2654.09	2	0.0721	3.7615
26.3978	-76.9885	Tropical Atlantic	1999-08-15	5	0	0.58	5.28	0.14	0.0748533	1.82817	-0.0334035	5.42698	5.95439	6.31016	0	3.32892e+08	3.6677e+10	295.81	0	0.0356	3.93717
-16.1783	145.888	Central Indo-Pacific	2006-03-17	5	0	1.5	8.81	0.58	-1.36057	-0.338402	0.2172	6.33442	7.42218	7.27308	5.89805e+06	5.89805e+06	8.17474e+09	45047.5	0	0.0535	3.84805
15.354	-61.205	Tropical Atlantic	2005-10-15	75	13.88	1.74	13.87	0.48	1.30227	0.853389	0.846497	6.1601	6.58001	7.23915	1.01648e+07	1.01648e+07	1.98295e+10	4602.88	2	0.032	3.96338
-12.8697	45.2697	Western Indo-Pacific	2003-12-04	5	0	1.22	9.28	0.48	-0.711738	-1.22675	-0.375852	4.34886	4.44546	4.30004	0	0	5.64206e+09	5196.67	0	0.0613	3.78084
-10.3	150.416	Central Indo-Pacific	2000-01-15	30	0.9175	3.015	22.065	1.2025	-0.510576	-1.25507	0.0661405	6.07453	6.43635	6.26953	0	0	2.36985e+09	681.49	0	0.12555	3.91364
20.6294	92.3292	Western Indo-Pacific	2005-12-31	5	1.52	1.58	13.16	0.61	1.15282	0.602577	-0.159296	6.01175	5.5205	5.20174	0	0	1.0542e+10	263.18	0	0.285206	3.53917
-7	71	Western Indo-Pacific	2005-04-15	75	4.17	1.45	14.72	0.48	-0.152326	-1.72602	0.00440281	4.78706	6.37109	6.32524	1.1298e+08	1.34914e+08	3.06864e+09	51194.2	2	0.0371	3.80779
9.775	-75.787	Tropical Atlantic	2005-08-15	75	2.68	1.5	10.61	0.62	2.02163	0.240161	0.17042	4.61271	5.39632	4.65948	0	0	4.8494e+08	1214.3	0	0.137677	3.67094
9.777	-75.785	Tropical Atlantic	2006-02-15	5	0	1.5	10.61	0.62	2.02163	0.240161	0.17042	5.61743	5.11507	4.65948	0	0	4.85433e+08	1439.57	0	0.137677	3.67094
6.44	99.69	Western Indo-Pacific	2005-05-15	5	0	1.97	15.18	0.62	1.56263	-1.21092	-1.10279	5.78136	5.42773	4.49045	2.09893e+07	2.09893e+07	4.24064e+08	739.32	0	0.174162	3.73395
11.7447	43.2073	Western Indo-Pacific	2005-03-20	5	0	1.8	9.18	1.01	1.4575	0.457261	-1.00602	5.4422	4.88722	4.54996	0	0	1.16119e+08	1529.53	0	0.116764	3.64899
12.0747	109.306	Central Indo-Pacific	2005-06-24	5	0	2.03	11.67	1.17	0.688401	0.772998	-0.370241	6.90017	8.06585	7.57602	0	3.10056e+08	1.43256e+10	3988.57	2	0.0706	3.6762
23.71	-76.076	Tropical Atlantic	2005-10-15	75	5.33	0.97	5.39	0.38	0.377583	1.53649	-0.176776	5.59028	5.86324	5.94255	6.10088e+08	6.10088e+08	1.64109e+10	1228.21	0	0.0444	3.96672
-25.2628	152.938	Temperate Australasia	2012-08-20	5	0	1.72	12.15	0.6	-3.0678	0.89086	0.560829	7.73634	7.23558	7.12688	0	0	1.01667e+09	1235	0	0.166431	3.59901
22.5471	114.431	Central Indo-Pacific	2010-09-05	5	3.94	1.7	11.68	0.61	-1.72531	3.02794	-0.653502	5.80845	7.0176	7.22277	1.71458e+08	3.15276e+08	3.02255e+10	28.91	0	0.329957	3.57921
-21.9043	113.968	Central Indo-Pacific	2016-04-30	5	0	1.78	15.29	0.59	-1.96166	-0.27666	-0.37775	7.64634	7.32496	7.51017	0	3.73477e+08	1.72934e+10	1322.6	0	0.0875	3.68902
26.1688	127.346	Central Indo-Pacific	2007-08-29	30	0.95875	1.09875	9.99875	0.2975	-0.689061	2.39436	-0.0249709	6.86511	7.45916	7.4515	3.33364e+09	3.42858e+09	1.04593e+11	139.94	0	0.0414	3.59598
-19.9789	57.6311	Western Indo-Pacific	2016-03-25	75	3.91	0.66	5.19	0.16	-1.76786	-0.480286	0.101691	6.55687	7.25668	7.75538	679410	679410	2.85552e+10	731.76	0	0.0387	3.72751
-23.78	35.516	Western Indo-Pacific	1999-03-15	5	0	0.98	9.13	0.27	-1.7285	-0.406354	0.279858	7.50712	6.89532	7.18558	1.53671e+08	1.53671e+08	3.94557e+09	1120.14	2	0.069	3.68128
21.4476	-158.194	Eastern Indo-Pacific	2004-06-19	5	0	0.81	6.36	0.2	0.372416	1.52905	1.1451	7.26798	7.16042	7.07925	0	0	1.49874e+09	110.48	0	0.02455	3.76224
24.8195	125.141	Central Indo-Pacific	2016-07-30	75	4.41	1.34	9.19	0.44	-0.282101	2.01518	-0.274181	6.91187	7.58928	7.6332	3.88277e+06	1.81185e+09	9.94855e+10	79.69	2	0.0597	3.60966
-13.1369	-38.7469	Tropical Atlantic	2007-12-11	5	0	1.13	9.77	0.42	-0.954919	-1.1826	0.135475	6.79939	6.42058	6.02727	0	0	0	2615.32	2	0.179282	3.97739
15.9722	108.422	Central Indo-Pacific	2004-05-25	5	0	1.25	10.6	0.43	0.00653617	1.70514	-0.530154	6.07884	5.7762	5.90799	0	1.57445e+08	1.96356e+10	73.42	0	0.145578	3.62981
25.073	-80.378	Tropical Atlantic	2006-09-15	5	0	0.6	5.36	0.15	0.0662143	1.74218	-0.4823	5.15601	6.17699	6.48004	4.3372e+08	1.31571e+09	1.20775e+10	5570.47	1	0.15001	3.91656
24.592	-76.806	Tropical Atlantic	1993-06-15	5	0	1.07	8.1	0.36	0.226882	1.65683	-0.36543	6.07786	6.07786	5.85551	7.91496e+07	7.91496e+07	1.6917e+10	56.92	0	0.0441	3.9497
23.6726	-76.2022	Tropical Atlantic	2005-08-15	75	33.86	12.61	48.09	11.69	0.286661	1.55425	-0.353075	5.60778	6.06285	5.93503	1.01111e+07	1.68657e+09	1.51402e+10	5618.13	0	0.199983	3.96672
23.718	-76.254	Tropical Atlantic	2005-08-15	75	30.67	12.26	44.09	11.33	0.301897	1.55425	-0.323369	5.60778	6.06285	5.93503	1.0416e+07	1.70429e+09	1.54089e+10	5592.5	0	0.21415	3.96672
-9.04847	-35.1999	Tropical Atlantic	2006-02-15	30	0	0.93	8.3	0.2	-0.552735	-1.49408	0.0596151	6.41796	6.53028	6.35894	0	0	0	3631.6	2	0.0718	3.94062
18.7417	-64.43	Tropical Atlantic	2003-12-13	30	1.12	0.84	8.01	0.22	1.10585	1.00327	0.60664	7.05868	7.09958	6.99605	2.58718e+07	2.58718e+07	3.19765e+10	1419.53	2	0.0636	4.03074
18.4933	-64.4603	Tropical Atlantic	2005-05-04	5	0	0.7	4.26	0.24	1.13008	0.985117	0.62291	6.7125	6.925	7.04292	0	1.5048e+09	3.15371e+10	45.4	0	0.0577	4.0133
-5.39272	-35.2524	Tropical Atlantic	2007-04-04	5	0	0.99	6.66	0.26	-0.403603	-1.59183	0.0725233	7.30464	8.03825	7.86423	0	0	0	2806.91	2	0.182883	3.87366
-17.539	177.353	Central Indo-Pacific	2003-05-12	5	1.35	0.93	6.9	0.3	-0.675317	-1.14097	-0.0856014	6.35908	7.26654	6.56386	2.34725e+08	2.34725e+08	1.8118e+10	8275.73	0	0.135489	3.96798
-12.7404	45.233	Western Indo-Pacific	2012-09-28	5	0	1.36	11.8	0.47	-0.707253	-1.23993	-0.377602	4.62407	4.44671	4.30004	0	7.04558e+06	5.21604e+09	921.23	0	0.102396	3.78084
12.6244	-61.3506	Tropical Atlantic	2005-03-03	5	0	1.22	12.91	0.4	1.33672	0.825753	0.900265	6.47472	6.71358	7.12321	9.5657e+08	1.33428e+09	7.46284e+09	10.55	0	0.0628	3.91063
20.218	-87.4191	Tropical Atlantic	2009-09-08	30	2.14	1.21333	9.48	0.37	1.31291	0.81118	0.409518	6.00027	6.966	6.92304	0	0	2.09187e+10	791.58	2	0.0324	3.79592
-15.3775	168.131	Central Indo-Pacific	2008-06-20	30	0	1.4	12.8	0.38	-0.41804	-1.42171	0.0654658	6.50918	6.7595	6.78914	6.53065e+08	6.53065e+08	2.18558e+10	210.52	0	0.029	3.95679
-12.9153	48.6069	Western Indo-Pacific	2016-04-16	75	3.94	2.03	14	0.82	-0.551763	-1.35882	-0.300307	4.81466	4.91414	4.39776	0	0	6.90875e+09	74.62	0	0.0789	3.77472
-16.5097	-145.462	Eastern Indo-Pacific	2005-07-25	5	0	1.1	7.36	0.36	-0.317655	-1.62766	-0.103679	6.31171	6.33594	6.49234	0	0	3.91167e+08	259.82	0	0.0519	4.08484
-16.5083	-145.462	Eastern Indo-Pacific	2005-07-23	5	0	1.1	7.36	0.36	-0.317655	-1.62766	-0.103679	6.31171	6.33594	6.49234	0	0	3.90903e+08	463.08	0	0.0519	4.08484
-16.0752	-145.644	Eastern Indo-Pacific	2005-07-21	5	0	1.01	7.32	0.3	-0.25954	-1.66685	-0.102684	6.35893	6.37968	6.48073	0	0	3.12665e+08	3189.02	0	0.0541	4.09482
-15.9012	-145.912	Eastern Indo-Pacific	2005-07-28	5	0	0.99	7.98	0.28	-0.230601	-1.69089	-0.119279	6.29324	6.32767	6.49625	0	0	3.42603e+08	1223.44	0	0.0388	4.09482
11.8374	124.099	Central Indo-Pacific	2006-06-12	30	1.64	2.75	19.68	1.32	1.38753	0.459786	-0.263859	5.90144	5.50891	5.55287	1.53374e+08	1.59043e+08	3.01686e+10	279.76	0	0.0805	3.77415
-5.75417	123.993	Central Indo-Pacific	2005-08-31	5	0	1.31	6.85	0.59	0.101695	-1.6537	0.194228	6.3965	5.46402	5.08066	0	0	9.64782e+07	159.68	0	0.0436	3.81976
-5.47097	123.68	Central Indo-Pacific	2005-08-31	5	0	1.3	9.13	0.67	0.11766	-1.66289	0.166109	6.1288	5.29406	4.93346	0	0	6.78202e+07	1084.42	0	0.0698	3.82128
16.45	119.917	Central Indo-Pacific	1994-10-15	30	0	2.34	14.73	1.01	1.55303	0.158097	-0.470381	3.74062	3.6458	5.19875	9.29203e+08	3.02111e+09	4.9701e+10	940.42	0	0.153288	3.71587
10.0911	73.6401	Western Indo-Pacific	2016-05-11	75	3.25	0.67	3.5	0.21	0.462068	-2.04305	-0.615756	3.72797	4.64082	4.96565	0	1.08076e+07	2.59996e+09	917.67	0	0.0514	3.82303
7.096	171.164	Eastern Indo-Pacific	2006-10-15	5	0	1.06	9.11	0.35	2.07523	0.290262	0.672865	5.27325	6.86262	6.75748	0	0	2.94945e+09	1837.44	0	0.0456	3.8643
3.83672	73.3678	Western Indo-Pacific	2019-09-11	5	0	1	8.23	0.32	1.01417	-1.65589	-0.808343	4.19488	4.31298	4.97511	0	0	8.46739e+07	4337.94	1	0.0717051	3.88709
-4.92118	119.317	Central Indo-Pacific	2016-07-17	5	2.34	1.35	7.71	0.61	0.439546	-2.00376	0.228949	3.41664	3.74783	5.02776	0	0	0	688.16	0	0.0801	3.80183
-8.70661	157.434	Central Indo-Pacific	2005-08-18	5	0	1.81	12	0.79	0.341589	-1.9023	-0.0496764	7.2488	6.7974	5.99503	0	0	1.08347e+09	32.56	0	0.0394	3.93626
-5.74357	110.196	Central Indo-Pacific	2016-05-20	30	0	1.16	6.55	0.53	1.15532	-2.0424	-0.585263	4.13248	5.09128	5.33639	0	0	1.1592e+06	400.07	1	0.0664775	3.77445
-5.74239	110.417	Central Indo-Pacific	2016-05-16	30	3.19	1.58	10.9	0.79	0.885857	-2.3162	-0.449947	4.21748	5.27211	5.51139	0	0	600437	524.83	1	0.0598	3.77445
0.77	120.14	Central Indo-Pacific	2010-05-15	30	0	1.66	12.51	0.58	2.18309	-0.351512	-0.0821612	4.35561	4.66965	4.58786	0	0	0	2446.47	0	0.0466	3.80388
-5.80296	110.164	Central Indo-Pacific	2016-05-21	30	0	1.26	9.04	0.64	1.09002	-2.137	-0.562212	4.13248	5.09128	5.33639	0	0	1.20427e+06	145.22	0	0.0707	3.77445
-5.89937	110.244	Central Indo-Pacific	2016-05-23	30	0	1.48	10.87	0.7	1.00211	-2.24563	-0.512847	4.22289	5.07192	5.28808	0	0	2.1274e+06	4205.48	2	0.0753	3.77445
-5.80419	110.559	Central Indo-Pacific	2016-05-08	30	2.67	1.6	9.73	0.75	0.717398	-2.43545	-0.21949	4.21748	5.27211	5.51139	0	0	1.49189e+06	226.26	2	0.0597	3.7766
-5.90131	110.406	Central Indo-Pacific	2016-05-06	30	2.7	2.06	14.11	0.93	0.758657	-2.43436	-0.270571	4.31328	5.26006	5.42012	0	0	2.1474e+06	505.16	2	0.0639	3.77445
-0.103611	119.773	Central Indo-Pacific	2007-07-16	5	0.5	2.244	16.48	0.968	2.34405	-0.371747	0.0891886	4.30499	4.33128	4.07917	0	0	0	193.2	0	0.0441	3.80609
1.96844	98.3472	Western Indo-Pacific	2005-10-18	5	7.78	2.06	14.82	0.86	0.918422	-2.25027	-0.826823	4.68892	4.78812	3.73903	0	0	8.47019e+07	305.35	1	0.12408	3.77893
-2.67083	150.629	Central Indo-Pacific	2008-09-10	5	0	1.77	11.61	0.9	0.843083	-2.37005	0.185355	4.40798	4.58631	4.27468	0	0	0	528.7	0	0.0504	3.92044
-2.64086	150.761	Central Indo-Pacific	2004-09-03	5	0	2.19	18.7	0.84	0.846302	-2.39144	0.165324	4.92872	4.81109	4.27468	0	0	0	391.73	0	0.0796	3.92044
-2.67986	150.311	Central Indo-Pacific	2004-08-27	5	0	1.8	18.69	0.72	0.843287	-2.40858	0.12875	4.96647	4.75049	4.28607	0	0	0	998.7	0	0.0397	3.91853
-2.67258	150.247	Central Indo-Pacific	2004-08-29	5	0	2	17.53	0.9	0.849663	-2.41897	0.129423	4.96647	4.75049	4.28607	0	0	0	994.68	0	0.0401	3.91853
24.536	-82.1414	Tropical Atlantic	2007-10-11	30	2.68	1.11	10.23	0.35	-0.180661	1.96611	-0.573663	5.39429	6.47545	6.19421	4.30943e+07	4.30943e+07	1.75989e+10	1501	0	0.147646	3.88833
-16.49	-151.71	Eastern Indo-Pacific	2007-05-15	75	1.34	0.96	5.63	0.34	-0.200657	-1.7257	-0.203522	5.56161	6.35445	6.41222	2.11345e+07	2.11345e+07	3.44926e+09	397.88	0	0.0262	4.11781
17.824	-87.994	Tropical Atlantic	2005-09-15	30	6.79	1.52	10.14	0.68	1.2859	0.691476	0.144136	5.2999	5.69438	6.17492	4.97679e+07	4.97679e+07	2.06829e+10	4038.54	2	0.0532	3.75838
11.7065	43.2189	Western Indo-Pacific	2005-03-20	5	0	1.8	9.18	1.01	1.4575	0.457261	-1.00602	5.4422	4.88722	4.54996	0	0	1.20436e+08	1405.33	0	0.0772	3.64899
-23.49	152.09	Central Indo-Pacific	2006-03-15	5	1.03	1.24	9.83	0.35	-2.56937	0.291624	0.483493	6.62018	7.24161	7.15629	0	0	2.2515e+09	1806.04	2	0.0539	3.68072
-22	152.67	Central Indo-Pacific	2006-03-15	5	2.25	0.83	6.82	0.23	-2.16813	-0.00701075	0.400821	6.66906	7.25884	7.00881	0	0	8.82395e+09	148186	2	0.079	3.72015
-21.87	152.19	Central Indo-Pacific	2006-03-15	5	0	0.68	5.34	0.23	-2.10761	0.0293548	0.388566	6.51593	7.10547	6.8423	0	0	7.81002e+09	97365.7	0	0.0531	3.71774
-19.656	63.383	Western Indo-Pacific	2002-02-15	75	0	1.46	12.88	0.4	-1.81846	-0.46918	0.138925	7.66653	8.3308	8.41954	1.4287e+09	1.6871e+09	3.06231e+10	3667.46	2	0.0485	3.72468
-18.2918	178.081	Central Indo-Pacific	2000-04-15	75	5.67	1.25	10.51	0.47	-1.05363	-0.987366	0.145531	5.95222	6.97896	6.93095	1.90781e+08	1.90781e+08	8.90329e+09	3933.45	0	0.0604	3.97467
16.77	-169.501	Eastern Indo-Pacific	1996-09-15	30	0	0.97	8.97	0.2	0.842119	1.1799	1.06223	7.52714	7.42404	7.84912	0	0	2.5795e+09	1647.61	0	0.0518	3.85101
3	-78.16	Tropical Eastern Pacific	1998-05-15	30	38.26	4.15	39.79	1.46	1.25893	0.297286	0.610968	3.88249	3.79379	5.15048	0	0	0	784.05	0	0.115801	3.36225
11.6003	109.15	Central Indo-Pacific	2005-06-23	5	2.118	3.088	23.61	1.56	0.73457	0.639913	-0.374029	7.12905	8.2373	7.84549	0	3.97142e+08	1.2705e+10	576.69	2	0.023	3.6762
17.8989	-66.0153	Tropical Atlantic	2014-05-19	30	0	0.82	6.85	0.2	1.28101	0.882766	0.600672	7.97113	7.59461	7.33817	0	1.24307e+08	2.39705e+10	6766.08	2	0.0328	4.00184
12.2984	-82.9744	Tropical Atlantic	2003-06-15	5	0	1.85	15.01	0.61	1.68456	0.490195	0.726583	5.88271	6.10078	6.17331	0	0	5.07964e+09	348.28	2	0.0472	3.67476
-21.516	35.483	Western Indo-Pacific	1999-03-15	5	0	0.58	3.79	0.18	-1.53068	-0.438945	0.21418	6.93276	6.42919	6.72517	2.96278e+08	2.96278e+08	1.14214e+10	429.45	2	0.112711	3.70988
24.5715	-81.6375	Tropical Atlantic	2015-09-09	30	9.38	1.13	9.38	0.39	-0.149621	1.91497	-0.624374	4.64987	5.72152	6.37985	4.93241e+06	4.93241e+06	1.68782e+10	669	2	0.153334	3.88833
25.2118	-80.3233	Tropical Atlantic	2010-01-26	30	0	0.73	5.34	0.24	0.0557892	1.74008	-0.476306	6.34862	6.18692	6.34839	2.74908e+06	2.74908e+06	1.22556e+10	988	0	0.187476	3.91656
28.372	129.404	Central Indo-Pacific	2013-08-19	5	3.23	1.5	13.13	0.37	-1.0962	2.70879	0.0425026	6.01172	6.86799	7.21595	3.94711e+07	9.10447e+08	5.9412e+10	266.9	0	0.0337	3.54288
28.4025	129.454	Central Indo-Pacific	2013-08-28	75	3.46333	1.38	10.91	0.39	-1.09681	2.70857	0.0369759	6.20068	7.03612	7.03371	3.76914e+07	7.21934e+08	5.94559e+10	54.69	2	0.0458	3.54288
27.8692	128.888	Central Indo-Pacific	2013-09-11	75	4.71	1.27	11.15	0.34	-1.0547	2.70517	0.0615849	6.12914	7.06011	7.24442	2.43466e+08	1.4759e+09	5.98011e+10	114.52	2	0.034	3.54288
28.2	129.4	Central Indo-Pacific	2001-08-15	75	6.25667	0.973333	7.15	0.296667	-1.08124	2.73785	0.00548032	6.40802	7.2885	7.21595	3.61822e+08	1.54482e+09	6.1111e+10	302.65	2	0.0367	3.54288
26.7751	128.203	Central Indo-Pacific	2013-08-25	75	3.69667	1.47333	16.47	0.36	-0.901904	2.56536	-0.0406914	5.9123	6.99554	7.22522	9.16348e+07	6.77342e+09	9.29063e+10	182.87	2	0.0425	3.57139
24.0662	123.762	Central Indo-Pacific	2016-08-10	30	3.47	1.25	9.44	0.43	-0.00418137	1.76692	-0.316901	5.94763	7.31158	7.65041	1.23913e+08	5.96641e+09	8.96326e+10	186.97	2	0.0328	3.62713
-18.1819	178.491	Central Indo-Pacific	2000-04-15	75					-1.12534	-0.92856	0.15647	5.82401	6.76096	6.69172	1.84483e+08	1.84483e+08	8.91153e+09	2561.1	0	0.0801	3.97467
-17.333	179	Central Indo-Pacific	2000-04-15	75	0	0.94	6.96	0.33	-1.01902	-1.00923	0.0868091	5.02188	6.39536	6.59213	9.19862e+07	9.19862e+07	1.33709e+10	10629.7	0	0.0365	4.00191
-6.65438	39.2439	Western Indo-Pacific	2016-05-02	75	2.88	1.74	10.19	0.67	-0.828949	-1.1463	-0.0992709	6.70912	6.75848	6.64898	0	0	1.34348e+07	199.65	0	0.0715	3.81366
19.0591	-69.0808	Tropical Atlantic	2009-12-06	5	2.34	0.96	7.84	0.33	1.16507	0.970692	0.634844	6.41401	6.87703	6.81091	5.03592e+07	5.03592e+07	1.5638e+10	5985.89	0	0.153671	3.99996
23.177	-82.098	Tropical Atlantic	2005-09-15	75	10.11	3.07	17.45	1.55	0.898366	1.13165	-0.0246405	6.85263	7.46281	6.97626	1.05405e+09	1.07777e+09	1.47013e+10	419	2	0.0329	3.89547
-5.39222	-35.2522	Tropical Atlantic	2010-04-30	5	5.2	0.99	6.66	0.26	-0.403603	-1.59183	0.0725233	6.90878	7.18842	7.86423	0	0	0	2661.47	2	0.182883	3.87366
-5.39	-35.255	Tropical Atlantic	2010-05-01	30	5.2	0.99	6.66	0.26	-0.403603	-1.59183	0.0725233	6.73765	7.30825	7.86423	0	0	0	5940.79	2	0.182883	3.87366
-5.38972	-35.255	Tropical Atlantic	2010-05-01	5	5.2	0.99	6.66	0.26	-0.403603	-1.59183	0.0725233	6.73765	7.30825	7.86423	0	0	0	5925.48	2	0.182883	3.87366
-17.644	-149.237	Eastern Indo-Pacific	2002-04-15	5	4.42	0.92	5.86	0.31	-0.419614	-1.5597	-0.189527	6.41641	6.53937	6.56865	0	0	1.27483e+09	7209.53	2	0.0264	4.08539
-8.753	115.161	Central Indo-Pacific	2010-06-15	75	0.904	2.302	17.534	0.804	-0.45302	-1.3498	0.156366	4.82222	5.00194	5.43005	3.50222e+07	3.50222e+07	3.3128e+08	210.91	1	0.0728	3.77953
-15.47	168.138	Central Indo-Pacific	2008-06-26	5	0	1.35	12.88	0.38	-0.427463	-1.41263	0.078717	6.50918	6.7595	6.78914	5.80784e+08	5.80784e+08	2.25946e+10	295.73	0	0.0293	3.95679
-16.4615	123.031	Central Indo-Pacific	2016-03-30	75	2.8	1.36	9.85	0.54	-0.741594	-0.984618	-0.719104	5.17159	4.97195	5.22766	0	0	1.81613e+10	153.61	0	0.115205	3.77444
19.8307	-77.7348	Tropical Atlantic	2005-10-15	75	3.22167	0.711667	5.31333	0.218333	1.45082	0.778972	0.0172606	5.80537	6.21603	6.04399	2.80114e+09	2.80114e+09	8.3173e+09	1258.91	2	0.0266	3.92724
-10.152	123.595	Central Indo-Pacific	2010-05-15	30	3.92	1.76	16.27	0.64	-0.0698975	-1.31865	0.201966	5.00675	5.20763	5.50355	2.71366e+07	2.71366e+07	1.90268e+09	268.58	0	0.456935	3.80999
14.861	122.223	Central Indo-Pacific	2005-07-15	75	5.74	1.78	15.48	0.73	1.35061	0.325488	-0.474455	5.52061	6.87173	6.53947	2.09116e+07	3.80743e+09	4.0893e+10	1324.8	2	0.141245	3.74026
5.25781	73.1633	Western Indo-Pacific	2016-05-01	75	4.87	1.23	12.72	0.35	0.833528	-1.80696	-0.774728	4.3601	4.74745	5.09141	0	0	2.85788e+08	52.08	0	0.0588	3.88657
7.37783	117.202	Central Indo-Pacific	2003-06-19	30	0	1.18	7.44	0.45	1.8628	0.105555	-0.274277	5.68059	5.88706	5.32253	0	0	1.61047e+09	2575.7	0	0.0767	3.7615
24.4395	-77.6981	Tropical Atlantic	1998-08-15	5	1.06	0.83	9	0.24	0.349831	1.60848	-0.0781563	4.92583	5.669	5.47467	0	0	1.38195e+10	2246	0	0.0484	3.94648
24.5448	-77.6837	Tropical Atlantic	1998-08-15	5	0	0.66	5	0.18	0.359193	1.61802	-0.0546105	4.92583	5.669	5.47467	0	0	1.4989e+10	4628.44	0	0.0483	3.93984
9.4726	-78.9238	Tropical Atlantic	2002-06-24	5	0	1.83	17.94	0.59	1.61653	0.525756	0.455059	7.18269	6.45969	5.95472	0	0	6.43983e+08	2301.3	0	0.0916	3.59991
21.5539	-157.848	Eastern Indo-Pacific	2005-02-27	5	0	1.38	11.18	0.33	0.172605	1.65172	1.33469	7.02506	7.32163	7.42031	0	0	1.65094e+09	163.9	2	0.0344	3.74756
-4.6667	39.2833	Western Indo-Pacific	2010-04-15	75	1.22	2.61	23.25	0.87	-0.825234	-1.20972	-0.00134678	6.69812	6.96337	6.9746	0	0	0	662.47	0	0.150901	3.81853
-9.5111	147.179	Central Indo-Pacific	2009-01-15	75	11	1.84	17.28	0.68	-0.910514	-0.961768	-0.125477	7.37259	7.6541	7.3581	0	0	2.19005e+09	50.18	0	0.0965	3.90327
22.2272	-159.464	Eastern Indo-Pacific	2008-03-08	30	0	1.09	10.73	0.25	0.119182	1.69935	1.27607	8.05468	8.12973	7.84245	0	0	1.24777e+09	350.71	2	0.0465	3.76062
22.223	-159.587	Eastern Indo-Pacific	2008-05-10	5	0	0.97	10.38	0.22	0.131997	1.69297	1.25517	7.82943	8.03247	7.84245	0	0	1.17367e+09	380.89	2	0.042	3.77265
21.8898	-159.415	Eastern Indo-Pacific	2009-04-18	5	0	1.0825	9.885	0.2675	0.243479	1.61222	1.22388	7.86804	7.54874	7.61242	0	0	1.18605e+09	506.53	2	0.0270572	3.76062
20.8937	-156.871	Eastern Indo-Pacific	2008-11-16	30	0	1.21	13.7625	0.265	0.357784	1.52308	1.2549	7.11727	7.46004	7.30984	0	0	1.83885e+09	22.24	2	0.032	3.74922
18.086	-87.866	Tropical Atlantic	2005-09-15	5	7.768	1.922	13.164	0.918	1.28095	0.737502	0.202013	6.27259	6.65668	6.70222	7.12925e+07	7.12925e+07	2.55957e+10	720.27	2	0.0363	3.75838
12.466	-81.65	Tropical Atlantic	2005-09-15	5	1	1.39	13.77	0.4	1.63503	0.575072	0.785267	5.21292	6.12098	6.49164	0	0	4.42137e+09	8249	2	0.0289	3.68501
8.409	79.752	Western Indo-Pacific	2005-03-15	5	0	1.14	9.93	0.38	0.314585	-1.76129	-0.637568	7.78139	7.99385	7.38031	2.11114e+06	2.11114e+06	3.92112e+09	10220.7	0	0.277447	3.82242
15.24	145.71	Central Indo-Pacific	2007-08-15	5					1.73149	0.497704	0.216906	6.47174	6.9738	6.9322	1.82175e+08	1.826e+08	3.78528e+10	33268.7	0	0.026	3.90043
8.574	81.242	Western Indo-Pacific	2004-05-15	5	0	0.94	7.9	0.34	1.37983	-0.634688	-0.772097	6.10893	6.19523	6.18673	0	0	6.17394e+09	136.04	2	0.161488	3.79632
24.367	-77.6824	Tropical Atlantic	1998-08-15	5	0	1.15	10.06	0.28	0.347497	1.60229	-0.0894311	5.18433	5.32058	5.46587	0	0	1.33941e+10	807.66	1	0.0458587	3.94648
-4.6922	39.4094	Western Indo-Pacific	2010-04-15	75	1.57	1.53	9.95	0.67	-0.81943	-1.21737	-0.0108954	6.60936	6.87264	6.88191	0	0	0	774.69	0	0.0694	3.81853
-12.317	136.933	Central Indo-Pacific	2005-03-15	5	3.99	1.64	12.39	0.63	-0.656141	-0.88192	-0.330517	4.67681	5.86058	5.91209	4.6621e+09	4.6624e+09	1.10525e+10	89.84	0	0.1833	3.85393
24.3069	-77.6564	Tropical Atlantic	1998-08-15	5	0	0.84	7.96	0.27	0.345359	1.59628	-0.103155	5.18433	5.32058	5.46587	0	0	1.35606e+10	396.89	0	0.0478	3.94648
22.6533	-79.1453	Tropical Atlantic	2001-05-15	5	0	1.46	9.94	0.65	0.617041	1.27293	-0.205405	7.59013	7.06997	6.15142	0	1.29836e+07	1.42258e+10	292.86	2	0.0495	3.9363
9.4233	-82.3242	Tropical Atlantic	2002-06-15	5	0	3.63	22.51	1.86	1.79295	0.241347	0.447318	4.93801	4.76676	4.53386	0	0	6.79247e+08	175.3	0	0.170224	3.5707
5.70422	73.4129	Western Indo-Pacific	2018-08-25	30	0	1.04	7.31	0.34	0.747809	-1.84081	-0.781138	5.27705	5.14773	5.20227	0	8.92941e+07	4.74697e+08	186.1	0	0.0549	3.8832
4.1667	73.5	Western Indo-Pacific	1998-05-15	75	6.75	1.07	6.76	0.35	0.978457	-1.68728	-0.804342	4.45549	4.26441	5.10568	0	0	1.18356e+08	229.27	0	0.0796	3.88504
24.0979	-77.537	Tropical Atlantic	1998-08-15	75	3.075	0.8525	8.415	0.225	0.427023	1.5515	-0.0808957	5.41325	5.54314	5.72817	0	0	1.3016e+10	1121.1	0	0.0408	3.94648
-24.114	152.72	Temperate Australasia	2011-05-24	5	1.07	1.05	7.64	0.33	-2.47642	0.204215	0.503	7.93012	7.70832	7.40946	0	0	2.08541e+09	158.45	0	0.0503	3.64227
28.0729	129.332	Central Indo-Pacific	2016-08-15	30	1.19	1	6.31	0.3	-1.06548	2.72405	0.035377	6.15853	6.91109	7.23085	1.21638e+07	1.38356e+08	6.03019e+10	80.55	2	0.0385	3.54288
-22.2875	113.811	Central Indo-Pacific	2016-05-02	5	0	1.7175	12.7325	0.6125	-2.02181	-0.214687	-0.342763	7.54253	7.48156	7.66523	0	0	1.59386e+10	1483.39	0	0.0659	3.68902
-22.1486	113.868	Central Indo-Pacific	2013-06-12	5	1.21	1.725	13.235	0.655	-2.00328	-0.241186	-0.35354	7.78088	7.73506	7.66523	1.52366e+08	1.52366e+08	1.66438e+10	706.16	2	0.0656	3.68902
-22.131	113.877	Central Indo-Pacific	2013-06-16	5	1.21	1.725	13.235	0.655	-2.00328	-0.241186	-0.35354	7.75552	7.73262	7.69243	1.52843e+08	1.52843e+08	1.66042e+10	25.82	2	0.0652	3.68902
-21.9506	113.921	Central Indo-Pacific	2016-04-30	5	0	1.93	16.31	0.71	-1.96881	-0.268645	-0.371248	7.64634	7.32496	7.51017	0	3.06734e+08	1.68863e+10	2626.87	0	0.17515	3.68902
26.3087	127.863	Central Indo-Pacific	2013-09-06	30	2.03714	1.07286	10.3843	0.28	-0.825426	2.51625	-0.112938	6.21677	7.28603	7.35157	1.81277e+08	4.15476e+09	9.64334e+10	1712.43	0	0.0537	3.60278
26.5544	128.131	Central Indo-Pacific	2013-09-16	30	1.26	1.25	11.01	0.29	-0.796285	2.50301	-0.0760392	6.06641	7.10459	7.23462	1.81801e+08	2.89862e+09	9.05267e+10	111.31	0	0.0375	3.57139
-19.808	63.424	Western Indo-Pacific	2006-03-15	5	0	1.26	14.48	0.3	-1.85733	-0.441774	0.155575	8.19167	8.92987	8.41954	3.50701e+07	1.02396e+09	3.1032e+10	2588.89	0	0.0447	3.72468
21.5502	-157.846	Eastern Indo-Pacific	2007-07-28	5	0	1.38	11.18	0.33	0.172605	1.65172	1.33469	7.47566	7.23507	7.42031	0	0	1.65039e+09	74.32	0	0.0344	3.74756
24.7735	125.395	Central Indo-Pacific	2013-08-07	75	0.9875	1.3525	10.5275	0.4275	-0.310891	2.04513	-0.228584	6.3447	7.46294	7.61479	3.14622e+08	3.50423e+09	1.02019e+11	96.62	0	0.0419	3.60966
25.0637	-77.9378	Tropical Atlantic	1998-08-15	5	3.23	0.65	6.01	0.17	0.25675	1.67592	-0.156827	4.62438	5.29433	5.27254	0	0	1.72691e+10	2176.23	0	0.0432	3.93984
24.2532	-77.6292	Tropical Atlantic	1998-08-15	5	0	0.97	7.27	0.29	0.369717	1.5866	-0.0861857	5.18433	5.32058	5.46587	0	0	1.33715e+10	1593.97	0	0.0512	3.94648
-3.80136	39.8369	Western Indo-Pacific	2016-04-02	30	4.02	1.69	16.03	0.64	-0.804781	-1.26245	0.0152281	6.68939	7.18894	7.17046	0	0	0	223.61	0	0.0457853	3.81871
23.2103	-80.4742	Tropical Atlantic	2001-05-25	5	0	0.95	7.69	0.35	0.569163	1.31119	-0.207456	7.60495	6.85148	6.10226	0	8.22596e+06	1.63793e+10	547.72	1	0.0547	3.92365
-16.73	177.55	Central Indo-Pacific	2005-02-15	75	1.62	1.15	9.39	0.39	-0.666546	-1.2229	0.117278	7.49725	7.48149	6.98818	0	1.18608e+08	1.56521e+10	742.05	0	0.0429	3.99514
10.8365	-60.9145	Tropical Atlantic	2009-06-15	5	0	1.51	12.53	0.48	1.29296	0.850414	0.868535	7.6117	6.81065	6.79156	0	0	3.62804e+09	123.57	2	0.387912	3.84926
10.837	-60.9455	Tropical Atlantic	2009-06-15	5	0	1.51	12.53	0.48	1.29296	0.850414	0.868535	7.6117	6.81065	6.79156	0	0	3.61673e+09	15.58	0	0.326964	3.84926
-16.46	-151.78	Eastern Indo-Pacific	2007-06-15	75	0	0.95	6.73	0.33	-0.197769	-1.72835	-0.201813	5.8395	6.39726	6.41222	2.30605e+07	2.30605e+07	3.5744e+09	281.71	0	0.0259	4.11781
-16.44	-151.76	Eastern Indo-Pacific	2007-06-15	75	1.33	0.96	7.48	0.35	-0.195967	-1.72954	-0.205911	5.8395	6.39726	6.41222	2.14325e+07	2.14325e+07	3.50631e+09	221.97	2	0.0272	4.11781
20.575	-78.1198	Tropical Atlantic	2001-08-15	5	0	0.76	6.19	0.21	1.00067	1.01771	-0.453354	5.34011	5.73165	5.50136	0	9.19501e+07	9.32744e+09	502.77	0	0.132896	3.93838
-16.4275	123.089	Central Indo-Pacific	2016-03-31	30	5.19	1.3	9.44	0.51	-0.716234	-1.02446	-0.719772	5.17159	4.97195	5.22766	0	0	1.80698e+10	239.04	0	0.115219	3.77444
-16.4292	123.206	Central Indo-Pacific	2016-03-31	75	4.97	1.08	10.63	0.34	-0.719204	-1.01538	-0.740159	5.41275	5.16725	5.38386	0	0	1.77216e+10	583.05	0	0.114019	3.77444
15.229	145.726	Central Indo-Pacific	2001-08-15	30	0	1.49	12.02	0.53	1.73149	0.497704	0.216906	6.4007	7.09431	6.9322	7.25336e+07	1.69086e+09	3.80612e+10	855.64	0	0.026	3.90043
15.169	145.704	Central Indo-Pacific	2001-08-15	30	0	1.468	11.602	0.53	1.73422	0.495023	0.215659	6.4007	7.09431	6.9322	7.00506e+07	1.6544e+09	3.89581e+10	585.73	0	0.0214	3.90043
7.01	171.367	Eastern Indo-Pacific	2002-09-15	5	0	0.93	6.99	0.32	2.07584	0.288423	0.678831	5.87912	6.88885	6.75748	0	0	2.54378e+09	8081.58	2	0.0249	3.8643
7.167	171.035	Eastern Indo-Pacific	1993-05-15	5	0	1.21	7.87	0.42	2.06253	0.300114	0.677325	8.90765	8.90765	6.88348	0	0	3.13466e+09	477.01	2	0.0447	3.8643
25.0912	-77.3956	Tropical Atlantic	2008-08-15	5	1.06	0.73	6.01	0.2	0.221775	1.7004	-0.190808	5.96779	6.14341	5.92082	0	6.14009e+08	1.8149e+10	720.69	0	0.0402	3.9497
-21.158	55.289	Western Indo-Pacific	2001-03-15	5	0	0.625	5.205	0.165	-1.74282	-0.479055	0.112376	7.28016	7.93895	7.79304	5.8858e+08	5.8858e+08	2.12235e+10	171.85	2	0.0266	3.71727
18.4088	-87.4105	Tropical Atlantic	2000-07-13	30	0	0.83	5.65	0.27	1.35355	0.795733	0.442208	7.12512	6.92735	6.73002	0	9.3546e+07	2.37586e+10	19817.2	0	0.0475	3.77385
20.575	-78.1198	Tropical Atlantic	2001-08-15	5	0	0.76	6.19	0.21	1.00067	1.01771	-0.453354	5.34011	5.73165	5.50136	0	9.19497e+07	9.32761e+09	485.03	0	0.132896	3.93838
20.585	-78.1097	Tropical Atlantic	2001-08-24	5	0	0.89	7.48	0.22	1.00067	1.01771	-0.453354	5.34011	5.73165	5.50136	0	9.14043e+07	9.27747e+09	123.51	0	0.120029	3.93838
9.10757	-81.8225	Tropical Atlantic	2002-06-15	30	0	3.23	20.93	1.4	1.77729	0.254584	0.491489	5.56104	5.29473	5.03495	0	0	5.20173e+08	1603.13	0	0.0867	3.5707
-3.215	40.127	Western Indo-Pacific	2003-04-15	5	4.31	2.03	19.71	0.87	-0.791104	-1.28995	0.106442	6.53141	7.17957	7.35117	0	0	0	93.18	2	0.197499	3.81915
-1.986	41.383	Western Indo-Pacific	2003-04-15	5	0	1.7	20.82	0.53	-0.711587	-1.36412	0.138944	6.24972	7.03737	7.17603	0	0	0	7458.95	2	0.0898	3.81776
24.8449	-77.861	Tropical Atlantic	1998-08-15	5	3.16	0.7	5.94	0.19	0.304705	1.6579	-0.0825924	4.70304	5.58379	5.59979	0	0	1.53465e+10	2797.05	0	0.0442	3.93984
9.423	-82.324	Tropical Atlantic	2002-06-15	30	0	3.63	22.51	1.86	1.79295	0.241347	0.447318	4.93801	4.76676	4.53386	0	0	6.79107e+08	230.47	0	0.170224	3.5707
30.3011	130.654	Temperate Northern Pacific	2016-08-04	75	1.09	1.06	7.95	0.27	-1.71813	3.19786	-0.0779162	6.84377	7.73184	7.88916	710167	9.89114e+07	4.93006e+10	63.49	2	0.0498	3.47229
26.2762	127.7	Central Indo-Pacific	2013-08-22	75	3.14667	1.50667	13.06	0.423333	-0.784688	2.47014	-0.0640879	6.13516	7.22094	7.35157	9.237e+07	4.81746e+09	9.74958e+10	710.5	2	0.0432	3.60278
11.8002	-66.8842	Tropical Atlantic	1999-10-06	5	6.5	0.92	6.5	0.26	1.04297	1.03145	1.0313	6.77231	6.98362	7.29895	0	0	2.17405e+09	636.67	0	0.14688	3.83345
21.5364	-82.3713	Tropical Atlantic	2001-03-10	5	0	1.02	8.56	0.34	1.02248	0.971849	-0.36613	7.34796	6.39257	6.30918	6.54004e+07	6.54004e+07	1.83304e+10	2332.76	2	0.0415	3.89238
26.355	127.143	Central Indo-Pacific	2016-09-22	30	4.93	1.25	11.71	0.34	-0.71427	2.40719	-0.135663	5.98093	7.21918	7.4515	1.79465e+08	1.79465e+08	1.10408e+11	507.22	0	0.0331	3.59598
28.2	-177.35	Eastern Indo-Pacific	2002-09-15	75	7.24	1.04	9.56	0.26	-1.72113	3.16608	0.678046	6.37912	7.08455	7.16347	0	0	2.36073e+07	581.48	2	0.0322	3.68548
-1.22	-90.39	Tropical Eastern Pacific	1998-05-15	75	30.52	4.51	35.76	1.46	-2.8516	0.200311	0.530442	4.35219	5.24764	4.2309	0	0	0	1873.7	0	0.0693	3.12155
-1.35	-89.7	Tropical Eastern Pacific	1998-05-15	75	27.31	4.53	31.1	1.46	-2.85419	0.219895	0.457347	4.35447	5.35882	4.53925	0	0	0	527.87	0	0.0721	3.12155
27.83	-175.83	Eastern Indo-Pacific	2002-09-15	75	4.39	1	9.67	0.27	-1.56298	3.05082	0.698471	6.40311	7.11328	7.15362	0	0	9.01812e+07	4421.05	0	0.0694	3.68257
-24.8362	152.483	Temperate Australasia	1998-03-15	75	11.24	1.95	16.89	0.64	-3.18688	1.02099	0.443975	6.1	6.1	7.13275	0	0	1.08629e+09	612.7	2	0.0949925	3.5982
-24.0017	151.775	Central Indo-Pacific	1998-04-15	75	6.85	1.71	14.05	0.54	-3.05963	0.885722	0.418647	5.9381	6.66141	7.11916	1.75417e+07	1.75417e+07	1.41573e+09	1857.98	2	0.0861961	3.64089
-23.97	151.63	Central Indo-Pacific	1998-04-15	75	8.81	1.98	15.47	0.61	-3.07301	0.952738	0.407663	5.9381	6.66141	7.11916	0	0	1.37741e+09	531.94	2	0.159859	3.64089
-23.7542	151.334	Central Indo-Pacific	2002-03-15	5	12.8	2.08	16.15	0.67	-3.0998	0.995192	0.383045	6.48853	7.06144	7.04438	0	0	1.45604e+09	482.67	2	0.104732	3.63959
-23.9401	151.468	Central Indo-Pacific	1998-04-15	75	8.94	2.13	17.38	0.69	-3.08622	0.999354	0.398346	4	8.4	7.13945	0	0	1.38632e+09	6049.87	1	0.199418	3.63959
-23.534	151.276	Central Indo-Pacific	2002-03-15	75	8.13	1.83	13.75	0.58	-3.06748	0.942032	0.364638	6.42618	6.91278	6.89264	0	0	1.55738e+09	160.85	2	0.123794	3.63959
30.5	131	Temperate Northern Pacific	1998-10-15	75	5.56	1.1	6.88	0.35	-1.72888	3.20878	0.0252525	6.33602	7.41389	7.82906	9.54302e+08	9.54302e+08	4.00247e+10	2002.99	2	0.0519	3.47229
-23.4	151.15	Central Indo-Pacific	1998-04-15	75	11.85	2.03	14.63	0.69	-3.07563	0.988409	0.340012	5.65827	5.48633	6.89264	0	0	1.65663e+09	49.81	0	0.11975	3.67889
-23.349	150.938	Central Indo-Pacific	2002-03-15	75	7.77	2.17	13.75	0.84	-3.10954	1.11038	0.298488	6.48541	6.8537	6.71436	0	0	1.76299e+09	158.42	0	0.242887	3.67889
-23.1536	151.085	Central Indo-Pacific	2002-03-15	75	10.03	1.65	10.08	0.55	-3.03123	0.931439	0.324867	6.48541	6.8537	6.71436	0	0	1.92933e+09	63.61	2	0.0681371	3.67889
-23.1977	151.102	Central Indo-Pacific	2002-03-15	75	11.09	1.76	12.75	0.61	-3.00729	0.887002	0.334783	6.48541	6.8537	6.71436	0	0	1.86497e+09	4487.71	2	0.0739412	3.67889
-23.0362	150.877	Central Indo-Pacific	2002-03-15	75	9.46	1.8	11.81	0.6	-3.03908	0.97816	0.302862	6.51799	6.81068	6.9557	0	0	2.20772e+09	171.27	2	0.101249	3.67889
-23.5635	151.683	Central Indo-Pacific	1998-04-15	75	11.29	1.66	12.86	0.51	-2.88111	0.66421	0.431163	6.33289	6.94041	7.0926	8.36455e+07	8.36455e+07	1.78908e+09	4926.76	0	0.079	3.64089
-23.5039	151.773	Central Indo-Pacific	1998-04-15	75	9.33	1.51	12.61	0.46	-2.79251	0.561117	0.459119	6.33289	6.94041	7.0926	1.04703e+08	1.04703e+08	1.90777e+09	87.1	0	0.0785	3.64089
-23.6006	152.044	Central Indo-Pacific	1998-04-15	30	44.52	12.1	44.95	10.18	-2.69081	0.418786	0.477707	6.41202	7.02019	7.15629	1.27606e+08	1.27606e+08	2.08741e+09	11261.7	0	0.0589025	3.64089
-23.6966	152.183	Central Indo-Pacific	1998-04-15	5	6.89	1.11	8.85	0.32	-2.57266	0.277247	0.482994	6.51167	7.1475	7.28599	1.15566e+08	1.15566e+08	2.09376e+09	16366.1	0	0.0924	3.64089
-26.02	32.9	Western Indo-Pacific	2009-03-15	5	1.16	0.86	7.05	0.31	-2.49528	0.246334	0.570498	7.67825	7.71633	7.60495	0	0	7.95368e+08	653.86	0	0.200616	3.63406
-23.9054	152.408	Central Indo-Pacific	1998-04-15	30	5.76	1.07	8.17	0.3	-2.53163	0.242373	0.489001	6.62131	7.23544	7.38088	1.21722e+08	1.21722e+08	2.0329e+09	1355.08	0	0.0877	3.64089
0.4	-90.4	Tropical Eastern Pacific	1998-05-15	75	30.38	4.85	34.3	1.7	-2.11908	-0.375744	0.851069	3.58532	5.11259	4.96743	0	0	0	5947.88	2	0.0584	3.14805
23.61	119.582	Central Indo-Pacific	1998-06-15	30	0	1.22	7.88	0.42	-1.22719	2.54073	-0.0214405	6.99965	7.10911	7.84969	0	1.15075e+09	4.12553e+10	1418.66	0	0.11895	3.59869
-21.9278	150.102	Central Indo-Pacific	1998-04-15	75	8.73	1.69	11.46	0.57	-2.77905	0.785083	0.150813	5.59344	5.55273	6.63334	2.2873e+07	2.2873e+07	3.25294e+09	553.05	0	0.145314	3.71322
-21.6071	149.782	Central Indo-Pacific	1998-04-15	30	7.85	1.61	9.93	0.58	-2.83812	0.890277	0.0592977	6.08868	6.27608	7.03274	3.56884e+07	3.56884e+07	3.00421e+09	202.62	0	0.119116	3.71322
-21.4833	149.258	Central Indo-Pacific	1998-04-15	75	4.085	3.35	30.125	1.04	-2.82473	0.9649	0.0253101	3.6	8.7	7.19771	3.60572e+07	3.60572e+07	2.4049e+09	1397.96	0	0.163465	3.74379
-22.0056	150.376	Central Indo-Pacific	1998-04-15	75	9.16	1.62	10.69	0.55	-2.67702	0.637043	0.186863	6.40051	6.36427	7.03652	1.88751e+07	1.88751e+07	4.46692e+09	216.99	0	0.0872	3.71322
29.0722	48.4933	Western Indo-Pacific	2000-09-15	75	8.49	2.47	19.31	0.76	-2.88836	4.42223	-2.26309	3.24985	4.49896	4.38065	0	0	0	268.47	0	0.151547	3.62301
-21.45	149.708	Central Indo-Pacific	1998-04-15	75	7.49	1.63	13.86	0.56	-2.76566	0.830043	0.0646624	6.08868	6.27608	7.03274	4.23338e+07	4.23338e+07	3.14682e+09	106.47	0	0.0838449	3.74639
-22.0833	150.667	Central Indo-Pacific	1998-04-15	75	9.11	1.38	10.76	0.45	-2.61449	0.546891	0.232682	6.54226	6.77904	7.13346	1.06828e+08	1.06828e+08	4.74862e+09	283.74	0	0.0744	3.71542
-26.779	32.8998	Western Indo-Pacific	2005-04-15	30	0	0.55	4.36	0.16	-2.23578	-0.12958	0.473995	7.44608	7.66504	7.7786	0	0	9.07201e+08	747.21	2	0.0473	3.61275
-26.9287	32.8858	Western Indo-Pacific	2005-04-15	30	0	1.04	11.53	0.27	-2.23243	-0.133915	0.47276	7.61659	7.87786	7.99241	0	0	8.6853e+08	771.88	2	0.0472	3.61275
-21.4583	149.867	Central Indo-Pacific	1998-04-15	75	7.99	1.56	9.85	0.54	-2.69228	0.717935	0.0898642	6.08868	6.27608	7.03274	4.50706e+07	4.50706e+07	3.48991e+09	226.47	0	0.0796	3.74639
-21.65	150.217	Central Indo-Pacific	1998-04-15	75	8.66	1.57	10.17	0.57	-2.6094	0.560209	0.126822	6.37853	6.60465	7.11406	4.48052e+07	4.48052e+07	4.64232e+09	507.33	0	0.0589	3.71322
-21.9583	150.683	Central Indo-Pacific	1998-04-15	30	9.09	1.59	13.06	0.58	-2.54294	0.481805	0.220775	6.54226	6.77904	7.13346	1.28079e+08	1.28079e+08	4.83372e+09	267.73	0	0.0688	3.71542
-21.6617	150.317	Central Indo-Pacific	1998-04-15	75	10.43	1.61	12.61	0.55	-2.54599	0.481875	0.14453	6.37853	6.60465	7.11406	7.00209e+07	7.00209e+07	5.86951e+09	1007.55	0	0.0664	3.71322
-21.525	150.15	Central Indo-Pacific	1998-04-15	75	7.68	1.23	7.67	0.46	-2.52935	0.496991	0.120828	6.13929	6.56081	7.04015	5.64178e+07	5.64178e+07	4.37588e+09	16.97	2	0.0695	3.71322
-20.9117	149.39	Central Indo-Pacific	1998-04-15	5	4.66	1.26	9.61	0.46	-2.54331	0.66481	0.103841	6.22277	6.57094	7.19031	7.51043e+07	7.51043e+07	4.044e+09	262.22	0	0.0791	3.74379
-21.5205	150.257	Central Indo-Pacific	1998-04-15	30	8.41	1.26	8.4	0.43	-2.47027	0.424433	0.136221	6.13929	6.56081	7.04015	8.09631e+07	8.09631e+07	5.12519e+09	84.66	0	0.0678	3.71322
-20.8159	149.266	Central Indo-Pacific	1998-04-15	30	5.84	1.64	14.24	0.58	-2.52735	0.66095	0.111783	5.74409	5.69863	7.04761	7.90439e+07	7.90439e+07	4.20098e+09	368.05	0	0.0809	3.74379
-20.7366	149.149	Central Indo-Pacific	2002-03-15	75	10.5	1.53	10.5	0.61	-2.52567	0.670163	0.110834	6.25708	6.71836	7.04761	0	0	4.39686e+09	1868.91	0	0.0885	3.74379
-21.0333	149.55	Central Indo-Pacific	1998-04-15	5	3.31	1.26	9.06	0.46	-2.49444	0.570865	0.117461	6.22277	6.57094	7.19031	6.89082e+07	6.89082e+07	3.87257e+09	180.71	2	0.0688	3.74639
-20.6741	149.139	Central Indo-Pacific	2002-03-15	75	6.94	1.56	11.97	0.57	-2.4959	0.626263	0.118651	6.25708	6.71836	7.04761	0	0	4.67797e+09	63.81	0	0.0941	3.74379
-22.0146	152.45	Central Indo-Pacific	2002-03-15	75	4.93	0.96	6.72	0.3	-2.17407	0.0635788	0.385528	6.1564	6.50684	6.93743	0	0	7.68856e+09	126026	0	0.0602419	3.71774
-20.4566	149.048	Central Indo-Pacific	2002-03-15	30	8.55	1.57	9.64	0.57	-2.40974	0.52981	0.146617	6.21341	6.68302	6.78281	0	0	5.92628e+09	45.6	0	0.115832	3.77359
-20.8635	149.596	Central Indo-Pacific	2002-03-15	75	5.53	1.24	8.29	0.46	-2.34646	0.384633	0.150968	6.30818	6.74288	7.12885	0	0	4.51931e+09	128.37	0	0.0629	3.74639
-20.3667	148.95	Central Indo-Pacific	1998-04-15	5	0	1.42	10.8	0.47	-2.35679	0.470798	0.158571	5.50754	5.64597	6.82248	1.81485e+08	1.81485e+08	6.72706e+09	100.98	0	0.1246	3.77359
26.627	127.872	Central Indo-Pacific	2003-07-15	5	0	1.1575	9.8425	0.3025	-0.855274	2.51485	-0.0464905	7.12895	7.33762	7.32228	1.13899e+08	6.74791e+09	9.73545e+10	965.94	0	0.0421	3.57139
-21.0167	149.898	Central Indo-Pacific	2002-03-15	30	0	1.2	6.8	0.44	-2.26657	0.272033	0.157562	6.37185	6.73056	7.01686	0	0	4.72153e+09	942.42	0	0.0608	3.74639
-21.1657	150.662	Central Indo-Pacific	2002-03-15	5	4.27	0.95	6.75	0.29	-2.19486	0.146291	0.230203	6.21655	6.53741	6.84078	0	0	9.05767e+09	116685	0	0.0724	3.74902
23	-109.7	Temperate Northern Pacific	1997-09-15	30	7.38667	1.16	10.9433	0.333333	-1.08319	2.86488	0.13004	5.15221	4.87036	5.26168	0	0	3.0262e+10	1499	2	0.0819	3.21644
-21.1358	150.789	Central Indo-Pacific	2002-03-15	5	7.48	0.9	7.48	0.3	-2.15699	0.100949	0.252726	6.21655	6.53741	6.84078	0	0	8.32616e+09	122596	0	0.069	3.74902
-21.1236	150.481	Central Indo-Pacific	2002-03-15	5	2.77	1.2	7.85	0.43	-2.19758	0.172911	0.205626	6.16891	6.53239	6.82983	0	0	8.74464e+09	119947	0	0.112564	3.74639
-20.7667	149.608	Central Indo-Pacific	1998-04-15	5	6.88	1.29	8.19	0.49	-2.24245	0.267969	0.164193	6.13359	6.53872	7.12885	1.15307e+08	1.15307e+08	4.86829e+09	831.09	0	0.06	3.74639
-20.9608	150.081	Central Indo-Pacific	2002-03-15	30	4.35	1.17	10.03	0.42	-2.18425	0.177133	0.162902	6.37185	6.73056	7.01686	0	0	5.67107e+09	1017.21	0	0.0656	3.74639
-21.5542	152.545	Central Indo-Pacific	2002-03-15	5	3.48	0.75	4.98	0.22	-1.98255	-0.0781173	0.428603	5.92956	6.35456	6.85677	0	0	8.44925e+09	136928	0	0.0608	3.72015
-20.9046	150.623	Central Indo-Pacific	2002-03-15	5	3.49	0.86	6.67	0.27	-2.11362	0.0847478	0.232981	6.16891	6.53239	6.82983	0	0	8.11263e+09	57449.9	0	0.0591	3.74902
-24.6082	35.2685	Western Indo-Pacific	2005-04-15	30	0	0.79	6.94	0.22	-1.92196	-0.322282	0.321976	7.23589	7.28149	7.33731	0	0	2.64298e+09	11478.9	2	0.0805	3.66032
-20.8572	150.38	Central Indo-Pacific	2002-03-15	75	2.8	0.9	6.48	0.3	-2.14518	0.14023	0.19427	6.00785	6.43122	6.77045	0	0	8.4643e+09	33622.9	0	0.066	3.74639
-20.1572	148.932	Central Indo-Pacific	2002-03-15	75	11.46	3.524	16.506	2.494	-2.21091	0.311711	0.15964	6.1625	6.66218	6.82248	0	0	8.90089e+09	329.05	0	0.0686	3.77359
-20.225	149.146	Central Indo-Pacific	1998-04-15	30	37.19	12.13	42.3	10.52	-2.16738	0.235211	0.191013	5.88479	6.36897	6.97871	3.5477e+08	3.5477e+08	7.84079e+09	375.14	2	0.07	3.77359
-20.2	149.113	Central Indo-Pacific	1998-04-15	75	36.38	12.13	43.41	10.51	-2.16738	0.235211	0.191013	5.50754	5.64597	6.82248	3.57962e+08	3.57962e+08	8.08378e+09	4185.64	1	0.0675	3.77359
-21.5738	152.008	Central Indo-Pacific	2002-03-15	5	2.42	0.61	3.82	0.19	-1.9463	-0.110946	0.431374	5.93093	6.33526	6.80253	0	0	1.0051e+10	82701.6	0	0.0494	3.71774
-20.6804	150.229	Central Indo-Pacific	2002-03-15	5	37.83	11.17	43.14	9.57	-2.10241	0.098446	0.209126	6.11452	6.53351	6.84821	0	0	7.55721e+09	34261	0	0.0703	3.74639
-20.7171	150.47	Central Indo-Pacific	2002-03-15	5	40.45	11.18	40.71	9.58	-2.08033	0.0634101	0.225531	6.00785	6.43122	6.77045	0	0	1.00531e+10	136569	0	0.0695	3.74639
-20.684	150.447	Central Indo-Pacific	2002-03-15	30	2.31	0.82	6.26	0.25	-2.07196	0.0516186	0.231597	6.00785	6.43122	6.77045	0	0	9.86721e+09	87781.3	0	0.0834	3.74639
-20.7693	151.044	Central Indo-Pacific	1998-02-15	30	0	0.6	3.86	0.18	-1.97812	-0.0809593	0.350125	5.52167	6.74544	6.73728	4.71413e+08	1.12786e+09	1.25471e+10	103029	0	0.175796	3.74902
-20.627	150.803	Central Indo-Pacific	2002-03-15	5	1	0.61	4.03	0.16	-1.99403	-0.0509882	0.320648	5.90769	6.34247	6.73369	0	0	1.33925e+10	169811	0	0.124943	3.74902
-21.4638	152.521	Central Indo-Pacific	2002-03-15	5	5.34	0.83	6.4	0.26	-1.9225	-0.109516	0.430921	5.92956	6.35456	6.85677	0	0	8.44407e+09	212515	2	0.0709	3.75464
-20.471	150.29	Central Indo-Pacific	2002-03-15	5	5.5	0.79	5.5	0.27	-2.05069	0.0391228	0.246853	5.94551	6.4274	6.78516	0	0	8.74053e+09	57931.3	0	0.0983	3.77661
-20.1007	148.316	Central Indo-Pacific	2002-03-15	75	1.01	1.91	15.01	0.68	-2.21164	0.414407	0.117669	5.80229	6.70387	7.29899	0	0	6.46858e+09	179.84	0	0.160063	3.77067
-20.0643	148.266	Central Indo-Pacific	2002-03-15	75	2.01	1.67	12.91	0.52	-2.20657	0.411988	0.11379	5.80229	6.70387	7.29899	0	0	6.45822e+09	515.26	0	0.122917	3.77067
-21.0617	-175.341	Eastern Indo-Pacific	2000-02-15	75	3.02	1.05	7.38	0.38	-1.77516	-0.4866	0.39589	7.1792	7.13941	7.08813	0	0	7.78275e+09	1016.98	2	0.0398516	3.91919
-20.0188	148.624	Central Indo-Pacific	2002-03-15	75	8.77	1.36	8.77	0.49	-2.17323	0.318533	0.121464	5.78333	6.62392	6.42187	0	0	8.30343e+09	176.39	0	0.076	3.77359
-20.3508	150.069	Central Indo-Pacific	2002-03-15	75	2.83	0.97	9.31	0.3	-2.05969	0.0772826	0.212812	5.88663	6.41477	6.81579	0	0	8.13243e+09	65030.2	0	0.0773	3.77661
-20.3503	150.097	Central Indo-Pacific	2002-03-15	75	2.83	0.97	9.31	0.3	-2.05969	0.0772826	0.212812	5.88663	6.41477	6.81579	0	0	8.2457e+09	67195.6	0	0.0788	3.77661
-19.967	148.267	Central Indo-Pacific	2002-03-15	75	10.41	1.44	10.4	0.55	-2.18347	0.387464	0.108415	5.80229	6.70387	7.29899	0	0	6.67228e+09	1262.05	1	0.0916	3.77067
23.4303	-109.385	Temperate Northern Pacific	1997-08-15	30	4.04	0.76	5.04	0.24	-1.06786	2.8882	-0.32672	3.48988	4.46928	4.76737	0	1.58579e+09	2.61191e+10	4268.63	0	0.077	3.23625
-19.8551	147.895	Central Indo-Pacific	1998-04-15	75	5.83	1.52	9.44	0.62	-2.14948	0.371535	0.0981523	5.0903	6.23034	7.15998	3.24372e+08	3.24372e+08	5.83958e+09	453.85	0	0.119948	3.77067
-20.193	150.082	Central Indo-Pacific	2002-03-15	75	2.86	0.83	7.75	0.24	-1.9799	-0.0177621	0.246365	5.88663	6.41477	6.81579	0	0	9.54963e+09	131475	0	0.0743	3.77661
-21.3579	152.481	Central Indo-Pacific	2002-03-15	30	4.67	0.8	6.73	0.24	-1.84525	-0.154248	0.433547	5.9537	6.4078	6.94511	0	0	8.43327e+09	215383	0	0.0673	3.75179
-20.1312	149.94	Central Indo-Pacific	2002-03-15	5	5	0.93	7.41	0.28	-1.98732	0.00414129	0.227814	5.88663	6.41477	6.81579	0	0	9.72154e+09	87623.6	0	0.087	3.77661
-20.1006	149.928	Central Indo-Pacific	2002-03-15	5	2.46	0.79	5.34	0.25	-1.98732	0.00414129	0.227814	5.7615	6.35655	6.84322	0	0	1.002e+10	87040.1	0	0.0891	3.77661
-20.4433	57.7084	Western Indo-Pacific	2004-03-15	30	2.56	0.9	6.48	0.25	-1.82691	-0.440108	0.142803	7.29692	8.06167	7.79785	1.0442e+09	1.0442e+09	2.49905e+10	39.7	0	0.041	3.72751
-20.3257	57.782	Western Indo-Pacific	2004-03-15	30	3.05	1.08	8.15	0.26	-1.81749	-0.447857	0.142682	7.23772	8.01598	7.76471	1.08465e+09	1.08465e+09	2.61435e+10	1120.46	0	0.185553	3.72751
-20.0341	149.95	Central Indo-Pacific	2002-03-15	5	3.15	0.81	6.29	0.24	-1.96157	-0.0278626	0.241887	5.7615	6.35655	6.84322	0	0	1.08007e+10	91115.6	0	0.077	3.77661
-20.2483	57.795	Western Indo-Pacific	1998-04-15	5	2.35	0.99	6.93	0.24	-1.80917	-0.453167	0.132461	7.16636	7.7993	7.76471	1.20158e+09	1.20158e+09	2.68289e+10	40.01	0	0.0316	3.72751
-19.7	147.817	Central Indo-Pacific	2002-03-15	75	8.16	1.34	8.15	0.54	-2.11183	0.344683	0.0950002	5.86168	6.72947	7.2119	0	0	5.925e+09	1089.78	2	0.0869	3.77067
-20.1417	150.445	Central Indo-Pacific	2002-03-15	5	1.4	0.65	6.35	0.16	-1.86278	-0.166581	0.330523	5.73662	6.30074	6.78236	0	0	1.36281e+10	139662	0	0.108211	3.77661
-21.2015	152.099	Central Indo-Pacific	2002-03-15	5	3.93	0.67	4.32	0.21	-1.77433	-0.236845	0.442305	5.86169	6.30923	6.80616	0	0	8.46618e+09	195760	2	0.0519	3.75179
-19.8464	149.896	Central Indo-Pacific	2002-03-15	5	2.15	0.72	7.01	0.22	-1.89278	-0.0909461	0.271392	5.71342	6.37392	6.96196	0	0	1.33129e+10	94364	0	0.0837	3.77661
-19.979	57.668	Western Indo-Pacific	2004-05-15	30	0	0.76	6.32	0.2	-1.78025	-0.472937	0.111461	7.65342	8.14929	7.75538	1.01558e+09	1.01558e+09	2.89183e+10	2427.2	2	0.0333	3.72751
-19.728	148.364	Central Indo-Pacific	2002-03-15	30	4.55	1.31	7.52	0.49	-1.99911	0.152762	0.153797	5.7579	6.59838	6.78981	0	0	6.77166e+09	71.75	2	0.0635	3.77067
-19.7141	149.37	Central Indo-Pacific	1998-04-15	75	2.17	0.87	7.95	0.26	-1.91134	-0.00354775	0.242761	5.84341	6.46844	6.94644	7.37473e+08	7.37473e+08	1.39762e+10	57331.2	0	0.163032	3.77359
-19.8024	149.201	Central Indo-Pacific	1998-04-15	5	4.37	1.02	7.35	0.38	-1.93281	0.0339793	0.219938	5.84341	6.46844	6.94644	6.30563e+08	6.30563e+08	1.24397e+10	37883.9	0	0.161365	3.77359
-21.2034	152.523	Central Indo-Pacific	2002-03-15	30	7.21	0.72	7.2	0.2	-1.75472	-0.225107	0.435582	5.9537	6.4078	6.94511	3.34516e+06	3.34516e+06	8.42585e+09	228892	0	0.0671	3.75464
-19.818	149.119	Central Indo-Pacific	1998-04-15	5	1.76	0.81	6.6	0.27	-1.92252	0.0311252	0.218382	5.90667	6.52393	7.0114	6.02172e+08	6.02172e+08	1.07034e+10	31543.5	0	0.0776	3.77359
-21.1612	152.15	Central Indo-Pacific	2002-03-15	5	1.04	0.61	5.98	0.16	-1.73854	-0.252326	0.436394	5.87874	6.33381	6.85552	0	0	8.33451e+09	202688	0	0.048108	3.75179
-19.68	149.19	Central Indo-Pacific	2002-03-15	75	3.57	0.81	7.32	0.26	-1.89678	-0.00104094	0.239736	5.78198	6.44247	6.94644	0	0	1.33188e+10	48474.2	0	0.0776	3.77359
-20.466	57.329	Western Indo-Pacific	2004-05-15	30	0	0.896	6.478	0.252	-1.75759	-0.478776	0.0762263	7.98127	8.24628	7.73501	6.23001e+08	6.23001e+08	2.46772e+10	649.91	0	0.0364	3.72836
-23.7777	35.5117	Western Indo-Pacific	2005-04-15	75	0	0.98	9.13	0.27	-1.7285	-0.406354	0.279858	7.13508	7.06922	7.18558	0	0	3.94356e+09	1099.85	2	0.069	3.68128
-20.0885	57.5122	Western Indo-Pacific	2004-03-15	30	2.45333	0.61	4.93667	0.15	-1.73363	-0.49876	0.0689527	7.13245	7.87068	7.42847	8.3013e+08	8.36983e+08	2.76731e+10	125.75	0	0.0324	3.72751
-21.1023	152.354	Central Indo-Pacific	2002-03-15	30	2.64	0.71	4.23	0.25	-1.69128	-0.271417	0.440858	5.96333	6.4438	6.99663	0	0	8.29365e+09	222570	0	0.0462	3.75179
-19.6118	149.635	Central Indo-Pacific	2002-03-15	5	1.05	0.82	6.51	0.24	-1.77251	-0.160837	0.32003	5.69208	6.41451	7.07738	0	0	1.57193e+10	86114.7	0	0.0742	3.77661
-19.6313	149.67	Central Indo-Pacific	2002-03-15	5	0	0.73	5.67	0.18	-1.75995	-0.177461	0.324683	5.72087	6.37006	6.92936	0	0	1.58245e+10	87453.9	0	0.0757	3.77661
-19.4657	149.173	Central Indo-Pacific	2002-03-15	5	0	0.66	4.96	0.16	-1.80149	-0.10558	0.277185	5.66783	6.41728	7.04201	0	0	1.10648e+10	69438.2	0	0.0847	3.79999
-19.4922	148.9	Central Indo-Pacific	2002-03-15	5	0	0.92	9.52	0.23	-1.81486	-0.0698699	0.264345	5.67134	6.45299	7.07037	0	0	9.4414e+09	70718.9	0	0.0916	3.79999
-19.5236	149.378	Central Indo-Pacific	2002-03-15	30	0	0.77	6.96	0.2	-1.78413	-0.136191	0.285124	5.67884	6.40538	7.04406	0	0	1.35631e+10	73851	2	0.0637	3.77359
-21.0516	152.209	Central Indo-Pacific	2002-03-15	30	6.77	0.85	6.98	0.21	-1.67556	-0.285727	0.430101	5.96333	6.4438	6.99663	0	0	8.31157e+09	214463	0	0.054	3.75179
-19.6652	149.927	Central Indo-Pacific	2002-03-15	5	1.34	0.92	9	0.21	-1.73587	-0.223503	0.326509	5.71342	6.37392	6.96196	0	0	1.67527e+10	109922	2	0.0632	3.77661
-19.4378	148.853	Central Indo-Pacific	2002-03-15	5	0	0.82	6.84	0.22	-1.80151	-0.0789829	0.270887	5.69016	6.49709	7.10712	0	0	9.24872e+09	60778.5	0	0.0938	3.79999
-21.085	152.502	Central Indo-Pacific	2002-03-15	5	3.66	0.63	5.01	0.18	-1.65543	-0.298652	0.437188	6.05945	6.53826	7.09667	5.72593e+06	5.72593e+06	8.49192e+09	235443	2	0.0577	3.75464
-19.3605	148.636	Central Indo-Pacific	1998-04-15	30	0	1.02	9.46	0.29	-1.80894	-0.0573194	0.24766	6.21482	6.77591	7.16407	7.65731e+08	7.65731e+08	8.77569e+09	70373.1	0	0.0777	3.79999
-19.6164	149.85	Central Indo-Pacific	2002-03-15	5	0	1.12	12.51	0.27	-1.71991	-0.225071	0.329073	5.69208	6.41451	7.07738	0	0	1.45178e+10	105106	0	0.0638	3.77661
-19.6934	149.978	Central Indo-Pacific	2002-03-15	5	0	0.89	7.02	0.21	-1.71173	-0.245572	0.33328	5.71342	6.37392	6.96196	0	0	1.64758e+10	110470	0	0.0739	3.77661
-19.2562	148.629	Central Indo-Pacific	2002-03-15	30	0	0.78	5.57	0.24	-1.76132	-0.11023	0.273597	5.63468	6.47942	7.16407	0	0	8.94281e+09	81377.7	0	0.0687	3.79999
-21.0027	152.474	Central Indo-Pacific	2002-03-15	30	5.76	0.97	6.33	0.35	-1.62752	-0.314596	0.433594	6.05945	6.53826	7.09667	5.74469e+06	5.74469e+06	8.62422e+09	238898	0	0.0456	3.75179
-23.1135	35.5715	Western Indo-Pacific	2005-04-15	30	0	1.12	11.55	0.26	-1.62963	-0.481266	0.25868	7.36122	7.12293	7.15466	0	0	5.79612e+09	6459.07	2	0.0644	3.69791
-19.7833	-174.45	Eastern Indo-Pacific	2000-03-15	5	3.7	1.08	6.61	0.37	-1.52	-0.672191	0.339005	6.46216	6.9049	6.98984	6.61117e+08	6.61117e+08	7.8123e+09	7983.72	0	0.0419	3.96542
-19.3687	148.336	Central Indo-Pacific	1998-04-15	5	2.81	1.08	8.32	0.37	-1.79993	-0.0375198	0.216431	6.2031	6.72358	7.1511	6.32886e+08	6.32886e+08	7.89103e+09	39247.4	0	0.0581966	3.7967
-18.9638	146.631	Central Indo-Pacific	2002-03-15	5	1.3	1.4	8.53	0.56	-2.00298	0.398304	-0.0368974	5.33486	6.28899	6.06155	0	0	4.83204e+09	113.12	0	0.113761	3.79346
-19.0996	146.56	Central Indo-Pacific	1998-04-15	75	6.67	1.48	7.28	0.63	-2.01166	0.43958	-0.0512675	9.2	5.9	7.236	1.99363e+08	1.99363e+08	4.6442e+09	2857.66	0	0.192216	3.79346
-19.3839	148.088	Central Indo-Pacific	2002-03-15	75	0	1.12	8.6	0.37	-1.78878	-0.0325878	0.22566	5.77262	6.61815	7.08938	0	0	6.66467e+09	45536.4	0	0.0777	3.7967
-19.2092	148.542	Central Indo-Pacific	2002-03-15	30	1.26	0.91	9.56	0.24	-1.74869	-0.11502	0.265473	5.65315	6.50174	7.15244	0	0	8.79168e+09	85134.8	0	0.0722	3.79999
-20.9855	152.395	Central Indo-Pacific	2002-03-15	30	6.94	1.03	6.93	0.35	-1.60745	-0.325553	0.425142	6.05945	6.53826	7.09667	3.30661e+06	3.30661e+06	8.53675e+09	233764	0	0.0422	3.75179
-17.7	-39.1	Tropical Atlantic	1994-03-15	75	1.6	1.25	13.13	0.44	-1.37984	-0.81422	0.546151	6.22934	6.0966	6.18645	0	0	2.1598e+08	3906.67	0	0.259358	3.96834
-18.6587	146.485	Central Indo-Pacific	1998-02-15	75	6.11	1.46	10.3	0.57	-1.93155	0.261499	0.00818852	3.55139	3.87089	6.35529	3.02454e+08	1.48604e+09	5.44334e+09	417.08	0	0.0832	3.79029
-17.785	-39	Tropical Atlantic	1998-04-15	75	2.84	0.69	7.36	0.21	-1.35664	-0.853786	0.546091	5.63208	6.052	6.18645	0	0	2.25799e+08	17832.9	1	0.140381	3.96834
-18.6966	146.598	Central Indo-Pacific	1998-04-15	75	39.66	13.82	52.54	12.54	-1.90177	0.203821	0.0495672	4.25216	4.00529	6.35529	3.42193e+08	3.42193e+08	5.46676e+09	108.08	2	0.0583	3.79346
-19.1766	148.383	Central Indo-Pacific	1998-04-15	5	3.74	0.83	6.4	0.21	-1.7392	-0.107152	0.256717	6.19919	6.74075	7.15244	8.17263e+08	8.17263e+08	8.30908e+09	83282.4	0	0.0987733	3.7967
-19.2105	148.173	Central Indo-Pacific	1998-04-15	30	6.07	0.96	7.93	0.28	-1.74381	-0.0851654	0.242123	6.2031	6.72358	7.1511	6.82025e+08	6.82025e+08	7.45533e+09	59819.7	0	0.0837	3.7967
-18.814	146.432	Central Indo-Pacific	1998-04-15	75	8.17	1.83	18.1	0.68	-1.96645	0.351652	-0.05393	4.25216	4.00529	6.35529	2.59998e+08	2.59998e+08	5.0093e+09	10799.1	0	0.146629	3.79029
-19.298	148.079	Central Indo-Pacific	2002-03-15	75	5.1	1.15	8.97	0.36	-1.75037	-0.0694501	0.232794	5.71892	6.56734	7.14375	0	0	6.90992e+09	52976.2	0	0.0746	3.7967
-17.6667	-38.5	Tropical Atlantic	1998-04-15	75	5.56	0.97	7.84	0.25	-1.28465	-0.98105	0.399734	5.52391	5.89099	6.10178	0	0	1.68713e+08	38924.4	2	0.0583	3.97454
-19.2152	148.903	Central Indo-Pacific	2002-03-15	75	4.42	0.83	6.79	0.25	-1.63888	-0.229091	0.313132	5.64043	6.46931	7.17079	0	0	9.72307e+09	96083.6	0	0.0557	3.79999
-19.0214	148.325	Central Indo-Pacific	2002-03-15	75	1.04	0.9	6.26	0.28	-1.62759	-0.207106	0.272007	5.63148	6.51245	7.19298	0	0	8.20285e+09	77683.6	2	0.0531885	3.7967
-18.9103	147.745	Central Indo-Pacific	2002-03-15	30	1.29	0.81	6.1	0.24	-1.66146	-0.151313	0.220375	5.61677	6.50911	7.11222	0	0	6.76822e+09	56790.8	0	0.0743	3.7967
-18.69	147.1	Central Indo-Pacific	1998-04-15	30	4.31	1.1	10.23	0.35	-1.69364	-0.0858963	0.178027	5.63961	6.28258	6.86632	5.86093e+08	5.86093e+08	6.13899e+09	43458.7	0	0.0546	3.79346
-18.4	146.7	Central Indo-Pacific	1998-04-15	30	5.78	1.3	9.67	0.43	-1.7152	-0.0284275	0.146514	5.48035	6.18281	6.77489	5.41572e+08	5.41572e+08	6.54118e+09	26418.5	0	0.103912	3.81594
-19.7211	-175.102	Eastern Indo-Pacific	2000-02-15	75	2.44	0.96	5.91	0.36	-1.42071	-0.722118	0.286641	7.05811	6.96333	7.02192	0	0	6.93484e+09	501.89	0	0.0309	3.95961
-18.9513	148.081	Central Indo-Pacific	2002-03-15	75	2.81	0.82	4.63	0.27	-1.61072	-0.226451	0.258962	5.63787	6.52093	7.16402	0	0	7.63383e+09	80356.7	0	0.0552	3.7967
-18.237	146.323	Central Indo-Pacific	1998-04-15	30	9.54	1.44	12.68	0.53	-1.7946	0.153001	0.0353383	4.41981	4.79296	6.36262	3.90007e+08	3.90007e+08	7.27046e+09	243.51	1	0.0891	3.81248
-18.4	146.833	Central Indo-Pacific	1998-04-15	30	3.45	1.07	7.34	0.36	-1.67668	-0.083319	0.170681	5.48035	6.18281	6.77489	5.81488e+08	5.81488e+08	6.55897e+09	38426	0	0.0791	3.81594
-18.8572	147.892	Central Indo-Pacific	1998-04-15	5	2.56	0.87	8.86	0.23	-1.60998	-0.225506	0.237204	6.19576	6.79411	7.20817	8.19532e+08	8.19532e+08	7.22672e+09	71502.3	0	0.0605	3.7967
-18.1732	146.153	Central Indo-Pacific	1998-04-15	5	7.24	1.66	10.6	0.66	-1.81412	0.22522	-0.0136901	4.41981	4.79296	6.36262	3.13152e+08	3.13152e+08	7.83574e+09	236.35	0	0.225012	3.81248
-17.9559	146.152	Central Indo-Pacific	1998-04-15	75	3.14	1.22	7.88	0.48	-1.78953	0.173529	0.0153579	3.86588	3.69995	5.76386	4.32985e+08	4.32985e+08	9.36529e+09	271.77	0	0.110931	3.81248
24.7	125.4	Central Indo-Pacific	2001-08-15	5	1.4	1.12	10.34	0.36	-0.254281	2.01041	-0.26306	6.50331	7.53752	7.61479	9.35758e+08	9.55341e+09	1.03746e+11	3149.71	2	0.0298	3.60966
-18.7767	147.874	Central Indo-Pacific	1998-04-15	5	3.62	0.95	9.46	0.28	-1.56233	-0.279449	0.237365	6.08751	6.70003	7.12814	8.56906e+08	8.56906e+08	7.33643e+09	76786	0	0.0525	3.7967
-17.675	146.167	Central Indo-Pacific	1998-04-15	75	10.45	1.45	11.44	0.52	-1.71238	0.0615148	0.0754713	4.53703	4.63479	6.03413	6.37873e+08	6.37873e+08	9.72646e+09	79.6	0	0.137999	3.81248
-18.0833	146.567	Central Indo-Pacific	1998-04-15	75	4.91	1.43	10.18	0.59	-1.64434	-0.0832825	0.149547	5.30977	6.06052	6.53257	6.15874e+08	6.15874e+08	7.28583e+09	32647.3	0	0.0957	3.81594
-18.7301	147.844	Central Indo-Pacific	1998-04-15	5	4.21	1.09	8.98	0.37	-1.55167	-0.287385	0.234185	6.08751	6.70003	7.12814	8.69896e+08	8.69896e+08	7.36713e+09	78932.9	0	0.0521	3.7967
-17.7232	146.396	Central Indo-Pacific	2002-03-15	5	0	1.28	8.78	0.46	-1.64944	-0.0500052	0.128775	5.05106	6.06416	6.60609	0	0	8.72612e+09	27431.9	0	0.0892677	3.81248
-17.8491	146.487	Central Indo-Pacific	1998-04-15	30	6.98	1.27	7.56	0.53	-1.62802	-0.0922849	0.139976	5.52676	6.22521	6.60609	7.01005e+08	7.01005e+08	8.07813e+09	35216.6	0	0.0783	3.81248
-17.2105	146.077	Central Indo-Pacific	2002-03-15	5	0	1.35	8.56	0.53	-1.6258	-0.035018	0.128441	4.97032	6.14706	6.63515	0	0	8.23408e+09	108.2	0	0.0955	3.83167
-17.8847	146.594	Central Indo-Pacific	1998-02-15	75	4.69	1.41	10.81	0.55	-1.58893	-0.147102	0.161972	4.80445	6.25675	6.53257	6.71197e+08	2.06519e+09	7.738e+09	44941	0	0.0974	3.81594
20.2646	58.4244	Western Indo-Pacific	1998-08-15	30	1.1	1.63	17.04	0.38	0.0332963	-0.0512175	0.1736	6.15879	5.47388	5.7267	0	0	1.78088e+09	9525.32	1	0.580423	3.59176
24.3833	124.267	Central Indo-Pacific	1998-07-15	75	0	1.26	9.59	0.34	-0.168315	1.90231	-0.293812	6.88619	7.58119	7.66954	1.15188e+08	1.64819e+09	9.17188e+10	1355.25	2	0.0328	3.62713
-16.7307	145.685	Central Indo-Pacific	1998-04-15	75	6.98	1.65	13.97	0.6	-1.6222	0.0083092	0.10978	4.9385	5.74646	6.9308	7.60652e+08	7.60652e+08	7.35284e+09	500.92	0	0.155401	3.83167
-16.8982	145.957	Central Indo-Pacific	2002-03-15	75	0	1.05	6.63	0.43	-1.56265	-0.0817227	0.159612	5.03093	6.25722	6.74689	0	0	7.79156e+09	115.39	0	0.0968	3.83167
-18.508	147.54	Central Indo-Pacific	2002-03-15	5	7.07	1.24	7.34	0.41	-1.48182	-0.30578	0.242338	5.39093	6.37486	7.04098	0	0	7.17851e+09	93471.7	0	0.058	3.7967
-17.6925	146.572	Central Indo-Pacific	2002-03-15	30	1.53	1.27	8.76	0.49	-1.52316	-0.21807	0.183483	5.05106	6.06416	6.60609	0	0	8.70724e+09	45130.1	2	0.089	3.81594
-18.2101	147.027	Central Indo-Pacific	2002-03-15	5	4.18	1.12	8.17	0.38	-1.48541	-0.278203	0.231706	5.21429	6.22509	6.84006	0	0	6.97586e+09	68636.8	2	0.0523	3.81594
-17.4	146.4	Central Indo-Pacific	1998-04-15	75	6.82	1.17	8.77	0.44	-1.53564	-0.171589	0.165807	5.5893	6.31027	6.70387	9.28415e+08	9.28415e+08	9.30632e+09	35402.9	0	0.144663	3.83167
-16.3029	145.498	Central Indo-Pacific	1998-04-15	30	3.1	1.17	7	0.48	-1.57347	-0.0494472	0.113602	4.72999	4.85428	7.00482	8.30321e+08	8.30321e+08	7.31046e+09	356.11	0	0.149099	3.84427
-18.3586	147.205	Central Indo-Pacific	2002-03-15	30	0	1.07	7.73	0.35	-1.46708	-0.302173	0.230724	5.27784	6.29579	6.94768	0	0	6.82536e+09	68964.8	2	0.0423	3.81594
-17.9458	146.795	Central Indo-Pacific	1998-04-15	30	3.46	1.24	10.78	0.4	-1.48019	-0.27501	0.215155	5.60868	6.28053	6.71582	8.11778e+08	8.11778e+08	7.49204e+09	65641.8	0	0.0499	3.81594
-16.6745	145.939	Central Indo-Pacific	1998-04-15	5	5.26	1.45	15.23	0.53	-1.52331	-0.121459	0.171826	4.95475	5.18873	6.6328	9.63223e+08	9.63223e+08	7.50606e+09	21112.2	0	0.0678	3.83167
-18.137	146.971	Central Indo-Pacific	1998-04-15	5	0	1.1	8.17	0.33	-1.46331	-0.293138	0.235027	5.72255	6.36137	6.84006	7.92084e+08	7.92084e+08	7.10213e+09	66929.8	2	0.0447	3.81594
-18.42	147.35	Central Indo-Pacific	1998-04-15	5	3.65	1.11	7.13	0.36	-1.45939	-0.3069	0.231155	5.80371	6.44632	6.93626	8.38007e+08	8.38007e+08	6.92028e+09	91270	0	0.0462	3.81594
-16.9522	146.19	Central Indo-Pacific	2002-04-15	30	0	1.05	7.42	0.36	-1.49263	-0.192059	0.190028	5.86742	6.29865	6.87945	0	0	8.01096e+09	19969.3	0	0.070867	3.83167
-16.2467	145.485	Central Indo-Pacific	1998-04-15	75	4.64	1.18	11.91	0.4	-1.54524	-0.090277	0.123468	4.72999	4.85428	7.00482	8.61568e+08	8.61568e+08	7.37925e+09	415.48	2	0.0912	3.84427
-16.4137	145.767	Central Indo-Pacific	2002-03-15	5	0	1.67	10.21	0.75	-1.51064	-0.132043	0.15921	5.10078	6.47951	6.64949	0	0	7.61507e+09	25125.8	0	0.0842	3.84805
-14.6845	144.953	Central Indo-Pacific	2002-03-15	75	4.27	1.23	8.86	0.45	-1.53658	-0.111286	0.124399	5.95509	7.64932	8.06865	0	0	9.75277e+09	61.28	0	0.160477	3.85788
-17.4307	146.545	Central Indo-Pacific	2002-03-15	30	0	1.11	8.05	0.42	-1.47356	-0.252117	0.190853	5.08326	6.12273	6.70387	0	0	9.7931e+09	50009.7	0	0.0659	3.83538
-14.4255	144.811	Central Indo-Pacific	2002-03-15	5	0	1.09	10.86	0.32	-1.5125	-0.159093	0.139341	5.85407	7.71291	8.02753	0	0	9.35499e+09	149.92	0	0.0833	3.86897
-14.8162	145.182	Central Indo-Pacific	2002-03-15	75	0	1.56	12.53	0.55	-1.52235	-0.120458	0.131144	5.81501	7.46899	7.85061	0	0	1.21921e+10	2949.75	0	0.164821	3.85788
-14.4262	144.891	Central Indo-Pacific	2002-03-15	5	1.07	1.4	9.53	0.52	-1.50326	-0.173183	0.146968	5.84676	7.55653	7.44842	0	0	9.88846e+09	799.81	0	0.0847	3.86897
-14.7202	145.162	Central Indo-Pacific	2002-03-15	75	0	0.86	8.51	0.25	-1.5144	-0.131563	0.137793	5.81501	7.46899	7.85061	0	0	1.25369e+10	2746.97	0	0.114025	3.85788
-23.3833	43.7167	Western Indo-Pacific	2001-02-15	75	0.496667	2.04333	16.76	0.75	-1.54028	-0.414836	-0.0973091	7.48841	7.7115	7.01905	0	6.70796e+07	7.83431e+09	6739.31	0	0.215303	3.69979
-14.3603	144.758	Central Indo-Pacific	2002-03-15	5	0	1.32	10.8	0.46	-1.50562	-0.168578	0.139209	5.83206	7.62721	7.49365	0	0	9.17629e+09	11540.9	0	0.0708	3.86897
-14.4952	144.968	Central Indo-Pacific	2002-03-15	5	2.25	1.41	9.72	0.53	-1.49296	-0.18394	0.153394	5.84676	7.55653	7.44842	0	0	1.04512e+10	141.9	0	0.136898	3.86897
-17.1952	146.368	Central Indo-Pacific	2002-03-15	75	0	0.9	4.93	0.35	-1.45802	-0.25164	0.19309	5.08091	6.19097	6.64578	0	0	8.71706e+09	29177	0	0.0541	3.83167
-16.7012	146.051	Central Indo-Pacific	1998-04-15	5	2.8	1.31	10.85	0.54	-1.45017	-0.224891	0.209968	4.95475	5.18873	6.6328	1.05496e+09	1.05496e+09	7.59346e+09	22425.9	0	0.066	3.83167
-15.1604	145.267	Central Indo-Pacific	1998-04-15	75	1.18	1.97	16.33	0.65	-1.51532	-0.151675	0.120678	5.8	8.8	7.733	1.33135e+09	1.33135e+09	9.35343e+09	3013.84	0	0.206324	3.85788
-15.1398	145.316	Central Indo-Pacific	1998-04-15	75	0	1.79	15.64	0.61	-1.50853	-0.163095	0.127694	5.8	8.8	7.733	1.41494e+09	1.41494e+09	9.47069e+09	7829.7	1	0.190311	3.85788
-16.1935	145.696	Central Indo-Pacific	2002-03-15	30	0	1.18	8.21	0.45	-1.48064	-0.184096	0.161679	5.17594	6.58747	6.99669	0	0	7.62022e+09	23618.5	0	0.0961	3.84805
-14.4143	144.95	Central Indo-Pacific	2002-03-15	75	1.04	1.27	9.78	0.48	-1.4707	-0.216358	0.165234	5.84676	7.55653	7.44842	0	0	1.03892e+10	5257.15	0	0.136542	3.86897
-16.0117	50.1637	Western Indo-Pacific	2005-04-15	75	2.42	1.38	11.09	0.51	-1.40949	-0.663189	-0.0157217	5.79599	6.54633	6.68335	1.22147e+07	1.22147e+07	2.45371e+10	1420.24	2	0.081	3.76322
-15.4142	145.43	Central Indo-Pacific	1998-04-15	5	1.02	1.28	12.19	0.4	-1.50003	-0.177608	0.123723	5.73035	6.63095	7.43215	1.32289e+09	1.32289e+09	8.37204e+09	15864.1	0	0.0643	3.85788
-17.3098	146.544	Central Indo-Pacific	2002-03-15	75	1.05	1	6.1	0.37	-1.43398	-0.291127	0.203188	5.14797	6.23547	6.84667	0	0	9.35406e+09	50983.4	2	0.0494	3.83538
-19.0501	178.28	Central Indo-Pacific	2001-02-15	5	0	1.29	10.03	0.44	-1.26515	-0.837466	0.155192	6.38275	6.83817	7.18485	0	3.74491e+08	9.56414e+09	3771.87	2	0.0574	3.94811
-15.711	145.394	Central Indo-Pacific	1998-04-15	75	3.38	1.44	9.82	0.56	-1.50603	-0.149459	0.118582	5.00078	4.88571	7.3153	1.06261e+09	1.06261e+09	7.87841e+09	3663.12	0	0.0928	3.84427
26.127	50.679	Western Indo-Pacific	1996-09-15	75	16.45	2.74	19.87	1.03	-1.82924	3.63852	-2.61557	4.50835	5.02227	4.93374	0	0	0	3424.3	0	0.179377	3.63574
-15.937	145.395	Central Indo-Pacific	1998-04-15	30	1.06	0.93	5.96	0.28	-1.50106	-0.145739	0.119593	4.83911	4.95779	7.15175	9.49126e+08	9.49126e+08	7.74732e+09	315.08	2	0.0938	3.84427
-14.711	145.379	Central Indo-Pacific	2002-03-15	5	0	1.21	11.53	0.43	-1.44521	-0.247037	0.177133	5.84213	7.42794	7.8616	0	0	1.39626e+10	20883.7	0	0.0636	3.85788
-15.8833	50.3	Western Indo-Pacific	1998-05-15	30	1.44	1.6	17.17	0.54	-1.37476	-0.715495	-0.0297225	5.89265	6.36351	6.68335	0	0	2.5513e+10	990.48	0	0.0715	3.76322
25.918	50.697	Western Indo-Pacific	1996-09-15	75	19.05	2.93	21.05	1.07	-1.83765	3.64028	-2.64614	4.44601	4.86857	4.82898	0	0	0	8602.97	0	0.230597	3.63574
26.15	50.7008	Western Indo-Pacific	1998-08-15	75	8.09	2.74	19.87	1.03	-1.82202	3.6348	-2.62681	4.8052	5.06409	4.93374	0	0	0	3856.47	0	0.179377	3.63574
-14.8957	145.479	Central Indo-Pacific	2002-03-15	5	0	1.22	10.14	0.38	-1.41683	-0.295697	0.183129	5.73972	7.32775	7.78012	0	0	1.22237e+10	14265.2	0	0.0731	3.85788
27.2616	-78.3844	Tropical Atlantic	1998-08-15	75	1.57	0.45	3.23	0.11	-0.0477556	1.80892	-0.323871	5.3186	6.2453	5.99332	0	0	3.96255e+10	796.97	0	0.168857	3.90823
27.2649	-78.4	Tropical Atlantic	1998-09-15	75	1.57	0.45	3.23	0.11	-0.0477556	1.80892	-0.323871	4.95504	6.22526	5.99332	2.21073e+07	2.21073e+07	3.93735e+10	450.45	0	0.168857	3.90823
-15.9057	145.658	Central Indo-Pacific	2002-03-15	75	0	1.38	9.98	0.53	-1.41904	-0.281533	0.170404	5.2473	6.67168	7.25377	0	0	7.98084e+09	25127.6	0	0.0604	3.84805
26.6	50.8	Western Indo-Pacific	1998-08-15	75	8.48	2.64	22.38	0.8	-1.74926	3.63763	-2.47689	3.25648	4.16105	4.6919	0	0	0	33482.4	0	0.155458	3.63342
-18.768	178.568	Central Indo-Pacific	2000-06-15	75	1.1	0.94	7.81	0.3	-1.23065	-0.858133	0.143977	6.66844	7.0355	6.96541	4.86374e+08	4.86374e+08	8.43368e+09	4820.71	2	0.0527	3.9548
-15.6085	145.627	Central Indo-Pacific	2002-03-15	75	0	1.31	9.51	0.49	-1.40733	-0.297626	0.173923	5.47073	6.96515	7.56545	0	0	8.28517e+09	31921.3	0	0.0903	3.84805
-15.1405	145.576	Central Indo-Pacific	2002-03-15	30	0	1.14	9.02	0.4	-1.38326	-0.35441	0.181004	5.54641	7.14289	7.67132	0	0	9.74513e+09	26890.6	0	0.0797	3.86181
-23.17	43.59	Western Indo-Pacific	2007-03-15	5	1	1.4	8.88	0.55	-1.49045	-0.45099	-0.163665	7.34869	7.50179	7.39606	1.86918e+08	1.86918e+08	8.37674e+09	1969.94	0	0.0874	3.69979
26.275	50.94	Western Indo-Pacific	1996-10-15	75	14.82	2.71	23.78	0.9	-1.77829	3.62543	-2.6257	3.88026	4.49387	4.83845	0	0	0	28665.5	0	0.156071	3.63574
24.4363	122.986	Central Indo-Pacific	1998-10-15	75	4.99	0.97	7.42	0.3	0.0194201	1.69128	-0.3233	6.07526	7.15168	7.59481	3.14688e+09	3.14688e+09	7.25374e+10	599	2	0.0289	3.61985
-16.8751	146.398	Central Indo-Pacific	2002-03-15	5	0	1.03	8.11	0.36	-1.3335	-0.402141	0.235413	5.20041	6.35404	6.98022	0	0	8.44376e+09	42248.3	2	0.0447	3.83167
18	-111.5	Tropical Eastern Pacific	1997-08-15	5	5.35	2.09	18.09	0.76	0.56566	1.39525	1.07949	4.77094	5.09648	5.23949	6.3568e+08	1.35396e+09	8.01554e+10	96893.6	2	0.032806	3.4036
-15.4852	145.655	Central Indo-Pacific	2002-03-15	75	1.29	1.38	9.19	0.52	-1.35221	-0.378822	0.197774	5.47073	6.96515	7.56545	0	0	8.59087e+09	39915.6	0	0.0656	3.86181
-14.1203	144.525	Central Indo-Pacific	2002-03-15	30	4.22	0.98	5.81	0.4	-1.40277	-0.272687	0.141666	5.78602	7.5464	7.672	0	0	8.67746e+09	192.31	0	0.0843	3.86897
-18.728	178.466	Central Indo-Pacific	2000-06-15	75	0	1.09	7.14	0.41	-1.1996	-0.877807	0.137854	6.66844	7.0355	6.96541	4.652e+08	4.652e+08	8.42477e+09	4093.44	2	0.0567941	3.94811
22.559	69.3347	Western Indo-Pacific	1998-05-15	30	0	1.24	8.94	0.45	-0.193345	1.59026	-0.657211	4.64046	5.41456	5.95812	0	0	5.702e+09	3718.8	0	0.220506	3.59758
26.2923	50.9617	Western Indo-Pacific	1998-08-15	75	9.22	2.72	23.06	0.86	-1.75849	3.61032	-2.62872	4.3846	4.62375	4.83845	0	0	0	27812.2	0	0.145848	3.63574
-15.7921	145.797	Central Indo-Pacific	2002-03-15	5	3.51	1.49	11.88	0.51	-1.3239	-0.406527	0.205438	5.34478	6.79697	7.40414	0	0	8.42447e+09	37841.8	0	0.0463	3.84805
26.04	50.894	Western Indo-Pacific	1996-09-15	75	13.14	2.79	22.75	0.99	-1.77525	3.59523	-2.6845	3.57563	3.80259	4.42011	0	0	0	11648.2	0	0.189037	3.63574
-16.691	146.253	Central Indo-Pacific	1998-04-15	30	1.22	1.2	8.44	0.44	-1.29855	-0.430276	0.245105	5.71542	6.54351	7.05662	1.22085e+09	1.22085e+09	7.87029e+09	38762.2	0	0.0434	3.83167
25.988	50.884	Western Indo-Pacific	1996-09-15	75	15.59	2.88	23.51	0.99	-1.77546	3.5938	-2.69179	3.57563	3.80259	4.42011	0	0	0	10482.1	0	0.267713	3.63574
-14.1012	144.32	Central Indo-Pacific	1998-04-15	5	0	1.1	10.75	0.34	-1.41723	-0.23346	0.0819849	5.247	5.93009	7.32735	1.11467e+09	1.11467e+09	7.73014e+09	591.08	0	0.09	3.86498
-15.2046	145.743	Central Indo-Pacific	2002-03-15	5	2.28	1.43	11.51	0.43	-1.28463	-0.479204	0.217703	5.63076	7.16284	7.71385	0	0	9.8188e+09	42842.7	0	0.0737	3.86181
-15.365	145.782	Central Indo-Pacific	2002-03-15	5	1.64	1.31	12.32	0.48	-1.26782	-0.488191	0.224549	5.63076	7.16284	7.71385	0	0	9.25797e+09	46642.3	0	0.059	3.86181
-14.6644	145.65	Central Indo-Pacific	2002-03-15	5	5.28	1.32	10.23	0.4	-1.26188	-0.507735	0.216013	5.81962	7.37847	7.87422	0	0	1.36073e+10	18567	0	0.0792	3.86181
-14.4448	145.41	Central Indo-Pacific	2002-03-15	5	0	0.99	7.98	0.31	-1.25537	-0.491952	0.229494	5.83813	7.44127	7.90313	0	0	1.4032e+10	22839.6	0	0.073	3.86897
26.9029	50.9448	Western Indo-Pacific	1998-08-15	30	7.93	2.69	21.54	0.85	-1.43633	3.40865	-2.12012	2.94007	4.12095	4.49286	0	0	0	70764.9	0	0.112179	3.63342
-14.4984	145.537	Central Indo-Pacific	2002-03-15	5	1.29	1.19	7.86	0.36	-1.23127	-0.529592	0.226089	5.83813	7.44127	7.90313	0	0	1.51349e+10	18580.9	0	0.0765	3.87297
-14.176	144.218	Central Indo-Pacific	2002-03-15	5	4.52	1.55	10.92	0.63	-1.40195	-0.219878	0.0227043	5.55662	7.22968	6.40144	0	0	7.11556e+09	52.55	0	0.114175	3.86498
-16.7601	147.726	Central Indo-Pacific	1998-02-15	75	0	1.22	9	0.47	-1.16415	-0.622559	0.29052	5.67306	7.23094	7.28664	3.44389e+09	5.09991e+09	1.39833e+10	189087	0	0.0441	3.83917
26.5914	-77.9041	Tropical Atlantic	1998-10-15	30	1.73	0.75	5.38	0.21	0.0861412	1.78034	-0.275744	4.83401	5.95868	5.99671	0	0	4.84274e+10	1669.14	0	0.0503	3.90823
-17.8992	178.758	Central Indo-Pacific	1998-04-15	5	0	1.52	19.13	0.37	-1.10837	-0.921354	0.135343	7.13553	7.2421	6.62306	0	6.32292e+08	1.02681e+10	12246.8	0	0.117948	3.98144
-17.788	178.728	Central Indo-Pacific	2000-06-15	30	1.49	1.59	15.89	0.53	-1.1062	-0.915229	0.134417	6.37859	6.80461	6.57762	2.10988e+08	2.10988e+08	1.11106e+10	44.99	0	0.0818	3.98144
16.94	54.81	Western Indo-Pacific	1998-05-15	75	6.15	2.47	26.67	0.68	-0.566991	-1.13997	-0.0788667	4.07171	4.74857	4.68486	0	0	3.03078e+09	538.97	2	0.272362	3.58081
-18.1251	179.355	Central Indo-Pacific	2000-04-15	75	1.79	0.76	7.87	0.25	-1.07495	-0.978765	0.0992003	5.90549	6.93138	6.84741	1.90355e+08	1.90355e+08	9.32832e+09	1025	0	0.0343	3.98144
25.1879	-77.0225	Tropical Atlantic	1998-09-15	30	5.23	0.73	5.23	0.2	0.125789	1.7418	-0.306284	5.00535	5.88675	5.93617	0	0	2.19388e+10	3614.43	0	0.122946	3.9497
-12.8	-38.2	Tropical Atlantic	1998-04-15	75	3.96	1.22	11.17	0.32	-0.897346	-1.23341	0.0529253	4.94158	5.7665	6.24465	0	0	0	107.63	2	0.0852	3.98507
-18.5	177.9	Central Indo-Pacific	2000-03-15	75	7.61	1.2	7.79	0.44	-1.04631	-0.992583	0.129143	6.09116	6.90128	7.10083	1.63808e+08	1.63808e+08	9.29015e+09	15631.6	2	0.0550757	3.97467
25.414	-77.923	Tropical Atlantic	1998-10-15	30	2.52	0.75	5.72	0.25	0.207042	1.69309	-0.225551	4.37181	5.37242	5.47984	2.01374e+08	2.01374e+08	1.90978e+10	1416.63	0	0.0491	3.93984
-17.9418	179.323	Central Indo-Pacific	2000-04-15	75	5.18	1.31	12.73	0.41	-1.04194	-0.999291	0.0838783	5.90925	6.91849	6.78301	1.68738e+08	1.68738e+08	9.32354e+09	1650.08	0	0.0515	3.98144
-13.6662	143.69	Central Indo-Pacific	2002-03-15	75	3.74	1.78	12.3	0.68	-1.29212	-0.320786	0.0390311	5.6457	7.313	7.05121	592178	592178	7.77607e+09	151.56	0	0.0786	3.86498
-18.402	177.934	Central Indo-Pacific	2000-04-15	75	4.55	0.79	6.15	0.29	-1.02327	-1.01241	0.130665	6.05997	7.10012	7.10083	2.07081e+08	2.07081e+08	9.30912e+09	5860.52	2	0.0738	3.97467
-12.7139	143.606	Central Indo-Pacific	1998-04-15	30	5.6	1.27	11.44	0.41	-1.17969	-0.511266	0.160038	5.53098	6.84831	7.5294	8.93292e+08	8.93292e+08	7.57163e+09	15776.9	1	0.0699	3.87407
-13.9156	143.839	Central Indo-Pacific	2002-03-15	5	2.84	1.67	10.18	0.71	-1.30651	-0.303502	0.00455654	5.71087	7.4003	7.30135	0	0	6.70882e+09	8885.15	0	0.0889	3.86498
-12.7831	143.487	Central Indo-Pacific	2002-03-15	5	0	1.65	17.53	0.53	-1.19161	-0.448546	0.132621	5.73907	7.49594	7.5294	3.61795e+06	3.61795e+06	8.48657e+09	7504.18	0	0.14434	3.87013
-12.78	143.413	Central Indo-Pacific	2002-03-15	5	1.18	1.77	11.78	0.63	-1.19057	-0.443993	0.130344	5.73907	7.49594	7.5294	3.58491e+06	3.58491e+06	8.4114e+09	1870.99	0	0.235776	3.87013
-12.7524	143.396	Central Indo-Pacific	2002-03-15	5	1.17	2.41	16.7	0.83	-1.19009	-0.441058	0.128975	5.73907	7.49594	7.5294	3.63904e+06	3.63904e+06	7.89277e+09	226.74	0	0.235776	3.87013
-12.5333	143.533	Central Indo-Pacific	1998-04-15	5	2.79	1.11	9.76	0.36	-1.16719	-0.500612	0.137694	5.53071	6.45613	7.50347	8.83191e+08	8.83191e+08	6.18732e+09	13547.1	2	0.0832	3.87407
-14.078	143.911	Central Indo-Pacific	2002-03-15	75	3.95	1.61	10.28	0.66	-1.29744	-0.29198	-0.0224992	5.6864	7.34962	7.17961	0	0	6.29821e+09	23256.7	0	0.0791	3.86498
-13.9438	143.754	Central Indo-Pacific	2002-03-15	75	2.44	1.57	10.47	0.67	-1.28645	-0.310798	-0.00966033	5.71087	7.4003	7.30135	0	0	6.51283e+09	354.48	0	0.101164	3.86498
-13.868	143.714	Central Indo-Pacific	2002-03-15	30	1.1	1.83	13.55	0.7	-1.28341	-0.316067	-0.00499683	5.6457	7.313	7.05121	0	0	6.73178e+09	12829.6	0	0.0735	3.86498
-14.1273	143.999	Central Indo-Pacific	2002-03-15	75	6.51	1.48	10.52	0.59	-1.29855	-0.282866	-0.029284	5.40131	7.01435	6.34275	0	0	6.52692e+09	23398	0	0.079	3.86498
-12.4167	143.5	Central Indo-Pacific	1998-04-15	5	0	1.02	6.68	0.35	-1.16051	-0.493669	0.120957	5.53071	6.45613	7.50347	8.61465e+08	8.61465e+08	5.57274e+09	24351	0	0.0964	3.88154
-12.4833	143.425	Central Indo-Pacific	1998-04-15	5	3.68	1.26	9.14	0.45	-1.16716	-0.470856	0.11069	5.53071	6.45613	7.50347	8.13821e+08	8.13821e+08	5.82968e+09	11782.7	0	0.138909	3.87759
-14.0645	143.855	Central Indo-Pacific	2002-03-15	75	4.91	1.46	10.1	0.57	-1.27048	-0.302055	-0.0347536	5.71087	7.4003	7.30135	0	0	6.21846e+09	17589.9	0	0.0889	3.86498
-12.3	143.417	Central Indo-Pacific	1998-04-15	5	3.29	1.19	8.32	0.48	-1.15785	-0.48396	0.10103	5.66126	6.73004	7.484	8.44024e+08	8.44024e+08	5.11333e+09	407.52	0	0.0781	3.87759
-12.3167	143.333	Central Indo-Pacific	1998-04-15	5	4.87	1.45	10.77	0.57	-1.15676	-0.459454	0.0790487	8	6.86667	7.51682	7.99626e+08	7.99626e+08	5.09832e+09	7648.72	0	0.0947	3.87759
-12.1437	143.371	Central Indo-Pacific	1998-04-15	5	5.12	1.29	8.21	0.5	-1.13927	-0.491554	0.0773756	8	6.86667	7.51682	8.53798e+08	8.53798e+08	4.72467e+09	13504.7	0	0.14655	3.87759
16.733	-169.546	Eastern Indo-Pacific	1996-09-15	30	0	1.01	9.89	0.23	0.843658	1.17883	1.06116	7.52714	7.42404	7.84912	0	0	2.72764e+09	614.77	0	0.0296	3.85101
16.744	-169.512	Eastern Indo-Pacific	1996-09-15	30	1.06	1.04	9.21	0.23	0.843658	1.17883	1.06116	7.52714	7.42404	7.84912	0	0	2.61797e+09	140.79	0	0.0612	3.85101
16.714	-169.556	Eastern Indo-Pacific	1996-09-15	30	0	1.01	9.89	0.23	0.847368	1.17614	1.06097	7.52714	7.42404	7.84912	0	0	2.76624e+09	1301.01	0	0.0296	3.85101
23.7413	-76.0054	Tropical Atlantic	1998-08-15	5	1.01	0.79	5.37	0.3	0.412489	1.52983	-0.110028	5.80458	5.88459	5.94255	0	0	1.73268e+10	2514.23	2	0.0398579	3.96672
24.5	-81.05	Tropical Atlantic	1997-08-15	30	1.13	0.8	4.98	0.27	0.272864	1.59318	-0.401007	5.40359	6.48387	6.58956	0	3.5921e+08	1.41106e+10	21473.9	2	0.0385	3.90888
-12.0975	143.264	Central Indo-Pacific	1998-04-15	5	6.66	1.22	9.28	0.39	-1.13449	-0.473299	0.0582611	5.15736	6.07007	7.20982	8.09035e+08	8.09035e+08	4.53765e+09	11737.6	0	0.108596	3.87759
-18.8667	-159.75	Eastern Indo-Pacific	2000-04-15	75	0	1.71	12.96	0.66	-0.794856	-1.26509	0.167455	6.14586	6.6337	6.84496	4.78611e+06	4.78611e+06	6.78028e+09	238.42	2	0.0226	4.05894
-11.9517	143.269	Central Indo-Pacific	2002-03-15	5	3.81	1.49	10.48	0.58	-1.12535	-0.480386	0.0569243	5.88525	7.47169	7.20982	1.08782e+07	1.08782e+07	4.26715e+09	53.55	0	0.0784	3.87759
-16.834	179.299	Central Indo-Pacific	2000-06-15	75	0	0.89	8.22	0.27	-0.943274	-1.0509	0.0379601	6.30142	6.73196	6.36731	8.12505e+07	8.12505e+07	9.68279e+09	1571.9	2	0.0388	4.00191
-16.8	179.3	Central Indo-Pacific	2000-03-15	75	0	0.93	8.35	0.32	-0.943274	-1.0509	0.0379601	5.75848	6.36239	6.36731	1.86822e+07	1.86822e+07	9.43894e+09	125.84	0	0.0806	4.00191
-3.37	40.01	Western Indo-Pacific	1998-04-15	75	14.815	2.0425	19.4575	0.6375	-0.795855	-1.28674	0.0853901	5.1272	6.35651	7.31523	0	0	0	875.06	2	0.0599	3.81915
-3.2218	40.1403	Western Indo-Pacific	1998-12-15	75	0	2.03	19.71	0.87	-0.791104	-1.28995	0.106442	7.29292	6.92284	7.35117	0	0	0	1216.63	2	0.197499	3.81915
-3.48	39.95	Western Indo-Pacific	2005-05-15	5	1.07	1.95	22.67	0.64	-0.797439	-1.28276	0.072184	7.34411	7.38591	7.29055	0	0	0	1553.68	2	0.0542	3.81915
24	-74.6	Tropical Atlantic	1998-08-15	75	0	0.74	5.66	0.25	0.65095	1.40986	0.273421	6.16961	6.39702	6.49582	0	0	2.90642e+10	5920.06	0	0.0254	3.97575
-11.3915	143.072	Central Indo-Pacific	1998-04-15	5	1.19	1.49	13.31	0.55	-1.04376	-0.565022	0.0378036	5.35918	6.37741	7.1826	7.06802e+08	7.06802e+08	2.86966e+09	11380.9	0	0.0938	3.88362
-11.5963	142.938	Central Indo-Pacific	1998-04-15	5	4.88	1.25	7.25	0.48	-1.05321	-0.515335	0.0402859	5.35918	6.37741	7.1826	6.31889e+08	6.31889e+08	3.17898e+09	676.46	0	0.0735	3.87759
-3.9	39.81	Western Indo-Pacific	2009-04-15	5	1.92	1.48	15.02	0.52	-0.806106	-1.25929	0.00675394	7.29121	7.28967	7.08243	0	0	0	1739.66	2	0.0428	3.81871
-2.2456	41.0642	Western Indo-Pacific	1998-03-15	5	4.19	1.62	17.53	0.56	-0.732935	-1.3477	0.147296	5.21286	6.41943	7.26803	0	0	0	8032.21	2	0.169252	3.81776
-16.7	179.9	Central Indo-Pacific	2000-06-15	30	0	0.95	6.2	0.34	-0.818365	-1.14434	0.101459	6.34426	6.75758	6.81828	5.77056e+07	5.77056e+07	9.59016e+09	1761.99	0	0.048	4.00868
13.5	109.333	Central Indo-Pacific	1998-07-15	75	9.21	2.02	11.78	1.01	0.54554	1.09749	-0.281266	9.4	7.4	6.69801	0	8.97982e+08	1.78635e+10	3022.28	2	0.124043	3.65596
2.96	-78.175	Tropical Eastern Pacific	1998-04-15	30	35.08	4.42	39.37	1.58	1.25893	0.297286	0.610968	3.78214	3.77346	5.15048	0	0	0	88.77	0	0.129615	3.36225
-4.1104	39.6796	Western Indo-Pacific	2010-03-15	5	1.59	1.52	13.96	0.63	-0.801107	-1.25954	-0.0135511	6.49364	7.03014	7.08243	0	0	0	1286.06	2	0.0519	3.81871
-1.7226	41.5222	Western Indo-Pacific	1998-04-15	30	15.24	1.54	17.36	0.52	-0.717234	-1.36732	0.131746	5.08446	6.38796	7.14293	0	0	0	1549.32	0	0.113865	3.81715
-11.1703	143.097	Central Indo-Pacific	1998-04-15	5	2.88	1.61	13.51	0.62	-1.01106	-0.599124	0.0423107	5.62826	6.70173	7.30628	6.74401e+08	6.74401e+08	2.48695e+09	32552.4	0	0.0716	3.88362
-1.75	41.4833	Western Indo-Pacific	2001-04-15	75	0	1.59	19.164	0.492	-0.71565	-1.36719	0.135034	6.2834	7.03212	7.14293	0	0	0	596.24	0	0.0563	3.81776
-4.7083	39.3667	Western Indo-Pacific	2005-05-15	5	1.42	1.43	8.09	0.58	-0.824284	-1.21108	-0.00705548	7.70129	7.08392	6.9746	0	0	0	4262.09	0	0.0924	3.81853
-11.2578	142.873	Central Indo-Pacific	1998-04-15	5	2.47	1.37	10.04	0.42	-1.00763	-0.569435	0.0476646	4.28765	6.07716	7.4091	5.45816e+08	5.45816e+08	2.47675e+09	897.32	0	0.106206	3.88362
-4.37	39.58	Western Indo-Pacific	2005-05-15	5	1.61	1.44	11.59	0.53	-0.803863	-1.24807	-0.0265585	7.54047	7.25234	7.12323	0	0	0	2187.66	2	0.0498	3.81871
-5.025	39.24	Western Indo-Pacific	1998-05-15	30	9.24	1.46	10.55	0.53	-0.826931	-1.19941	-0.0126537	4.29197	4.50343	6.17092	0	0	2.66759e+06	8358.52	1	0.0922	3.81853
-4.4996	39.4824	Western Indo-Pacific	2010-06-15	5	3.49	1.71	13.16	0.68	-0.806758	-1.23643	-0.0166414	7.38912	6.96725	6.91931	0	0	0	906.31	2	0.0684	3.81979
3.9	-81.6	Tropical Eastern Pacific	1998-03-15	5	8.95	2.8	19.48	1.29	0.856641	-0.682249	0.143781	4.91669	4.62909	5.79171	0	0	0	10942.9	2	0.07	3.35934
-11.0722	143.091	Central Indo-Pacific	1998-04-15	5	3.34	1.6	13.26	0.56	-0.994819	-0.613051	0.0411835	5.74197	6.86023	7.3802	6.38221e+08	6.38221e+08	2.28908e+09	33107.1	0	0.0626	3.88362
-18.742	-141.797	Eastern Indo-Pacific	1994-07-15	5	0	1.01	7.55	0.36	-0.691673	-1.36475	-0.0436744	5.93203	6.21863	6.65702	0	0	4.13498e+08	1612.28	0	0.0249	4.02641
-18.705	-141.832	Eastern Indo-Pacific	1994-07-15	5	0	1.06	7.96	0.33	-0.68884	-1.36712	-0.0444089	5.93203	6.21863	6.65702	0	0	4.12733e+08	458.77	2	0.0234	4.02641
-5.1167	39.2167	Western Indo-Pacific	1998-05-15	30	8.78	1.45	8.77	0.56	-0.822012	-1.19922	-0.0196573	4.29197	4.50343	6.17092	0	0	2.78189e+06	5621.16	2	0.0524	3.81853
-11.0095	142.986	Central Indo-Pacific	1998-04-15	5	2.19	1.45	12.27	0.53	-0.985662	-0.606143	0.0435909	5.74197	6.86023	7.3802	5.5284e+08	5.5284e+08	2.12974e+09	587.41	0	0.0752	3.88362
-5.187	39.103	Western Indo-Pacific	2003-04-15	5	2.13	1.85	15.25	0.67	-0.80602	-1.20705	-0.0137551	10.6	10.6	6.66887	0	0	2.79117e+06	706.37	0	0.0583	3.81853
-9.7357	147.398	Central Indo-Pacific	1998-05-15	5	9.79	1.52	11.51	0.47	-0.952906	-0.935962	-0.134916	5.64987	6.68644	7.40238	8.64923e+07	8.64923e+07	2.66665e+09	5158.93	0	0.0891	3.90327
22.6329	-78.6461	Tropical Atlantic	2005-10-15	75	5.85	1.12	8.73	0.4	0.620491	1.28543	-0.171849	6.30169	6.76245	6.16773	4.96936e+08	4.96936e+08	1.58032e+10	751.92	2	0.0418	3.9363
-10.8014	142.983	Central Indo-Pacific	1998-04-15	5	4.11	1.62	13.09	0.59	-0.963114	-0.641631	0.0413559	5.68285	6.70372	7.32004	5.00803e+08	5.00803e+08	1.82935e+09	33422.6	0	0.0825	3.88362
22.581	-78.3961	Tropical Atlantic	2009-09-15	30	0	1.09	9.31	0.33	0.637914	1.28767	-0.13803	5.81054	6.61154	6.18394	0	2.34772e+08	1.61535e+10	3089.08	1	0.04	3.94825
-5.8171	39.3827	Western Indo-Pacific	2010-05-15	30	2.44	1.78	11.36	0.71	-0.811278	-1.19452	-0.0659123	6.61133	6.69989	6.4417	0	0	6.49932e+06	234.04	0	0.0499	3.81646
-5.8143	39.3847	Western Indo-Pacific	2010-10-15	30	0	1.78	11.36	0.71	-0.811278	-1.19452	-0.0659123	7.11999	6.76717	6.4417	0	0	6.49418e+06	442.29	0	0.0499	3.81646
-10.7049	142.732	Central Indo-Pacific	1998-04-15	5	4.06	1.81	14.39	0.7	-0.946606	-0.63508	0.0508532	5.72612	7.08407	7.32322	3.67623e+08	3.67623e+08	1.60433e+09	12629.1	0	0.169985	3.88362
-6	39.55	Western Indo-Pacific	1998-03-15	30	1.17	1.55	9.78	0.55	-0.825695	-1.17871	-0.108474	4.95739	6.12985	6.6241	0	0	7.75426e+06	15028.8	2	0.0408	3.81516
-10.8913	142.695	Central Indo-Pacific	1998-04-15	5	5.24	1.61	12.49	0.54	-0.948628	-0.613765	0.0504746	5.24171	7.55387	7.43553	3.87116e+08	3.87116e+08	1.81211e+09	121.86	0	0.194963	3.88362
-10.6782	142.737	Central Indo-Pacific	1998-04-15	5	4.16	1.69	13.3	0.62	-0.939202	-0.645769	0.0525341	5.72612	7.08407	7.32322	3.59943e+08	3.59943e+08	1.57299e+09	2789.66	0	0.169985	3.88362
-12.9614	40.5592	Western Indo-Pacific	2008-10-15	5	0	1.484	10.78	0.544	-0.836949	-1.17255	-0.158404	7.02304	6.69205	6.64514	0	6.8944e+07	2.93434e+09	530.26	1	0.0529	3.78572
-6.426	39.346	Western Indo-Pacific	2003-04-15	5	1.01	1.35	7.88	0.52	-0.823436	-1.15744	-0.112621	6.24627	6.31826	6.6693	0	0	1.00547e+07	467.96	0	0.0587	3.81646
21.5956	-77.0496	Tropical Atlantic	2003-10-15	30					0.886104	1.1881	0.335066	7.21632	7.26843	7.04848	0	1.04644e+06	1.22014e+10	1319.39	0	0.0362	3.95686
-6.2742	39.2848	Western Indo-Pacific	2003-04-15	5	3.8475	2.025	14.745	0.795	-0.80795	-1.16614	-0.102717	6.23957	6.29609	6.21619	0	0	8.06011e+06	101.23	0	0.115385	3.81646
-6.3031	39.195	Western Indo-Pacific	1998-03-15	30	0	1.35	10.24	0.55	-0.802557	-1.16352	-0.0966865	3.9597	4.43041	6.21619	0	0	7.81897e+06	2800.73	0	0.0556	3.81646
-11.0257	40.6359	Western Indo-Pacific	2008-10-15	5	0	1.33	11.7	0.56	-0.834762	-1.10479	-0.0937294	6.89974	6.6294	6.43467	0	0	1.7222e+09	734.68	0	0.0728	3.7948
-11.0093	40.6099	Western Indo-Pacific	2008-10-15	5	0	1.27	11.19	0.5	-0.834762	-1.10479	-0.0937294	6.88787	6.64743	6.51412	0	0	1.64288e+09	1694.04	0	0.0933	3.7948
-6.2805	39.1743	Western Indo-Pacific	2010-05-15	30	3.26	1.48	10.71	0.64	-0.798239	-1.16801	-0.0914701	6.40864	6.56546	6.21619	0	0	7.64192e+06	172.73	0	0.0659	3.81646
-10.9953	40.6928	Western Indo-Pacific	2008-10-15	5	0	1.49	10.56	0.59	-0.832557	-1.11457	-0.123911	6.89974	6.6294	6.43467	0	0	1.75641e+09	1363.21	1	0.0553	3.7948
-6.07	39.11	Western Indo-Pacific	2005-04-15	5	1.12	1.83	12.47	0.84	-0.760921	-1.19701	-0.0387854	4.52435	4.79721	5.1095	6.62563e+06	6.62563e+06	6.62563e+06	10394.7	0	0.061	3.81646
-10.3477	40.3384	Western Indo-Pacific	1998-05-15	30	2.34	2.23	16.18	0.85	-0.825756	-1.14318	-0.180024	7.01333	6.79467	6.6022	0	0	1.05718e+09	711.44	0	0.0542	3.80063
-10.34	40.374	Western Indo-Pacific	2008-04-15	5	0	1.68	11.96	0.68	-0.825484	-1.14274	-0.178215	6.35743	6.81622	6.6022	0	0	1.07698e+09	1754.92	0	0.084	3.80063
-8.1167	39.7	Western Indo-Pacific	1998-03-15	75	0	1.27	11.43	0.41	-0.808932	-1.1732	-0.179321	5.17893	6.19486	6.62854	0	0	1.77549e+08	5445.26	2	0.106723	3.80888
-10.28	40.4	Western Indo-Pacific	2008-04-15	5	2.38	1.33	10.06	0.59	-0.823908	-1.14436	-0.181444	6.26845	6.7399	6.06222	0	0	1.0661e+09	1718.99	2	0.0556	3.80063
-8.7242	39.5216	Western Indo-Pacific	1998-12-15	75	0	1.23	9.55	0.46	-0.800945	-1.16136	-0.145186	6.46984	6.11836	6.59313	0	0	2.42486e+08	9802.11	2	0.0816	3.80493
-7.9516	39.8137	Western Indo-Pacific	1998-10-15	75	0	1.52	13.01	0.52	-0.799716	-1.171	-0.197695	7.06089	6.02561	6.62854	0	0	1.62568e+08	1008.53	2	0.036544	3.80888
-8.0469	39.5975	Western Indo-Pacific	2007-04-15	5	0	1.33	12.83	0.38	-0.762024	-1.18839	-0.0934759	6.37612	6.78114	6.63234	3.81755e+06	3.81755e+06	1.15105e+08	7517.35	0	0.0868	3.80888
21.132	-75.828	Tropical Atlantic	2009-09-15	75	0	0.93	6.13	0.32	0.987229	1.13046	0.434417	6.68097	7.39854	6.73189	0	7.911e+07	1.319e+10	650.61	2	0.0275	3.96116
12.2417	-68.2428	Tropical Atlantic	1998-08-15	30	0	0.79	5.445	0.2575	1.1786	0.916795	1.05522	7.14244	7.21378	7.76178	0	0	3.00369e+09	1570.06	2	0.0368	3.82443
-8.063	39.4282	Western Indo-Pacific	2005-04-15	5	0	1.68	17.17	0.49	-0.734941	-1.1808	-0.0517634	6.05512	6.489	6.63234	2.18484e+07	2.18484e+07	4.9319e+07	422.83	1	0.0801	3.81023
21.5544	-72.9692	Tropical Atlantic	1998-08-15	75	0	0.92	5.47	0.31	1.04559	1.08653	0.488885	6.68736	6.59572	7.00257	0	1.08371e+07	2.13827e+10	1050.28	2	0.0255925	3.99648
-17.8167	177.367	Central Indo-Pacific	2000-03-15	75	0.5	0.815	5.74	0.255	-0.724356	-1.1342	-0.0658219	5.76189	6.58677	6.91106	1.29355e+08	1.29355e+08	1.49244e+10	1810.03	0	0.0661	3.96798
-11.4909	43.401	Western Indo-Pacific	1998-05-15	75	9.61	1.47	10.3	0.52	-0.781594	-1.16424	-0.347232	4.82369	4.89266	5.23635	0	0	4.87676e+09	72.26	2	0.032	3.79176
-12.2134	96.8636	Central Indo-Pacific	1998-11-15	75	0	1.47	14.55	0.52	-0.196765	-1.57956	-0.344534	9.32981	7.87061	7.90173	1.22294e+09	1.22294e+09	1.3091e+10	1229.29	2	0.0328	3.75344
8.4522	-79.0097	Tropical Eastern Pacific	1998-04-15	30	0	1.73	20.21	0.44	1.20279	0.879452	0.424257	5.14191	4.37165	4.49252	0	0	1.96685e+08	773.17	0	0.369807	3.55845
18.309	-65.655	Tropical Atlantic	2005-09-15	30	7.2	1.08333	12.18	0.26	1.1983	0.943963	0.593761	6.12909	6.67687	7.22694	0	1.83995e+09	2.65173e+10	865	1	0.0756	4.00184
-12.2755	43.75	Western Indo-Pacific	1998-05-15	75	4.94	1.73	11.05	0.66	-0.755033	-1.1768	-0.337281	4.90525	4.75437	5.09519	0	0	5.39345e+09	1059.11	2	0.039	3.78612
-12.6722	45.0567	Western Indo-Pacific	2010-06-15	30	6.18	1.1	9.15	0.4	-0.729094	-1.21954	-0.364402	4.45375	4.37894	4.47954	0	0	5.27083e+09	409.38	0	0.0628	3.78084
23.16	-82.6	Tropical Atlantic	2009-09-15	75	0	0.85	5.89	0.24	0.914727	1.10966	-0.104737	5.46078	6.66924	6.2046	0	3.80511e+07	1.44199e+10	12552.6	2	0.0286	3.87979
13.0391	-59.5231	Tropical Atlantic	1998-09-15	30	0	1.112	12.334	0.296	1.34965	0.811373	0.915891	6.85714	7.01204	7.36692	0	0	8.69305e+09	716.91	0	0.0382	3.9168
10.5333	108.95	Central Indo-Pacific	1998-07-15	75	4.84	1.83	13.43	0.83	0.761894	0.505579	-0.604033	5.75932	7.03659	7.87491	0	2.59344e+08	1.02071e+10	1701.1	2	0.0581	3.68646
-13.0668	45.1106	Western Indo-Pacific	1998-04-15	30	9.21	1.21	10.49	0.39	-0.716268	-1.20429	-0.37142	3.79509	4.04446	4.4662	0	0	6.66155e+09	7346.75	0	0.0679	3.78084
-17.6	-149.3	Eastern Indo-Pacific	1994-03-15	30	0	0.883333	5.71667	0.3	-0.415634	-1.56244	-0.194114	5.64341	6.27537	6.45974	0	0	1.2677e+09	260.5	0	0.0288	4.08539
-12.823	48.59	Western Indo-Pacific	2002-01-15	5	0	1.72	17.72	0.59	-0.602512	-1.33057	-0.310808	5.22947	4.8637	4.79167	0	0	6.87926e+09	191.1	2	0.0773	3.77472
22.883	-83.547	Tropical Atlantic	2003-11-15	30	1.54	0.7	4.54	0.26	1.00626	1.0531	-0.0762338	5.84476	6.11043	5.79744	1.99813e+06	1.99813e+06	1.55834e+10	877.78	0	0.0518	3.86307
26.5154	54.0491	Western Indo-Pacific	2007-08-15	75	3.97	1.3	12.59	0.35	-0.51445	2.64668	-2.06529	3.92602	4.37307	4.04428	633379	633379	633379	49.25	0	0.25843	3.63097
-10.1768	151.193	Central Indo-Pacific	1998-02-15	5	0	1.44	13.35	0.52	-0.369398	-1.31669	0.235202	5.20001	6.26728	6.34189	9.92188e+07	3.67999e+08	2.28446e+09	1119.09	0	0.0594	3.9169
-17.5156	-149.919	Eastern Indo-Pacific	2007-04-15	30	0	0.9	8.17	0.25	-0.349186	-1.60849	-0.207588	5.99579	6.46032	6.5144	5.44502e+06	5.44502e+06	1.51896e+09	570.02	0	0.0255	4.08803
20.4167	-87.3	Tropical Atlantic	1998-09-15	75	3.04	1.13	9.315	0.38	1.32898	0.809582	0.416761	6.4	6.4	6.95928	0	0	2.12837e+10	104.11	1	0.029	3.79592
19	-87.5717	Tropical Atlantic	1998-10-15	5	2.07	1	6.67	0.32	1.33672	0.795986	0.417593	5.65096	6.14518	6.62948	0	0	1.83825e+10	2098.21	2	0.0296041	3.76935
18.8126	-87.3594	Tropical Atlantic	1998-10-15	5	0	0.74	6.53	0.2	1.34162	0.804024	0.435896	6.22334	7.0585	6.7901	0	0	1.97944e+10	9406.68	2	0.0333	3.78611
-13.181	48.234	Western Indo-Pacific	2002-01-15	5	0	1.14	6.56	0.46	-0.538306	-1.38547	-0.339029	4.93447	4.45883	3.95677	0	0	7.76678e+09	3632.36	0	0.0769	3.77624
-13.1873	48.2823	Western Indo-Pacific	1998-02-15	30	1.47	1.35	8.46	0.52	-0.520095	-1.39749	-0.336857	2.5203	2.09702	3.95677	0	0	7.65025e+09	1455.38	0	0.0857	3.77624
-17.2493	119.334	Central Indo-Pacific	1998-11-15	5	0	1.75	13.23	0.74	-0.674862	-1.2178	-0.601122	5.40026	5.01634	5.11782	0	2.59362e+09	4.31119e+10	299218	2	0.037	3.75846
22.0322	-83.5648	Tropical Atlantic	2008-08-15	75	0	1.23	7.51	0.48	0.997659	0.994995	-0.326687	5.52948	6.10887	6.13043	8.0091e+07	1.3841e+08	1.38081e+10	5135.38	0	0.230413	3.86075
-10.5014	105.509	Central Indo-Pacific	1997-12-15	30	0	1.56	14.84	0.47	-0.252512	-1.62442	-0.484935	7.60088	7.18694	7.00734	0	6.47895e+07	3.78464e+09	2839.72	2	0.0352	3.75635
21.7646	-81.5735	Tropical Atlantic	2008-11-15	30	1.32	1.28	8.85	0.48	0.900126	1.0396	-0.506901	6.16742	6.30447	6.05476	1.89901e+09	1.94699e+09	1.53303e+10	13789.3	0	0.245321	3.89238
22.01	-84.92	Tropical Atlantic	2009-09-15	75	1.86	0.7	5.59	0.19	1.13116	0.956038	-0.0674152	5.35842	6.55482	6.50826	0	2.34438e+07	2.09634e+10	10410.1	2	0.0747	3.84372
16.87	-88.12	Tropical Atlantic	1998-09-15	75	1.91	1.63	11.19	0.72	1.30487	0.644719	0.0775928	4.75097	4.78781	5.55303	0	0	1.4929e+10	401.2	0	0.0814	3.74429
20.923	-78.9093	Tropical Atlantic	2007-08-15	5	0	0.83	6.8	0.23	0.943318	1.06839	-0.403885	5.57803	5.7465	5.66319	0	9.27645e+07	8.26175e+09	11193.5	0	0.0763	3.92602
16.8086	-87.6901	Tropical Atlantic	1998-10-15	75	1	1.09	6.69	0.43	1.41321	0.690634	0.344952	5.13896	5.21343	5.69927	0	0	1.58684e+10	10098.5	2	0.0335	3.74429
24.911	54.857	Western Indo-Pacific	1996-08-15	5	6.24	1.45	13.7	0.41	-0.735135	2.78497	-2.61823	3.62625	3.74248	4.39366	0	0	7.20534e+07	1666.75	0	0.1352	3.63193
16.63	-88.13	Tropical Atlantic	1998-11-15	75	7.5	1.97	12.2	0.96	1.33636	0.622227	0.0846106	5.04473	4.81614	5.71122	1.29708e+09	1.29708e+09	1.36744e+10	3809.7	0	0.118032	3.74429
-4.77	55.5	Western Indo-Pacific	2005-05-15	5	0	0.781429	6.83286	0.227143	-0.409674	-1.43453	-0.104552	4.64096	5.86583	5.83247	0	1.16669e+06	4.19621e+08	166.29	1	0.0384	3.80362
-13.49	48.24	Western Indo-Pacific	2007-03-15	5	0	1.06	9.59	0.39	-0.445732	-1.45551	-0.298631	5.22908	4.58905	3.54161	7.79066e+08	7.79066e+08	7.72607e+09	705.26	0	0.0657	3.77624
-13.485	48.24	Western Indo-Pacific	2002-01-15	5	0	1.06	9.59	0.39	-0.445732	-1.45551	-0.298631	4.67838	4.14143	3.54161	0	0	7.7318e+09	269.36	0	0.0657	3.77624
20.6996	-78.0883	Tropical Atlantic	2009-09-15	5	4.81	0.93	7.82	0.34	0.920798	1.07008	-0.52434	4.76048	5.83324	5.31358	0	2.15587e+09	8.64608e+09	177.3	0	0.268474	3.93838
-7.253	72.413	Western Indo-Pacific	2003-03-15	75	0	1.62	13.11	0.58	-0.255192	-1.60337	0.0367476	6.11314	6.46018	6.34761	2.14794e+07	2.14794e+07	3.9583e+09	2836.14	0	0.04	3.80801
-4.6461	55.4845	Western Indo-Pacific	1998-05-15	75	2.8675	0.91	9.195	0.25	-0.372092	-1.47098	-0.10675	4.58722	6.47122	5.83247	0	0	4.25069e+08	317.77	0	0.0481874	3.803
-4.63	55.37	Western Indo-Pacific	2005-04-15	5	0	0.933333	8.78	0.25	-0.377839	-1.46459	-0.120777	4.52078	5.95001	5.86033	0	0	4.28574e+08	451.36	1	0.053	3.803
-4.6	55.42	Western Indo-Pacific	2005-04-15	5	0	1.054	11.458	0.286	-0.374574	-1.46803	-0.114966	4.56053	5.90657	5.80178	0	0	4.21486e+08	1311.73	0	0.0353	3.803
15.9316	-86.4011	Tropical Atlantic	1998-09-15	30	3.17	1.65	10.88	0.62	1.50981	0.621514	0.385961	3.17434	3.11185	4.80897	0	0	1.72369e+10	7231.58	2	0.0653	3.75279
16.2	-88.35	Tropical Atlantic	1999-01-15	75	0	1.73	10.62	0.84	1.35926	0.539212	-0.0382085	3.63615	3.79605	5.1659	1.15549e+09	1.15549e+09	1.03174e+10	12388.9	0	0.0773	3.72694
23.853	58.095	Western Indo-Pacific	2002-08-15	5	6.78	1.5	13.98	0.58	0.171003	1.64267	-1.60925	3.92148	3.92455	3.60471	0	0	1.0742e+09	563.84	0	0.369664	3.62438
22.07	-81.1	Tropical Atlantic	2009-09-15	75	2.61	0.64	4.98	0.18	1.078	1.04636	-0.269047	4.97523	6.04903	5.81527	0	1.11815e+08	1.4564e+10	2049.45	0	0.0329	3.90672
-4.3	55.92	Western Indo-Pacific	2005-05-15	5	1.61	0.82	9.5	0.2	-0.30991	-1.54259	-0.0770128	4.61348	5.75134	5.70331	0	0	3.4965e+08	3823.92	2	0.0503	3.80988
-4.3347	55.7177	Western Indo-Pacific	1998-04-15	75	3.25	0.76	5.81	0.23	-0.317589	-1.53332	-0.0939533	4.47881	6.04119	5.67899	0	0	3.29939e+08	344.2	0	0.0924	3.80988
-4.3	55.7167	Western Indo-Pacific	2005-04-15	5	0	0.8475	7.815	0.24625	-0.317589	-1.53332	-0.0939533	4.64992	5.84877	5.67899	0	0	3.2739e+08	239.45	0	0.0612046	3.80988
25.339	55.333	Western Indo-Pacific	1996-08-15	5	4.25	1.45	14.09	0.49	-0.466784	2.57307	-2.34805	2.83121	2.90504	4.1131	0	0	1.07183e+08	1235.62	0	0.223954	3.63193
21.7386	-79.9994	Tropical Atlantic	2009-09-15	30	1.15	0.49	3.76	0.14	1.14703	0.995901	-0.167858	4.96089	6.10417	5.87383	0	1.78443e+08	1.03541e+10	954.41	2	0.114013	3.92042
-8.7144	115.609	Central Indo-Pacific	1998-06-15	5	4.77	1.77	17.37	0.64	-0.10794	-1.71082	0.171003	4.45665	4.64255	5.6655	0	0	3.48388e+08	1496.27	2	0.046	3.78259
21.922	-80.313	Tropical Atlantic	2009-09-15	5	1.15	0.526667	4.57333	0.143333	1.18158	0.998021	-0.138847	4.97083	6.02056	5.77503	0	1.4399e+08	1.11986e+10	176.31	2	0.0269	3.92042
18.3137	-75.0134	Tropical Atlantic	2006-11-15	75	4.95	0.84	6.12	0.23	1.53534	0.706138	0.458925	6.74976	6.72552	6.82187	2.31133e+08	2.32502e+08	9.18664e+09	8294.26	2	0.0264	3.92752
18.4138	-75.0298	Tropical Atlantic	2006-11-15	30	4.48	1.11	8.68	0.33	1.53249	0.708677	0.436478	6.3428	6.42537	6.46102	2.48177e+08	2.48177e+08	9.22948e+09	75.12	2	0.0261	3.92752
-15.1667	-147.667	Eastern Indo-Pacific	1994-03-15	5	1.88	1.09	7.98	0.43	-0.142003	-1.74389	-0.183771	5.65321	6.08418	6.51674	0	0	5.58142e+08	6547.06	0	0.048	4.10027
-6.1	71.7333	Western Indo-Pacific	1998-04-15	75	2.8	1.25	11.9	0.4	-0.0571902	-1.83438	-0.0349735	5.04009	6.29225	5.86206	0	3.74026e+07	1.46429e+09	22.45	0	0.046	3.81814
22.6	38.8167	Western Indo-Pacific	1998-08-15	75	3.84	1.15	10.48	0.34	0.764942	1.47614	-0.685645	3.90617	4.60639	5.24867	0	0	0	22634.4	1	0.0353	3.6334
-14.699	-145.246	Eastern Indo-Pacific	1994-07-15	5	0	1.38	11.7	0.47	-0.0741442	-1.81124	-0.177068	5.53333	5.8185	6.55988	0	0	7.32865e+07	708.32	0	0.0249	4.08324
17.7848	-77.5627	Tropical Atlantic	1998-10-15	30	3.75	0.9	6.84	0.27	1.65047	0.613136	0.515403	7.37485	7.38988	7.17278	4.67721e+07	4.67721e+07	1.55756e+10	7986.56	2	0.0404	3.89472
19.8475	-77.7286	Tropical Atlantic	2009-09-15	5	0.66	0.711667	5.31333	0.218333	1.45082	0.778972	0.0172606	5.8129	6.46567	6.04399	0	3.47756e+08	7.68704e+09	545.1	0	0.0235	3.92724
6.0985	81.2873	Western Indo-Pacific	1998-04-15	30	3.93	1.41	10.95	0.55	0.163381	-2.01023	-0.19246	5.75077	6.41831	7.21379	5.8549e+07	5.8549e+07	1.48366e+09	9231.31	2	0.301217	3.83943
5.97	80.44	Western Indo-Pacific	2002-04-15	5	0	1.735	10.45	0.685	0.127253	-1.99938	-0.16056	5.76092	6.90248	6.46064	0	0	1.2594e+09	167.28	1	0.279165	3.84675
9.2	123.34	Central Indo-Pacific	1998-08-15	30	7.76	2.25	20.97	0.99	1.64454	0.512352	0.157236	3.6524	3.97367	5.04737	0	2.08013e+07	7.01663e+09	6157.66	0	0.0478	3.78242
9.08	123.267	Central Indo-Pacific	1998-08-15	75	4.62	2.62	23.57	0.92	1.63504	0.519284	0.13968	3.79462	4.2801	5.04168	0	1.91884e+07	5.87037e+09	142.37	0	0.0495325	3.78242
-14.3247	-170.697	Eastern Indo-Pacific	1998-03-15	30	0	1.36	9.22	0.54	0.0698977	-1.86965	0.0324303	7.01941	6.96494	6.53424	4.24134e+08	4.24134e+08	4.26251e+09	405.57	2	0.0284	4.08905
-5.336	71.852	Western Indo-Pacific	2010-04-15	5	6.72	2.21	17.79	0.89	0.155137	-2.02053	-0.159853	4.84254	5.70442	5.70482	0	0	6.28709e+08	7305.47	0	0.0546	3.82883
6.1744	80.0661	Western Indo-Pacific	1998-04-15	75	5.78	1.18	9.61	0.33	0.131026	-1.99148	-0.212544	4.54477	5.37625	5.92631	5.58793e+07	5.58793e+07	1.24163e+09	1131.39	2	0.0998	3.84675
6.1167	80.0667	Western Indo-Pacific	1998-04-15	75	4.59	1.37	11.48	0.41	0.133981	-1.99387	-0.21171	4.85067	5.55898	6.00611	5.29298e+07	5.29298e+07	1.20873e+09	4029.6	0	0.0914	3.84675
19.9386	-75.687	Tropical Atlantic	2009-09-15	75	0	1.27	15.72	0.25	1.57714	0.667297	0.12153	5.01315	5.90164	5.41246	0	5.36324e+07	7.793e+09	178.98	2	0.0219	3.95028
-14.209	-169.455	Eastern Indo-Pacific	2002-03-15	5	3.95714	1.56	10.8543	0.647143	0.0948906	-1.89065	0.0325692	6.14127	6.50115	6.59376	0	0	8.18403e+09	358.09	2	0.0234	4.09857
-8.14	114.44	Central Indo-Pacific	2002-09-15	5	0	4.33	24.85	1.77	0.096303	-1.80144	0.179336	6.037	5.75576	4.65778	2.39101e+07	2.39101e+07	1.58951e+08	563.16	0	0.0403	3.77917
19.9734	-76.1308	Tropical Atlantic	1998-08-15	5	0	0.82	6.69	0.25	1.57409	0.680981	0.090373	5.34882	5.43287	5.29756	0	0	8.23967e+09	825.38	2	0.0233667	3.95028
13.2421	121.916	Central Indo-Pacific	1998-09-15	30	0	1.82	14.47	0.62	1.38444	0.210382	-0.519481	3.48579	4.21042	5.24463	0	1.85359e+08	3.42775e+10	1939.02	0	0.0462	3.75376
9.339	167.446	Eastern Indo-Pacific	2002-09-15	75	0	0.83	6.09	0.31	1.81441	0.491051	0.587022	6.42028	7.48288	7.11448	0	0	2.01173e+09	2014.77	0	0.0487	3.88133
8.6961	79.8677	Western Indo-Pacific	1998-05-15	30	7.07	1.34	10.47	0.46	0.458336	-1.62886	-0.750915	6.28862	6.78398	7.61734	0	1.67782e+08	4.66936e+09	8851.87	0	0.308343	3.80465
9.196	167.656	Eastern Indo-Pacific	2002-09-15	75	0	0.8	5.43	0.23	1.83096	0.480003	0.608039	6.49158	7.54746	7.20815	0	0	2.02894e+09	13194.2	2	0.0391	3.87832
-13.933	-171.547	Eastern Indo-Pacific	2002-05-15	30	4.52667	1.28	8.83667	0.543333	0.14207	-1.90841	0.0186329	5.57744	6.44283	6.42723	0	0	4.75846e+09	984	0	0.0289	4.08376
-13.8231	-171.726	Eastern Indo-Pacific	1998-03-15	75	0	1.17	9.69	0.45	0.173894	-1.93674	0.0110853	6.38166	6.45414	6.37496	1.18504e+09	1.18504e+09	4.70652e+09	804.93	2	0.0335	4.08376
-13.825	-171.785	Eastern Indo-Pacific	1998-02-15	30	0	1.58	16.39	0.51	0.175038	-1.93768	0.00893527	6.6319	6.68139	6.37496	1.12079e+09	1.12079e+09	4.59087e+09	336.94	0	0.0359	4.08376
10.8807	120.805	Central Indo-Pacific	1998-08-15	30	1.28	1.25	13.04	0.42	1.53119	0.190156	-0.427222	3.26898	4.33623	5.93314	0	9.21208e+06	1.47827e+10	11621.6	0	0.0593	3.75847
0.1833	-176.467	Eastern Indo-Pacific	2010-02-15	5	12.07	3.81	19.26	2.05	2.07538	0.254583	0.801999	5.22607	5.32765	5.64585	0	0	0	1038.72	2	0.0446	3.84644
11.1805	123.168	Central Indo-Pacific	1998-10-15	75	4.17	2.12	17.38	0.89	1.60275	0.223721	-0.334827	2.70758	3.765	4.11321	0	1.06453e+07	2.34824e+10	880.33	0	0.0797	3.77215
0.8	-176.6	Eastern Indo-Pacific	2010-02-15	5	10.84	3.52	18.17	1.87	2.07217	0.264003	0.796276	5.21992	5.37939	5.69709	0	0	0	1411.89	2	0.0445	3.83846
-14.0833	121.85	Central Indo-Pacific	1998-05-15	75	12.67	2.42	18.37	1.08	-0.0706809	-1.55851	-0.260109	4.25163	4.24154	4.45503	3.8294e+08	3.8294e+08	2.06858e+10	211205	0	0.0435	3.78544
-14.0608	121.964	Central Indo-Pacific	1998-05-15	75	11.73	2.29	17.38	0.99	-0.0714922	-1.56374	-0.26489	4.23784	4.19028	4.40095	3.85368e+08	3.85368e+08	2.01524e+10	205111	0	0.0485	3.78544
7.8541	-82.4562	Tropical Eastern Pacific	1998-10-15	75	0	1.03	11.72	0.29	0.444607	-2.13365	-0.439537	4.40734	3.7218	4.07936	0	0	1.16391e+08	1849.45	2	0.0699482	3.52932
7.9357	-82.0478	Tropical Eastern Pacific	1998-04-15	75	9.14	1.38	10.76	0.4	0.516863	-2.17063	-0.400954	3.03994	3.13974	4.02572	0	0	1.33442e+08	1839.75	2	0.0689	3.52932
8.6366	111.924	Central Indo-Pacific	1998-07-15	75	4.57	1.6	15.98	0.5	1.5389	-0.163358	-0.495076	5.03384	5.77771	6.4232	0	5.22626e+08	9.46327e+09	795.09	2	0.0411	3.72106
-11.9894	123.412	Central Indo-Pacific	1998-05-15	5	5.94	1.69	11.36	0.77	0.0497398	-1.48811	0.017464	4.67318	4.70305	4.97926	1.16685e+08	1.16685e+08	6.64619e+09	45605.9	2	0.0441	3.79858
-13.6667	122	Central Indo-Pacific	1998-05-15	30	11.83	2.32	17.67	1.11	-0.0420123	-1.53862	-0.212422	4.2652	4.24017	4.46307	2.45399e+08	2.45399e+08	1.58296e+10	189056	0	0.0867	3.78544
16.37	119.87	Central Indo-Pacific	1998-08-15	75	7.68	2.51	19.645	0.975	1.56513	0.145097	-0.47557	3.65087	4.28776	5.43011	9.39719e+07	5.18618e+08	4.80486e+10	1171.05	0	0.0492	3.71587
-12.169	122.833	Central Indo-Pacific	2003-01-15	5	5.75	1.85	15.39	0.83	0.0448094	-1.4596	0.00886758	3.65846	4.73196	4.99997	0	2.30962e+07	7.62468e+09	16693.7	2	0.0387	3.79858
-8.122	114.605	Central Indo-Pacific	2010-04-15	75	8.89	1.59	12.52	0.63	0.260954	-1.96438	0.155118	3.72031	4.59363	5.0285	0	0	1.5992e+08	1013.58	0	0.0444	3.78201
-8.1185	114.628	Central Indo-Pacific	1998-05-15	30	1.32	1.47	12.64	0.58	0.260954	-1.96438	0.155118	1.03145	1.55606	4.04702	0	0	1.60275e+08	1180.83	0	0.0422	3.78201
-12.5321	123.541	Central Indo-Pacific	1998-05-15	5	4.91	1.97	17.1	0.79	0.0325759	-1.48573	-0.0501082	4.6384	4.53677	4.7468	1.75629e+08	1.75629e+08	9.47963e+09	56618.2	0	0.0422	3.79743
11.2161	92.5991	Western Indo-Pacific	1998-05-15	75	4.63	1.54	17.09	0.46	0.903252	-1.55335	-0.755598	4.75381	5.72112	6.07907	0	9.53832e+08	3.56907e+09	8842.2	2	0.0647	3.66945
9.3272	122.747	Central Indo-Pacific	1998-07-15	75	4.52	1.23	9.5	0.36	1.81898	0.125806	-0.124504	3.83225	4.23309	4.80972	0	2.07132e+07	6.94032e+09	4461.78	2	0.058	3.78242
9.02	78.72	Western Indo-Pacific	2005-04-15	30	0	0.98	7.54	0.33	0.892834	-1.27021	-0.933271	7.3873	7.79155	7.5352	0	0	3.20512e+09	17805.4	2	0.114868	3.81273
11.7333	92.8833	Western Indo-Pacific	1998-05-15	30	5.66	1.46	10.36	0.52	0.910196	-1.54745	-0.773663	4.50378	5.58568	5.80188	0	8.57909e+08	3.41996e+09	12900.4	0	0.0443	3.65219
11.706	92.754	Western Indo-Pacific	2010-05-15	75	11.24	1.54	11.24	0.53	0.912266	-1.54536	-0.774153	4.63885	5.94157	5.90314	0	0	3.76866e+09	218.25	1	0.0462	3.65219
12	92.927	Western Indo-Pacific	2010-05-15	75	7.32	2.97	39.13	0.62	0.980566	-1.47797	-0.775643	4.38132	5.78694	5.78093	0	0	3.28477e+09	182.7	0	0.0511	3.65219
-1.0912	117.131	Central Indo-Pacific	1998-01-15	75	0	1.94	18.02	0.92	0.522892	-2.34537	0.0669721	4.92325	4.49405	4.59415	0	0	0	5051.07	0	0.225455	3.79736
9.2921	79.3277	Western Indo-Pacific	2002-04-15	30	0	1.37	7.52	0.55	1.08779	-0.880154	-1.02125	7.05137	7.81834	7.56073	0	0	3.58522e+09	259.48	0	0.1877	3.81273
8.72	119.8	Central Indo-Pacific	1998-08-15	75	2.15	1.24	8.21	0.46	1.7673	0.0167424	-0.31315	3.00761	3.91985	5.01032	0	3.3622e+07	2.83205e+09	157757	2	0.0434	3.76438
10.484	119.246	Central Indo-Pacific	1998-12-15	75	0	1.51	15.02	0.43	1.70192	0.0862813	-0.413444	3.97763	4.11859	5.27549	1.17823e+09	1.17823e+09	1.09081e+10	469.6	0	0.0659	3.75189
9.328	79.3179	Western Indo-Pacific	2002-04-15	30	1.115	1.25333	7.80167	0.493333	1.11136	-0.828876	-1.03887	7.05137	7.81834	7.56073	0	0	3.5944e+09	199.92	0	0.1877	3.81273
-8.1	114.9	Central Indo-Pacific	1998-01-15	75	2.66	1.21	8.72	0.6	0.332287	-2.04843	0.105641	1.32058	1.23491	3.96963	0	0	1.61102e+08	9338.61	0	0.0413615	3.78201
-10.1667	161.95	Central Indo-Pacific	2000-05-15	30	0	1.64	14.77	0.68	0.332097	-1.91202	0.162481	5.47271	5.40768	5.59061	0	0	3.40932e+09	980.02	2	0.039	3.94894
10.4	119.17	Central Indo-Pacific	1998-08-15	75	8.82	2.46	19.02	0.85	1.7127	0.0585127	-0.416497	3.13146	3.47671	5.27549	0	1.65995e+07	9.98028e+09	371.97	0	0.0745	3.75189
9.29	79.14	Western Indo-Pacific	2002-04-15	30	0	1.19	8.38	0.41	1.11384	-0.882216	-1.03254	7.05137	7.81834	7.56073	0	0	3.54976e+09	455.97	0	0.2148	3.81273
9.291	79.14	Western Indo-Pacific	2002-04-15	30	0	1.19	8.38	0.41	1.11384	-0.882216	-1.03254	7.05137	7.81834	7.56073	0	0	3.55028e+09	381.38	0	0.2148	3.81273
-8.1036	115.057	Central Indo-Pacific	1998-05-15	75	3.19	1.68	14.92	0.71	0.36458	-2.0808	0.0971245	0.869655	1.17827	3.96963	0	0	1.65661e+08	2220.99	0	0.0408	3.78201
10.85	72.1833	Western Indo-Pacific	2010-05-15	75	1	0.8	6.72	0.23	0.521589	-2.05768	-0.612	3.84509	5.13094	5.26211	0	1.10505e+07	3.11861e+09	587.84	0	0.0488	3.7998
8.6072	150.389	Central Indo-Pacific	1998-09-15	30	0	1.38	12.78	0.52	2.12467	0.206331	0.438557	6.02864	6.5114	6.37694	0	4.62803e+07	1.16246e+10	765.4	2	0.0424362	3.90123
2.563	104.343	Central Indo-Pacific	1998-06-15	5	3.52	1.02	8.25	0.34	1.67395	-0.592616	-0.529427	4.41424	4.34171	5.02275	0	0	4.17717e+08	195.33	2	0.0499	3.76223
3.8756	72.8433	Western Indo-Pacific	1998-05-15	75	9.42	1.08	9.42	0.34	1.12796	-1.52791	-0.782767	4.66563	4.42967	4.96686	0	0	7.67052e+07	3178	0	0.0777	3.88709
10.5771	72.6344	Western Indo-Pacific	1998-05-15	75	3.38	0.89	7.09	0.27	0.521773	-2.05153	-0.633386	3.74472	4.60479	5.08672	0	1.10331e+08	3.02887e+09	555.69	0	0.0524	3.79912
11.9049	120.263	Central Indo-Pacific	1998-08-15	75	5.29	1.83	17.95	0.72	1.85764	0.0652457	-0.242232	5.33569	5.63485	5.77749	0	3.32894e+06	2.34562e+10	1008.31	2	0.0521	3.74543
4.3333	73.3667	Western Indo-Pacific	2005-06-15	5	1.05	1.07	11.29	0.28	1.04373	-1.62449	-0.799612	5.38731	5.42476	5.04148	0	1.84354e+06	1.32914e+08	3809.8	0	0.102756	3.88709
3.25	73	Western Indo-Pacific	1998-05-15	75	7.2	1.06	8.52	0.31	1.15426	-1.52545	-0.784889	4.32069	4.1229	4.85109	0	0	3.33003e+07	2358.78	0	0.0824	3.88546
4.3167	73.575	Western Indo-Pacific	2005-06-15	5	0	0.95	6.69	0.27	0.946031	-1.71286	-0.808284	5.41481	5.45445	5.10568	0	1.74165e+06	1.38043e+08	245.95	0	0.0715	3.88504
4.2695	73.0096	Western Indo-Pacific	1998-08-15	75	1.23	1.05	9.77	0.31	1.12776	-1.5362	-0.796893	4.89262	4.65972	4.99942	0	0	1.16071e+08	928.55	0	0.0631	3.88709
3.2333	72.9333	Western Indo-Pacific	1998-05-15	75	5.8	1.15	7.93	0.38	1.19338	-1.47648	-0.779886	4.32069	4.1229	4.85109	0	0	3.07463e+07	7970.59	0	0.0807	3.88546
9.8664	118.78	Central Indo-Pacific	1998-12-15	75	0	1.47	10.13	0.57	1.81846	-0.122147	-0.362931	3.53579	3.60814	5.03668	6.88503e+08	6.88503e+08	6.59732e+09	1279.5	0	0.0867	3.75189
4.4917	73.5867	Western Indo-Pacific	2005-06-15	5	1.02	1.06	7.5	0.37	0.93519	-1.72417	-0.810798	5.45611	5.53827	5.14869	0	1.02737e+06	1.65935e+08	8613.59	0	0.0654	3.88504
4.3561	72.9836	Western Indo-Pacific	2005-06-15	5	1.36	2.09	15.28	0.93	1.13017	-1.53938	-0.798902	5.25466	5.35631	4.99942	0	2.56801e+06	1.22949e+08	6850.7	0	0.0512	3.88709
4.2716	72.7749	Western Indo-Pacific	1998-07-15	30	3.89	0.77	7.23	0.19	1.1752	-1.50019	-0.7898	4.89375	4.75699	4.99228	0	0	1.06658e+08	6024.18	0	0.0808	3.88709
10.3833	99.2833	Central Indo-Pacific	2010-05-15	75	9.75	1.57	16.86	0.42	1.11871	-1.19133	-1.00825	4.73985	5.47258	5.34968	0	0	1.2666e+09	27.65	0	0.0854	3.6732
5.114	114.599	Central Indo-Pacific	2010-06-15	30	0	0.87	8.55	0.3	1.81996	0.1707	-0.336422	4.95327	5.26065	4.61598	8.42853e+06	8.42853e+06	8.90971e+08	30080.7	2	0.116023	3.76691
11.83	99.82	Central Indo-Pacific	1998-04-15	30	0	1.24	10.43	0.36	1.37808	-0.810652	-0.899226	4.13375	4.94007	5.29352	6.68776e+08	6.68776e+08	1.39417e+09	1029.3	0	0.196205	3.64474
4.7408	73.4964	Western Indo-Pacific	1998-08-15	30	1.06	0.89	5.69	0.33	0.944672	-1.73058	-0.810225	4.93972	4.7039	5.17699	0	0	1.95257e+08	253.08	0	0.065	3.88657
8.658	97.646	Western Indo-Pacific	2002-03-15	5	0	1.88	21.01	0.58	0.870954	-1.80107	-0.813688	4.90068	5.60377	4.96794	0	0	5.04567e+08	517.5	0	0.0491	3.69002
7.752	134.576	Central Indo-Pacific	1998-08-15	30	4.62	1.82	15.46	0.79	2.16599	0.0677799	0.268052	5.04691	5.45295	5.75307	0	1.30968e+07	7.10877e+09	4579.21	0	0.0632	3.85422
-9.0092	160.102	Central Indo-Pacific	2000-01-15	30	1.46	1.42	7.86	0.7	0.433254	-1.99803	0.127236	5.06755	4.32265	4.98396	0	6.24889e+07	1.64429e+09	489.36	0	0.0502	3.94352
1.882	172.818	Eastern Indo-Pacific	2004-11-15	75	13.03	2.53	20.62	1.24	2.22135	0.132592	0.848953	4.04435	4.79001	5.24784	0	0	8.62484e+07	227.27	2	0.0594138	3.8686
1.858	172.88	Eastern Indo-Pacific	2004-11-15	75	10.75	2.49	19.92	1.1	2.22643	0.131769	0.840679	4.21555	4.87109	5.24598	0	0	8.57264e+07	169.85	2	0.138067	3.8686
13.15	100.8	Central Indo-Pacific	2000-04-15	30	0	1.82	12.28	0.62	1.46841	-0.667103	-0.93772	5.48567	5.44613	5.22207	1.94884e+07	1.94884e+07	5.90123e+08	142	0	0.224229	3.63351
8.5892	98.2288	Western Indo-Pacific	2010-05-15	75	6.51	1.6	14.42	0.49	0.981052	-1.79099	-0.863901	4.11423	5.01907	4.87929	0	0	6.43537e+08	950.71	0	0.0685	3.69002
1.633	172.967	Eastern Indo-Pacific	2004-11-15	75	9.21	2.55	13.87	1.27	2.22938	0.12755	0.84462	4.21555	4.87109	5.24598	0	0	6.93738e+07	348.23	2	0.0435	3.8686
1.714	172.987	Eastern Indo-Pacific	2004-11-15	75	11.54	2.44	17.03	1.19	2.22619	0.127845	0.849082	4.21555	4.87109	5.24598	0	0	7.41543e+07	355.84	2	0.0779	3.8686
1.6142	124.73	Central Indo-Pacific	1998-12-15	30	2.1	1.79	8.91	1.2	2.21939	-0.0324249	0.1841	3.19671	3.43218	3.87773	0	0	1.45165e+07	793.76	0	0.0426	3.82161
1.326	172.976	Eastern Indo-Pacific	2004-11-15	75	5.76	2.63	13.81	1.41	2.23233	0.12314	0.850005	4.19139	4.75793	5.11004	0	0	5.1591e+07	135.7	2	0.0436	3.87563
5.1	114.966	Central Indo-Pacific	2010-06-15	5	4	0.87	6.33	0.3	1.94558	0.0829597	-0.304239	5.08342	5.40111	5.17058	5.75173e+06	5.75173e+06	7.99998e+08	9240.29	2	0.145896	3.76691
1.333	173.022	Eastern Indo-Pacific	2004-11-15	75	4.94	2.34	13.41	1.25	2.23747	0.122889	0.838401	4.19139	4.75793	5.11004	0	0	5.30666e+07	265.01	2	0.0429	3.87563
1.2833	103.867	Central Indo-Pacific	1998-06-15	75	5.16	1.65	15.24	0.5	1.72291	-0.533197	-0.683552	4.09432	4.10981	4.08831	0	0	7.30357e+08	383.01	0	0.253092	3.77447
12.9526	100.822	Central Indo-Pacific	1998-04-15	30	0	2.02	21.93	0.66	1.48052	-0.727599	-0.936021	4.33607	4.60437	5.23713	3.31857e+08	3.31857e+08	6.78831e+08	3036.13	0	0.223851	3.63351
1.2361	103.82	Central Indo-Pacific	1998-06-15	75	6.31	1.36	8.83	0.44	1.72618	-0.546486	-0.687558	4.09432	4.10981	4.08831	0	0	6.53841e+08	1030.05	0	0.225699	3.77447
-8.4895	158.13	Central Indo-Pacific	2000-05-15	30	0	1.87	11.17	0.87	0.432977	-1.94867	0.0409459	5.27963	5.28125	5.44702	0	0	9.71676e+08	1067.38	0	0.0433	3.93889
1.358	173.146	Eastern Indo-Pacific	2004-11-15	75	7.23	2.55	17.28	1.29	2.24172	0.121848	0.826782	4.31553	4.88162	5.24705	0	0	5.48297e+07	276.78	2	0.0408	3.87563
8.095	98.302	Western Indo-Pacific	2002-03-15	5	0	3.665	22.8075	1.5375	1.10802	-1.61452	-0.940203	5.74157	5.77081	5.07923	0	0	5.19886e+08	1397.56	0	0.0691697	3.70639
-8.9979	159.252	Central Indo-Pacific	2000-05-15	30	3.28	1.65	11.42	0.85	0.458566	-1.99766	0.049352	5.48628	5.47891	5.69396	0	0	1.61387e+09	1389.05	0	0.043	3.94118
-8.067	156.8	Central Indo-Pacific	2000-01-15	75	1.85625	1.4575	12.085	0.575	0.453412	-2.03967	-0.0138147	4.99674	4.89744	5.57256	0	0	6.70265e+08	230.16	0	0.0448	3.93665
4.9736	118.391	Central Indo-Pacific	1998-05-15	5	4.55	1.69	9.05	0.68	1.94986	-0.619443	-0.430168	2.41817	2.23577	3.57186	0	3.33089e+06	1.83777e+08	773.03	0	0.1098	3.77906
9.6827	100.034	Central Indo-Pacific	1998-04-15	30	1.77333	1.595	17.5933	0.468333	1.34338	-1.05262	-1.04387	4.3375	4.51149	4.92501	3.35598e+08	3.35598e+08	1.54212e+09	1210.89	0	0.142767	3.67314
1.1385	122.35	Central Indo-Pacific	1998-10-15	30	7.55	1.66	13.66	0.93	2.23886	-0.143566	0.0423467	1.68429	2.03629	3.37886	0	0	0	11023	1	0.0509	3.81166
-8.5	160.9	Central Indo-Pacific	2000-05-15	30	0	1.3	12.15	0.42	0.512426	-2.04492	0.0882426	5.18409	5.18534	5.31769	0	0	1.17464e+09	237.54	0	0.044	3.94502
12.6363	100.848	Central Indo-Pacific	1998-04-15	75	0	1.07	9.52	0.32	1.51714	-0.843379	-0.916903	4.38961	5.15829	5.37638	4.38672e+08	4.38672e+08	8.71177e+08	1782.95	0	0.0911	3.63351
-7.65	156.667	Central Indo-Pacific	2000-05-15	30	2.6	2.43	19.5	1.17	0.495001	-2.04276	0.0200175	5.36353	5.12514	5.19171	0	0	5.55015e+08	320.78	0	0.0507	3.93665
12.5503	101.425	Central Indo-Pacific	1998-04-15	30	0	1.81	11.85	0.62	1.40932	-1.08129	-0.977639	4.15238	5.07492	5.30477	3.62343e+08	3.62343e+08	7.45544e+08	2352.79	0	0.126744	3.63351
7.4	99.2167	Western Indo-Pacific	2010-05-15	75	7.76	1.68	18.01	0.46	1.30912	-1.46093	-1.09248	4.75927	5.18115	4.87345	0	0	6.24061e+08	136.06	0	0.11358	3.72077
7.3167	99.25	Western Indo-Pacific	2010-05-15	75	6.89	1.87	19.04	0.58	1.32054	-1.46027	-1.0927	4.65225	5.01577	4.79308	0	0	6.05116e+08	200.44	2	0.0936	3.72077
-8.5	179.18	Eastern Indo-Pacific	2002-05-15	75	0	1.3	9.92	0.54	1.0218	-1.72384	0.752615	5.30786	5.64268	5.71439	0	0	1.68768e+09	1561.17	0	0.0495	3.98243
-5.2592	151.023	Central Indo-Pacific	1998-08-15	30	0	1.61	10.28	0.58	0.815178	-2.21812	0.318732	0.978276	1.13216	3.47317	0	0	1.98393e+07	1252.98	1	0.0462	3.92211
-5.1503	150.573	Central Indo-Pacific	1998-08-15	5	0	1.8	11.63	0.97	0.822078	-2.27974	0.29919	1.46457	1.73017	3.79823	0	0	8.2409e+06	22685.2	1	0.0388	3.92211
6.85	99.5667	Western Indo-Pacific	2010-05-15	75	9.97	1.99	16.15	0.64	1.48265	-1.27965	-1.12933	4.48352	4.65434	4.53792	0	0	5.28797e+08	2822.55	0	0.145912	3.71959
-8	178.367	Eastern Indo-Pacific	2004-10-15	75	0	0.97	6.79	0.45	1.11924	-1.64093	0.821864	5.37313	5.58405	5.66791	0	0	1.06218e+09	2199.23	0	0.0562	3.97943
-0.836	120.199	Central Indo-Pacific	2010-05-15	75	0	1.23	9.84	0.43	1.0994	-2.47642	-0.606143	3.39125	3.60094	3.74127	0	0	0	886.55	0	0.048956	3.80747
-0.3333	122	Central Indo-Pacific	1998-10-15	5	0	1.70333	12.7533	0.9	1.56217	-2.07605	-0.830513	1.91951	2.36739	3.67063	0	0	0	600.54	0	0.0448	3.81371
